# Supplementary material for: A chiral self-sorting photoresponsive coordination cage based on overcrowded alkenes
Source: PubMed Central journal article supplement (PMC6880828; doi:10.3762/bjoc.15.268), 2019-11-15
Supplement: Beilstein_J_Org_Chem-15-2767-s001.pdf [file Beilstein_J_Org_Chem-15-2767-s001.pdf]

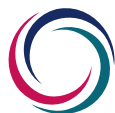

## Supporting Information

for

### **A chiral self-sorting photoresponsive coordination cage based on overcrowded alkenes**

Constantin Stuckhardt, Diederik Roke, Wojciech Danowski, Edwin Otten, Sander J. Wezenberg and Ben L. Feringa

*Beilstein J. Org. Chem.* **2019**, *15*, 2767–2773. [doi:10.3762/bjoc.15.268](https://doi.org/10.3762/bjoc.15.268)

**Experimental procedures, compound characterization, CD spectroscopy, binding studies, NMR studies of the photochemical and thermal isomerizations, X-ray crystallography, computational details and Cartesian coordinates of DFT optimized structures**

## Table of Contents

|              |                                                                  |            |
|--------------|------------------------------------------------------------------|------------|
| <b>I.</b>    | <b>General procedures .....</b>                                  | <b>S2</b>  |
| <b>II.</b>   | <b>Experimental procedures and compound characterization ...</b> | <b>S3</b>  |
| <b>III.</b>  | <b>CD spectroscopy .....</b>                                     | <b>S9</b>  |
| <b>IV.</b>   | <b>Binding studies .....</b>                                     | <b>S10</b> |
| <b>V.</b>    | <b>Photochemical and thermal isomerization studies .....</b>     | <b>S13</b> |
| <b>VI.</b>   | <b>X-ray crystallography .....</b>                               | <b>S17</b> |
| <b>VII.</b>  | <b>Computational details .....</b>                               | <b>S18</b> |
| <b>VIII.</b> | <b>Cartesian coordinates of DFT optimized structures .....</b>   | <b>S23</b> |

## I. General procedures

All reactions involving air-sensitive reagents were performed under a dry N<sub>2</sub> atmosphere. Anhydrous THF was used from a solvent purification system (MBRAUN SPS systems, MBSPS-800). All other chemicals were commercial products and were used as received. Flash column chromatography was performed using silica gel (SiO<sub>2</sub>) purchased from Merck (type 9385, 230–400 mesh). Thin-layer chromatography (TLC) was carried out on aluminum sheets coated with silica 60 F253 obtained from Merck. Compounds were visualized with a UV lamp (254 nm) or by staining with CAM. Melting points (mp) were determined using a Büchi-B545 capillary melting point apparatus. <sup>1</sup>H and <sup>13</sup>C NMR spectra were recorded on a Varian Mercury-Plus 400 or a Varian Unity-Plus 500 spectrometer at 298 K unless indicated otherwise. Chemical shifts are quoted in parts per million (ppm) relative to either CDCl<sub>3</sub> (δ 7.26 for <sup>1</sup>H, δ 77.16 for <sup>13</sup>C) or CD<sub>2</sub>Cl<sub>2</sub> (δ 5.32 for <sup>1</sup>H, δ 53.84 for <sup>13</sup>C) or CD<sub>3</sub>CN (δ 1.94 for <sup>1</sup>H, also used as reference for solvent mixtures containing CD<sub>3</sub>CN). For <sup>1</sup>H NMR spectroscopy, the splitting pattern of peaks is designated as follows: s (singlet), d (doublet), t (triplet), m (multiplet), p (quintet), or dd (doublet of doublets). High resolution mass spectrometry (ESIMS) was performed on a LTQ Orbitrap XL spectrometer for organic compounds and on a Bruker Maxis Plus QTOF spectrometer for coordination compounds with ESI ionisation. UV–vis and CD spectra were recorded in a 1 cm quartz cuvette. CD spectra were recorded on a Jasco 810 CD spectropolarimeter. UV–vis absorption spectra were recorded on an Agilent 8453 UV–vis Spectroscopy System. The UV–vis and NMR irradiation experiments with λ<sub>max</sub> = 312 nm were carried out with a Spectroline ENB-280C/FE lamp (8 W) while cooling the irradiated sample in an ethanol bath. Solvents used for irradiation experiments were degassed by means of at least three freeze-pump-thaw cycles and CD<sub>2</sub>Cl<sub>2</sub> as well as CH<sub>2</sub>Cl<sub>2</sub> were filtered over K<sub>2</sub>CO<sub>3</sub> prior to use. The exact temperature during NMR measurements was determined by measuring the electric resistance with a Keithley 197 Autoranging Microcolt Digital Multimeter which was then translated into the temperature by means of a Pt100 table.

## II. Experimental procedures and compound characterization

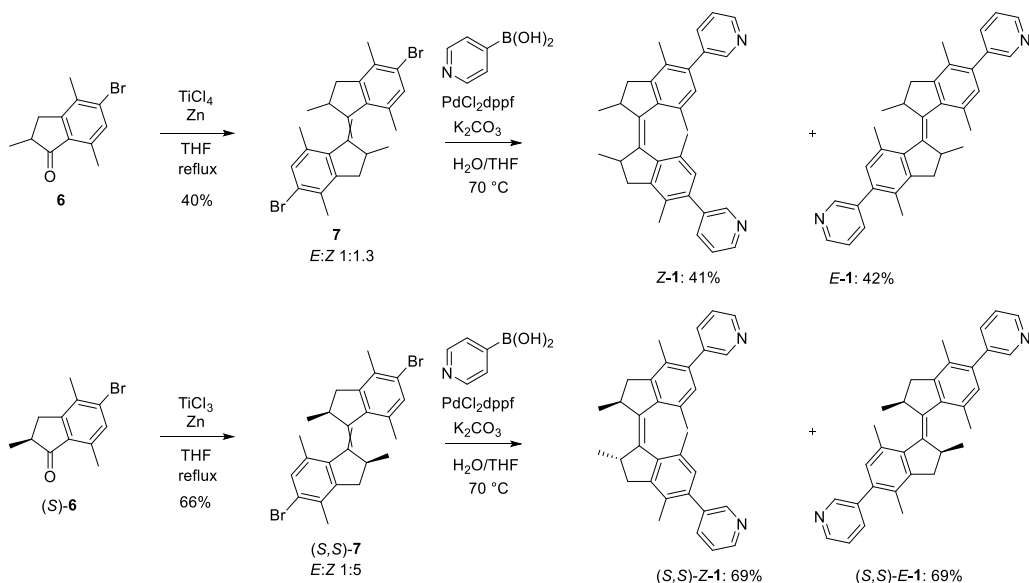

**Scheme S1:** Synthesis of overcrowded alkene-based ligands **1**

Racemic and enantiopure ketone **6** and motor **7** were synthesized according to literature procedures.<sup>1</sup>

**(Z)-3,3'-(2,2',4,4',7,7'-hexamethyl-2,2',3,3'-tetrahydro-[1,1'-biindenylidene]-5,5'-diyl)dipyridine (Z-1)** and **(E)-3,3'-(2,2',4,4',7,7'-hexamethyl-2,2',3,3'-tetrahydro-[1,1'-biindenylidene]-5,5'-diyl)dipyridine (E-1)**

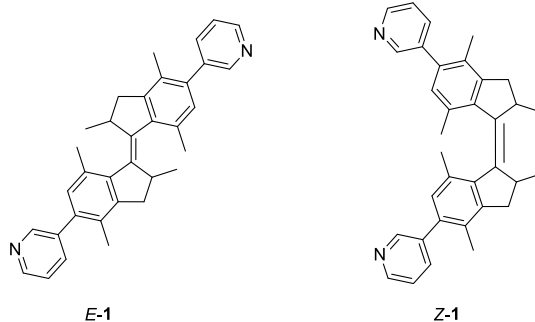

A 1.5:1 *E/Z* mixture of motor **7** (700 mg, 1.48 mmol, 1.0 equiv), 3-pyridinylboronic acid (454 mg, 3.69 mmol, 2.5 equiv), [1,1'-bis(diphenylphosphino)ferrocene]dichloropalladium(II), complex with  $\text{CH}_2\text{Cl}_2$  (60 mg, 73.8  $\mu\text{mol}$ , 0.05 equiv) and  $\text{K}_2\text{CO}_3$  (1.40 g, 10.1 mmol, 6.8 equiv) were dissolved in a mixture of water (7.4 mL) and THF (21 mL). The mixture was degassed by purging with  $\text{N}_2$  for 30 min and then stirred at 70 °C for 2 d. Then, the mixture was diluted with  $\text{CH}_2\text{Cl}_2$  (50 mL) and washed with brine (50 mL). The organic phases were combined and dried over  $\text{Mg}_2\text{SO}_4$ , volatiles were removed in vacuo and the residue was purified

<sup>1</sup> T. M. Neubauer, T. van Leeuwen, D. Zhao, A. S. Lubbe, J. C. M. Kistemaker, B. L. Feringa, *Org. Lett.* **2014**, *16*, 4220–4223.

using column chromatography (SiO<sub>2</sub>, CH<sub>2</sub>Cl<sub>2</sub> + 2.5% MeOH) to give ligands **Z-1** (343 mg, 0.73 mmol, 82%) and **E-1** (233 mg, 0.49 mmol, 83%) as off-white solids.

**Z-1**: <sup>1</sup>H-NMR (400 MHz, CDCl<sub>3</sub>) δ (ppm) = 8.64 (s, 2H), 8.58 (s, 2H), 7.72 (d, *J* = 7.8 Hz, 2H), 7.37 (s, 2H), 6.86 (s, 2H), 3.43 (t, *J* = 6.6 Hz, 2H), 3.18 (dd, *J* = 14.9, 6.4 Hz, 2H), 2.53 (d, *J* = 15.4 Hz, 2H), 2.20 (s, 6H), 1.61 (s, 6H), 1.15 (d, *J* = 6.8 Hz, 6H).

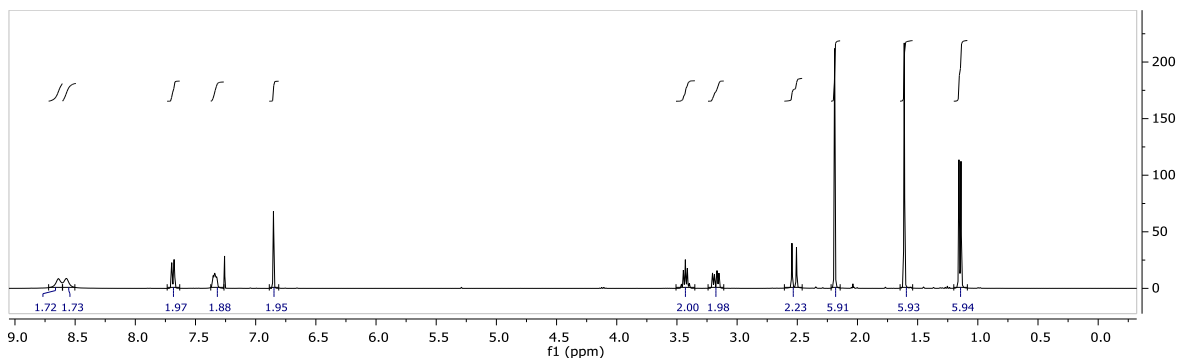

<sup>13</sup>C-NMR (151 MHz, CDCl<sub>3</sub>) δ (ppm) = 150.23, 147.72, 145.64, 141.04, 140.91, 137.97, 136.87, 136.84, 133.35, 129.99, 128.27, 123.05, 41.89, 39.55, 20.81, 20.70, 16.42.

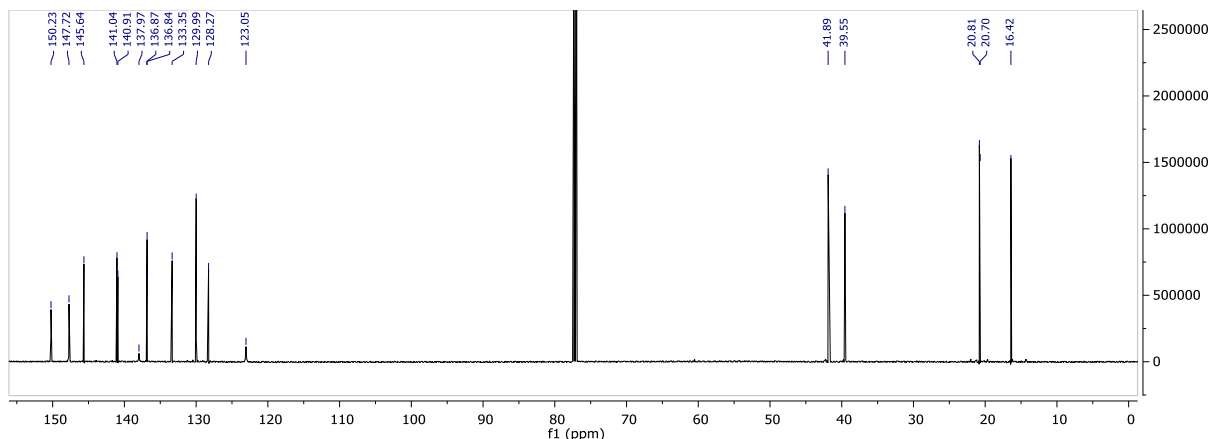

Mp 269 °C

HRMS (ESI<sup>+</sup>): calcd for C<sub>34</sub>H<sub>35</sub>N<sub>2</sub><sup>+</sup> (M+H<sup>+</sup>): 471.2795, found 471.2763.

The enantiopure ligand (*S,S*)-**Z-1** was prepared according to the same procedure employing a mixture of enantiopure precursors (*S,S*)-**Z-7** and (*S,S*)-**E-7** with >99% ee as determined by chiral HPLC analysis, Chiralpak AD-H (90% heptane/10% iPrOH), 0.5 mL/min, retention times (min) 12.4 (major) and 15.5 (minor).

**E-1**: <sup>1</sup>H-NMR (400 MHz, CDCl<sub>3</sub>) δ (ppm) = 8.66 (s, 2H), 8.59 (s, 2H), 7.73 (d, *J* = 7.7 Hz, 2H), 7.38 (s, 2H), 7.00 (s, 2H), 3.22 – 2.89 (m, 2H), 2.79 (dd, *J* = 14.7, 5.7 Hz, 2H), 2.50 (s, 6H), 2.34 (d, *J* = 14.6 Hz, 2H), 2.13 (s, 6H), 1.17 (d, *J* = 6.5 Hz, 6H).

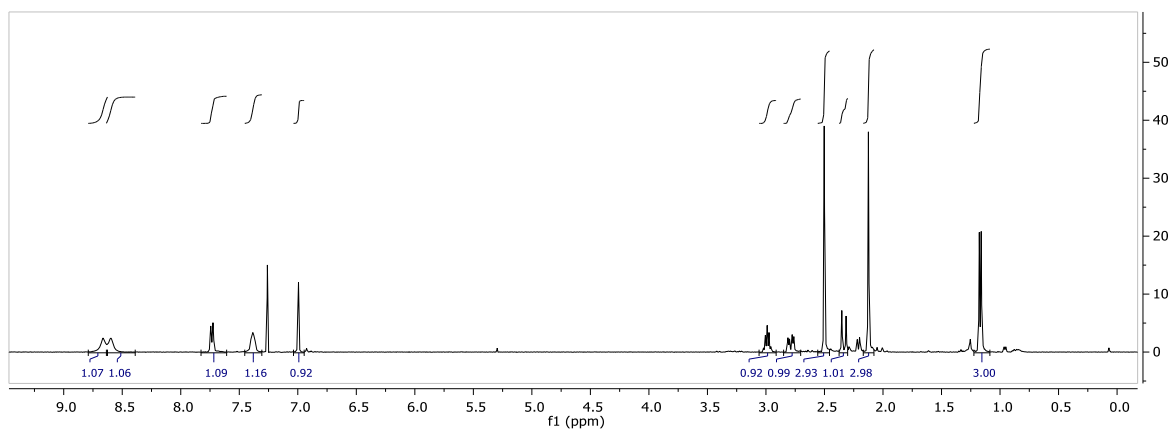

$^{13}\text{C-NMR}$  (101 MHz,  $\text{CDCl}_3$ )  $\delta$  (ppm) = 150.30, 147.90, 143.97, 141.70, 140.98, 137.82, 136.89, 136.81, 131.27, 130.48, 129.05, 123.03, 42.21, 39.76, 22.01, 19.69, 16.30.

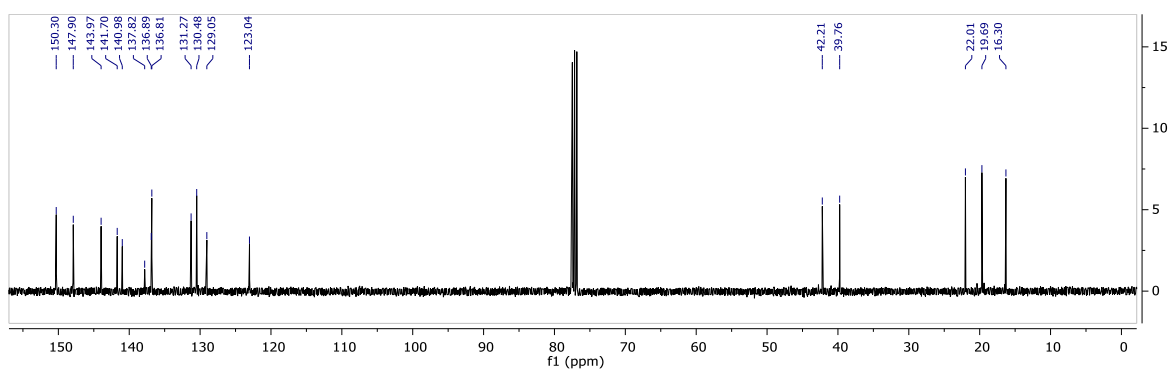

Mp 235-237 °C

HRMS (ESI+): calcd for  $\text{C}_{34}\text{H}_{35}\text{N}_2^+$  ( $\text{M}+\text{H}^+$ ): 471.2795, found 471.2764.

The enantiopure ligand (*S,S*)-**E-1** was prepared according to the same procedure employing a mixture of enantiopure precursors (*S,S*)-**Z-7** and (*S,S*)-**E-7** with >99% ee as determined by chiral HPLC analysis, Chiralpak AD-H (90% heptane/10% iPrOH), 0.5 mL/min, retention times (min) 11.3 (major) and 12.6 (minor).

## Cage formation

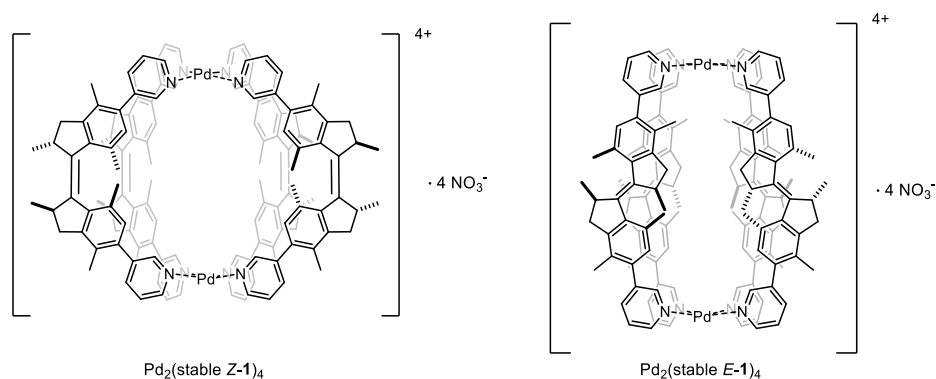

A solution ( $c \leq 2.5$  mM) of 1.0 equiv of  $\text{Pd}(\text{NO}_3)_2$  in  $\text{CD}_3\text{CN}$ , alternatively in a mixture with  $\text{CD}_2\text{Cl}_2$ , was added to 2.0 equiv of either **Z-1** or **E-1** in a closed vial and the mixture was heated at reflux until a clear solution was obtained to yield either  $\text{Pd}_2(\text{stable Z-1})_4$  or  $\text{Pd}_2(\text{stable E-1})_4$  in solution.

$\text{Pd}_2(\text{stable Z-1})_4$ :  $^1\text{H}$  NMR (500 MHz,  $\text{CD}_3\text{CN}$ )  $\delta$  (ppm) = 8.81 (s, 8H), 8.67 (d,  $J = 5.8$  Hz, 8H), 7.99 (d,  $J = 8.4$  Hz, 8H), 7.55 (dd,  $J = 8.1, 5.7$  Hz, 8H), 7.00 (s, 8H), 3.52 – 3.31 (m, 8H), 3.05 (dd,  $J = 14.8, 6.2$  Hz, 8H), 2.48 (dd,  $J = 14.9, 7.7$  Hz, 8H), 1.97 (s, 24H), 1.61 (s, 24H), 1.02 (d,  $J = 6.7$  Hz, 24H). HRMS (ESI+): calcd for  $\text{C}_{136}\text{H}_{136}\text{N}_{11}\text{O}_9\text{Pd}_2^+$  ( $[\text{Pd}_2(\text{stable Z-1})_4(\text{NO}_3)_3]^+$ ): 2280.8644, found 2280.8893; calcd for  $\text{C}_{136}\text{H}_{136}\text{N}_{10}\text{O}_6\text{Pd}_2^{2+}$  ( $[\text{Pd}_2(\text{stable Z-1})_4(\text{NO}_3)_2]^{2+}$ ): 1109.4380, found 1109.4513; calcd for  $\text{C}_{136}\text{H}_{136}\text{N}_9\text{O}_3\text{Pd}_2^{3+}$  ( $[\text{Pd}_2(\text{stable Z-1})_4(\text{NO}_3)]^{3+}$ ): 718.9625, found 718.9712; calcd for  $\text{C}_{136}\text{H}_{136}\text{N}_8\text{Pd}_2^{4+}$  ( $[\text{Pd}_2(\text{stable Z-1})_4]^{4+}$ ): 523.7248, found 523.7303.

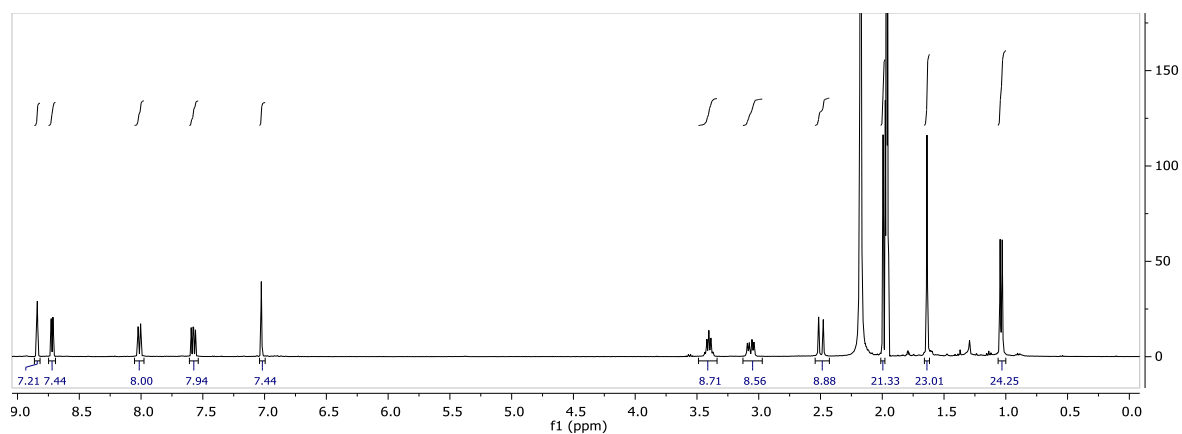

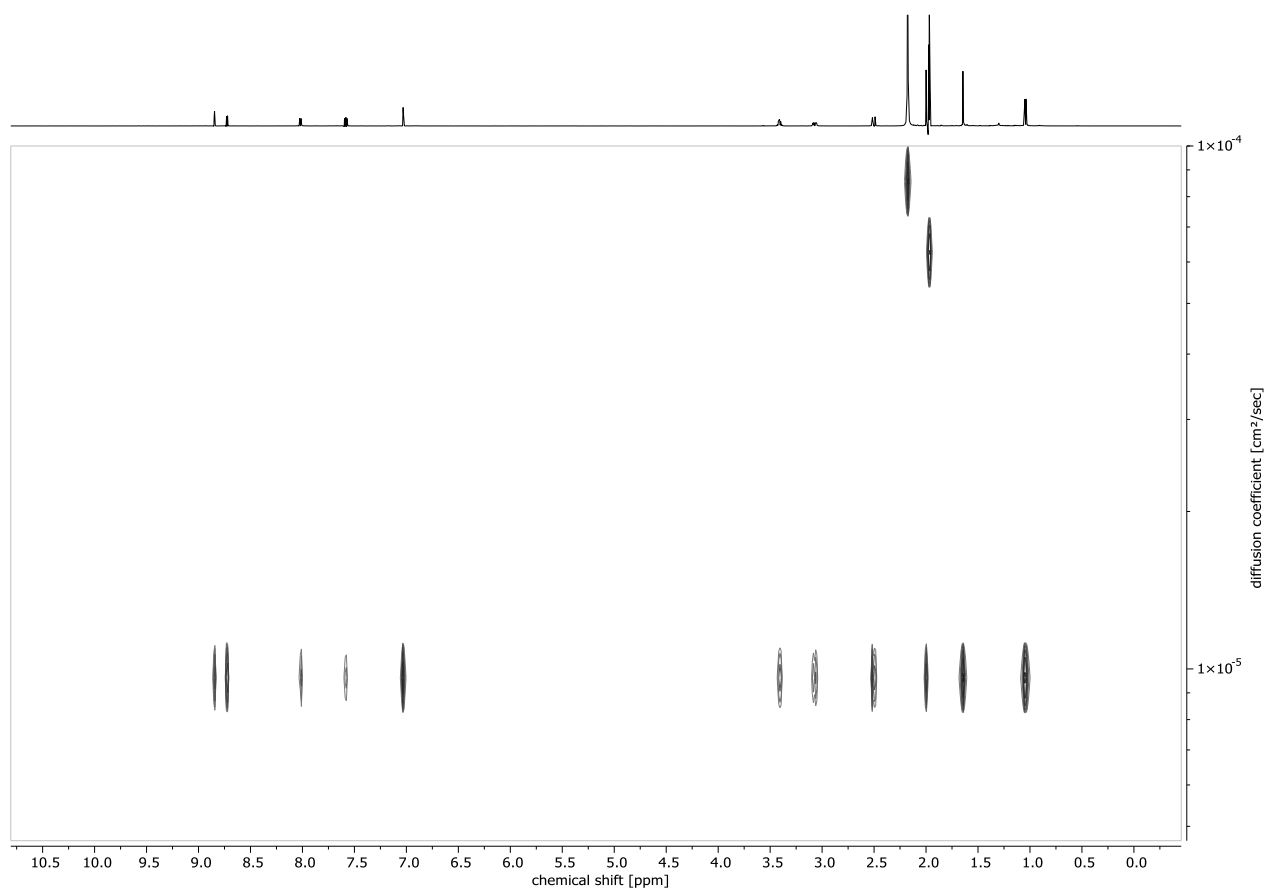

$\text{Pd}_2(\text{stable } E\text{-}\mathbf{1})_4$  :  $^1\text{H}$  NMR (500 MHz,  $\text{CD}_3\text{CN}$ )  $\delta$  (ppm) = 9.56 (br, 8H), 9.16 (d,  $J = 5.7$  Hz, 8H), 8.13 – 7.85 (m, 8H), 7.67 (dd,  $J = 7.7, 5.8$  Hz, 8H), 6.88 (s, 8H), 2.93 (t,  $J = 6.3$  Hz, 8H), 2.55 – 2.47 (m, 8H), 2.43 (s, 24H), 2.12 (d,  $J = 12.7$  Hz, 8H, \*covered by solvent signal), 1.52 (s, 24H), 1.08 (d,  $J = 6.4$  Hz, 24H). HRMS (ESI+): calcd for  $\text{C}_{136}\text{H}_{136}\text{N}_{10}\text{O}_6\text{Pd}_2^{2+}$  ( $[\text{Pd}_2(\text{stable } E\text{-}\mathbf{1})_4(\text{NO}_3)_2]^{2+}$ ): 1109.4380, found 1109.4378; calcd for  $\text{C}_{136}\text{H}_{136}\text{N}_9\text{O}_3\text{Pd}_2^{3+}$  ( $[\text{Pd}_2(\text{stable } E\text{-}\mathbf{1})_4(\text{NO}_3)]^{3+}$ ): 718.9625, found 718.9613.

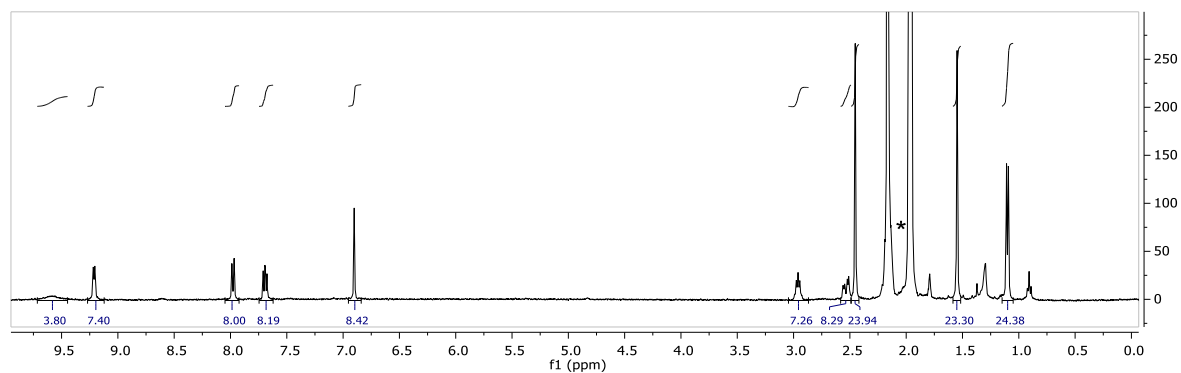



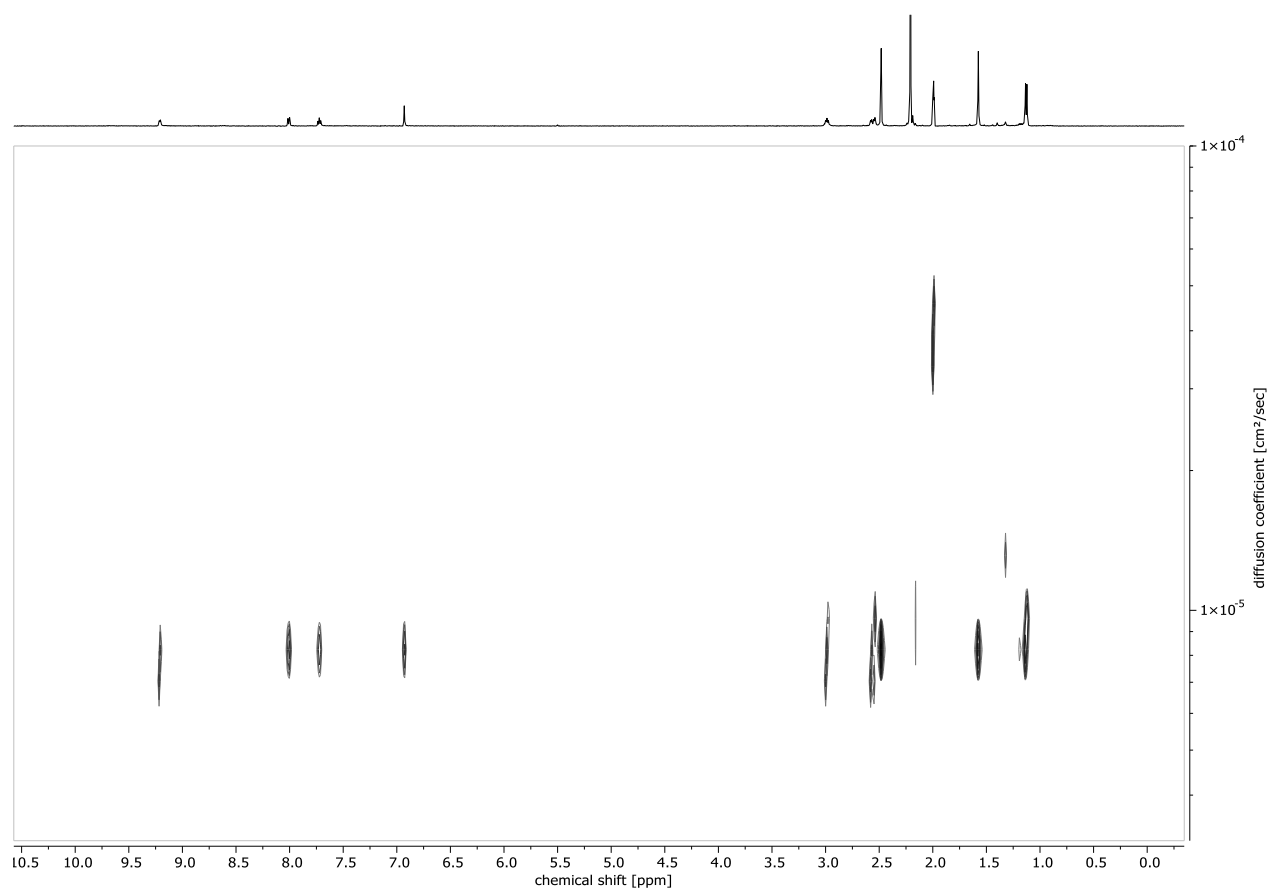

### III. CD spectroscopy

Samples of cage  $\text{Pd}_2(\text{stable Z-1})_4$  in 0, 10, 20, 30, 40, 50, 60, 70, 80, 90 and 100% ee were prepared by mixing an enantiopure and a racemic stock solution ( $c = 1.1 \cdot 10^{-5}$  M for both) and CD spectra were measured at 20 °C.

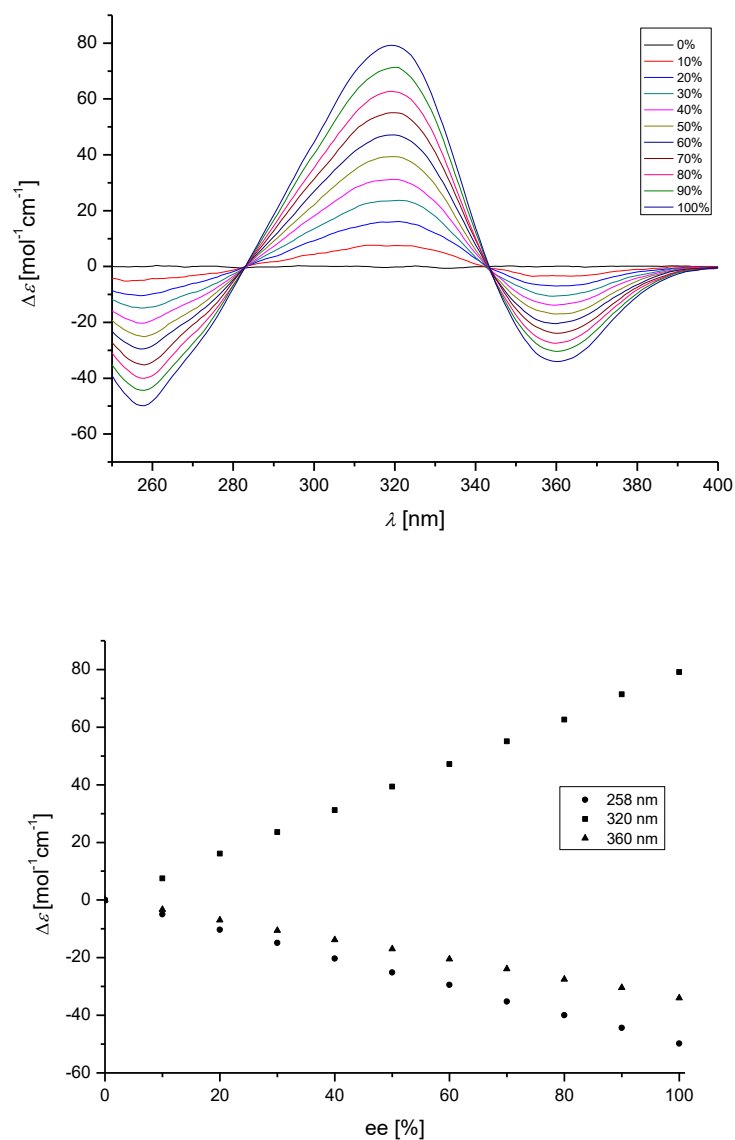

**Figure S1:** CD spectra of  $\text{Pd}_2(\text{stable Z-1})_4$  with varying ee (top). Plot of  $\Delta\epsilon$  versus the ee of  $\text{Pd}_2(\text{stable Z-1})_4$ , showing a linear dependency (bottom).

## IV. Binding studies

A Job plot analysis was performed by plotting the host-guest concentration ([HG]) versus the molar fraction of the host ( $x$ ). Different molar fractions were obtained by mixing stock solutions ( $c = 3.4 \cdot 10^{-4}$  M) of TBAOTs and  $\text{Pd}_2(\text{stable Z-1})_4$  or  $\text{Pd}_2(\text{stable E-1})_4$  in a 1:1 mixture of  $\text{CD}_3\text{CN}$  and  $\text{CD}_2\text{Cl}_2$ . The host guest concentration ([HG]) was then determined by equation 1, in which  $[\text{H}]_0$  is the total concentration of host,  $\delta_{\text{obs}}$  is the measured chemical shift of proton  $\text{H}_a$  in the host-guest mixture,  $\delta_0$  is the chemical shift of proton  $\text{H}_a$  for the pure host and  $\delta_{\text{complex}}$  is the chemical shift of proton  $\text{H}_a$  in the host-guest complex which is assumed to be formed completely for a host-guest ratio of 1:9. Plotting [HG] versus the molar fraction of the host ( $x$ ) yielded curves with maxima for  $x = 0.5$ , confirming a 1:1 binding stoichiometry (Figure S2).

$$[\text{HG}] = [\text{H}]_0 \cdot \frac{\delta_{\text{obs}} - \delta_0}{\delta_{\text{complex}} - \delta_0} \quad (1)$$

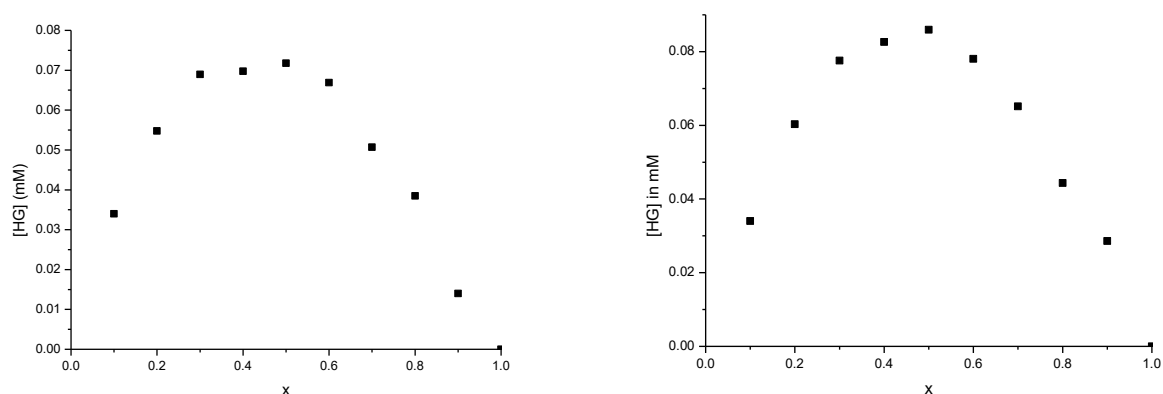

**Figure S2:** Job plot of tosylate binding to  $\text{Pd}_2(\text{stable Z-1})_4$  (left) and  $\text{Pd}_2(\text{stable E-1})_4$  (right).

The binding constants were determined by NMR titrations at 20 °C. Titration of a stock solution of  $\text{Pd}_2(\text{stable Z-1})_4$  ( $c = 3.0 \times 10^{-4}$  M) or  $\text{Pd}_2(\text{stable E-1})_4$  ( $c = 2.7 \times 10^{-4}$  M) with a stock solution of tetrabutylammonium tosylate ( $c = 4.0 \times 10^{-3}$  M) in a 1:1 mixture of  $\text{CD}_2\text{Cl}_2$  and  $\text{CD}_3\text{CN}$  that contained the guest in the same concentration to exclude dilution effects was performed. The chemical shifts of  $\text{H}_{a-d}$  ( $\text{Pd}_2(\text{stable Z-1})_4$ ) and  $\text{H}_{a,c-e}$  ( $\text{Pd}_2(\text{stable E-1})_4$ ) were plotted against the host to guest ratio and fitted against a 1:1 binding model using BindFit software (Figure S3).<sup>2</sup> Binding constants of  $1604 \pm 39 \text{ M}^{-1}$  for  $\text{Pd}_2(\text{stable Z-1})_4$  and  $1758 \pm 39 \text{ M}^{-1}$  for  $\text{Pd}_2(\text{stable E-1})_4$  were obtained.

<sup>2</sup> P. Thordarson, BindFit v0.5, apps.supramolecular.org

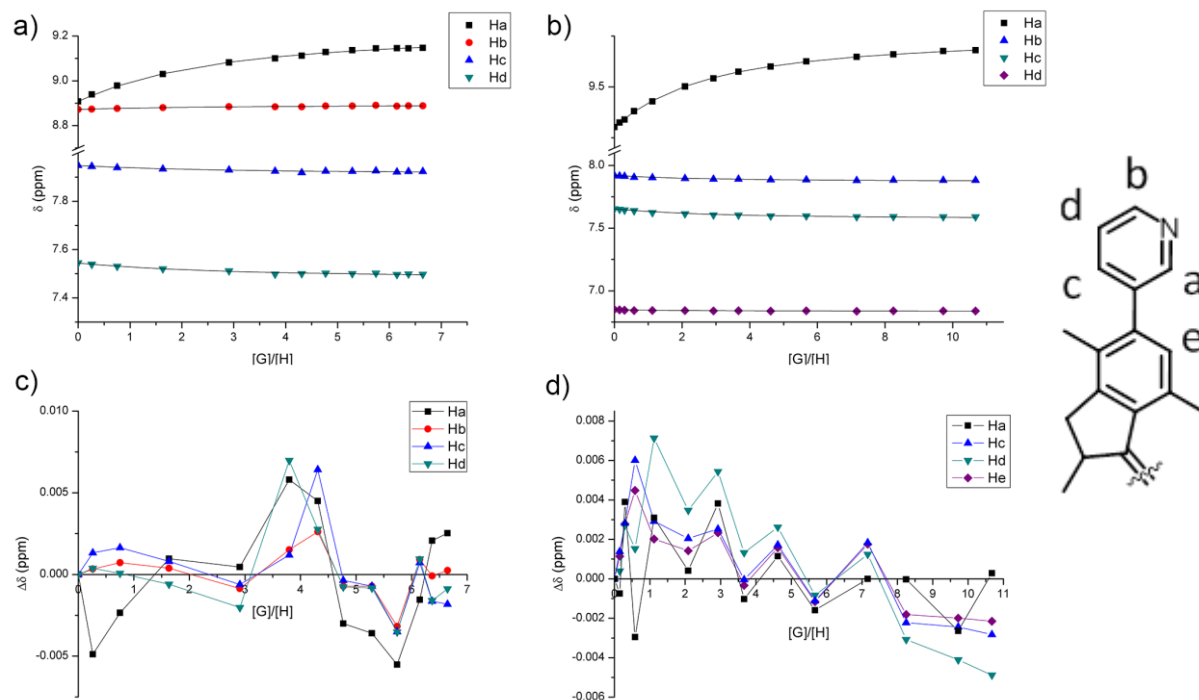

**Figure S3:** Top: Fitting of  $^1H$ -NMR titration data of  $Pd_2(\text{stable Z-1})_4$  (a) and  $Pd_2(\text{stable Z-1})_4$  (b) with tetrabutylammonium tosylate using protons  $H_a$ - $H_e$  as shown in figure 5.3. Bottom: residual plots of fitting of  $^1H$ -NMR titration data of  $Pd_2(\text{stable Z-1})_4$  (c) and  $Pd_2(\text{stable Z-1})_4$  (d).

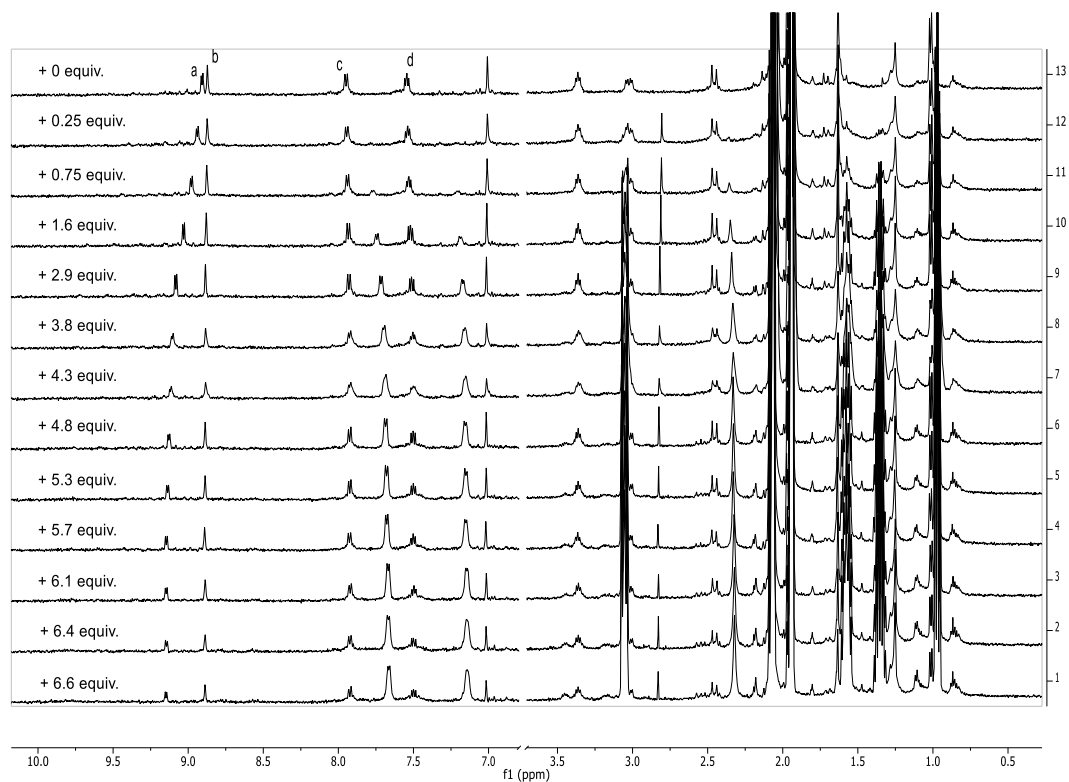

**Figure S4:** Changes in the  $^1H$  NMR signals of  $Pd_2(\text{stable Z-1})_4$  upon stepwise addition of TBAOTs

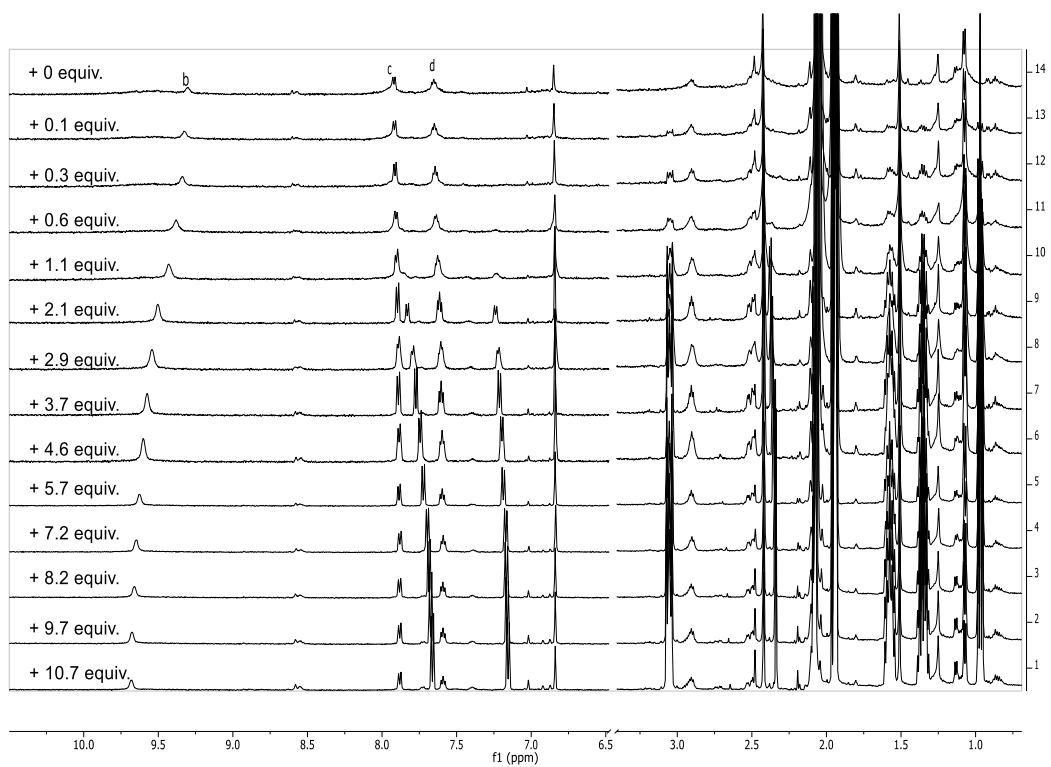

**Figure S5:** Changes in the <sup>1</sup>H NMR signals of Pd<sub>2</sub>(stable E-1)<sub>4</sub> upon stepwise addition of TBAOTs

## V. Photochemical and thermal isomerization studies

### Switching cycle of ligand 1

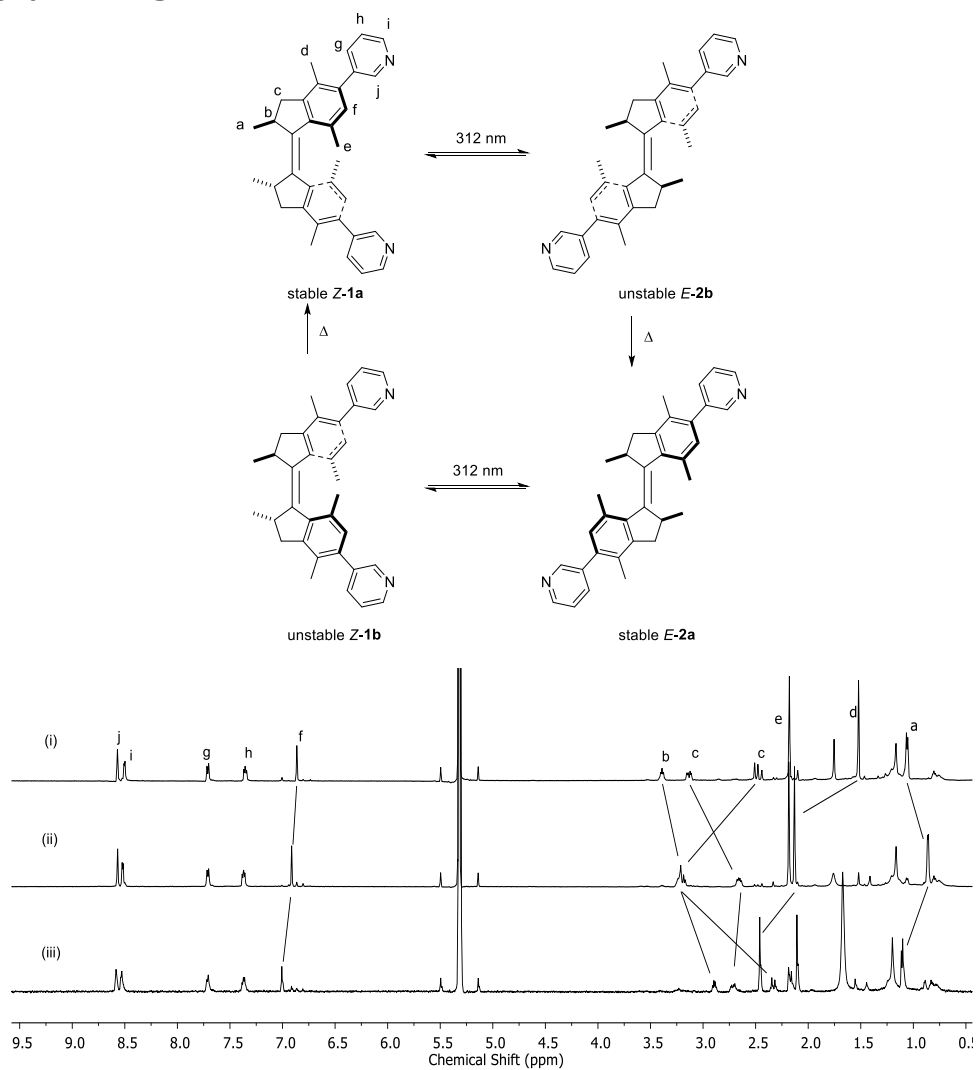

**Figure S6:** <sup>1</sup>H NMR spectrum of switching cycle of ligand stable Z-1 in CD<sub>2</sub>Cl<sub>2</sub> at -55 °C. i) Stable Z-1. ii) PSS 312, unstable E-1. iii) THI, stable E-1.

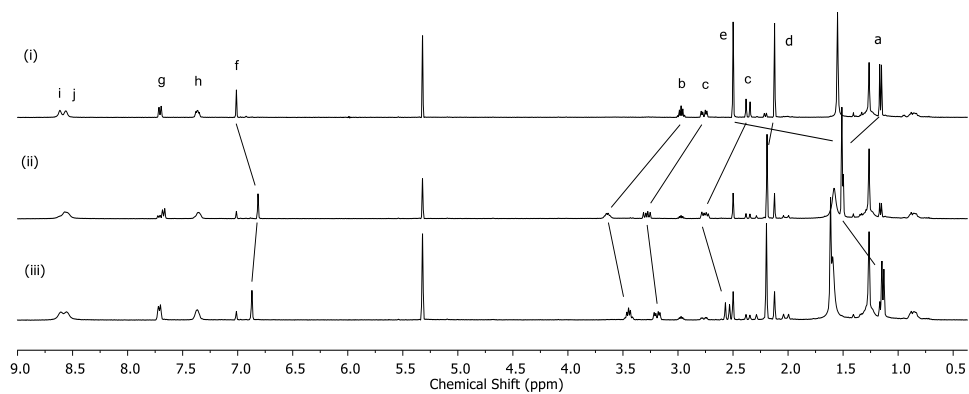

**Figure S7:**  $^1\text{H}$  NMR spectra of switching cycle of ligand stable E-1 in  $\text{CD}_2\text{Cl}_2$ . i) stable E-1 ii) PSS 312 nm, unstable Z-1. iii) THI, stable Z-1.

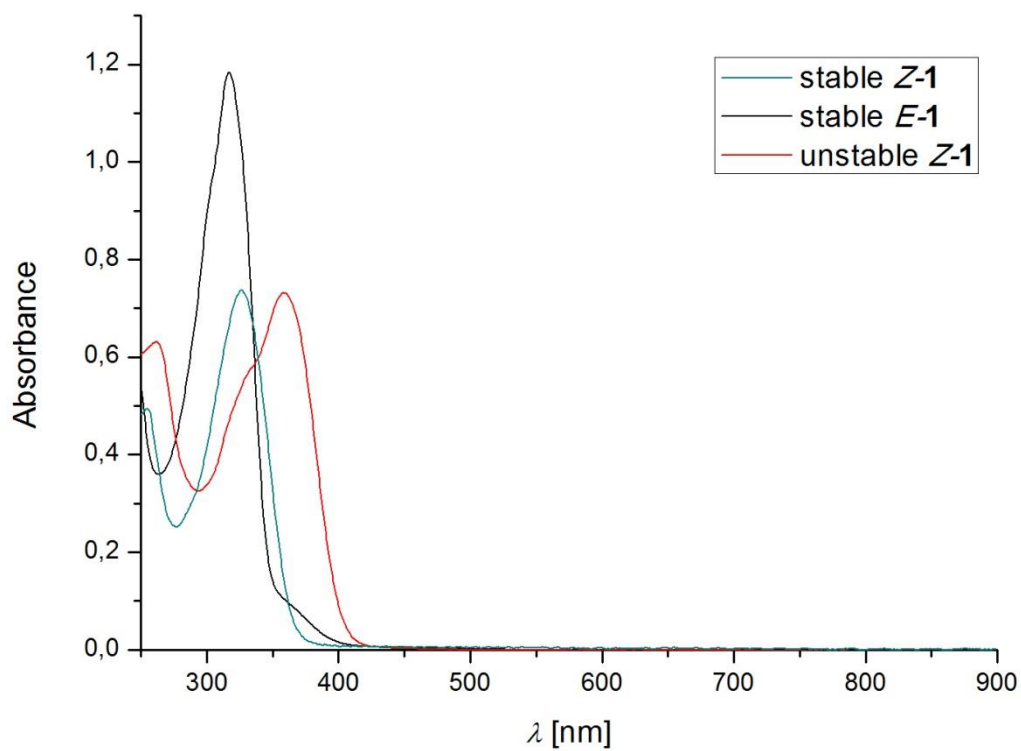

**Figure S8:** UV-vis spectra of switching cycle of ligand isomers in heptane,  $c = 3 \times 10^{-5} \text{ M}$ .

## Isomerization of cage complexes

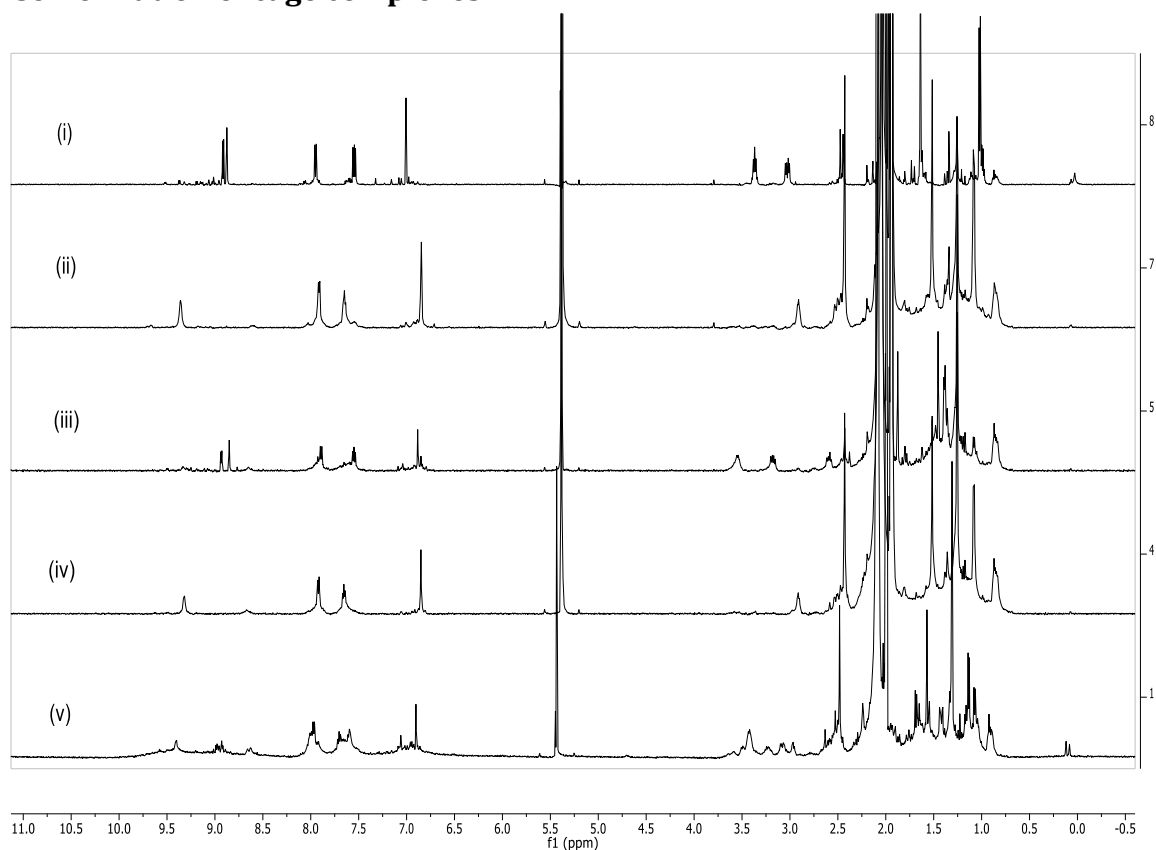

**Figure S9:** Stacked <sup>1</sup>H-NMR spectra (CD<sub>3</sub>CN/CD<sub>2</sub>Cl<sub>2</sub> 1:1,  $c = 5.7 \times 10^{-4}$  M) of i: Pd<sub>2</sub>(stable Z-1)<sub>4</sub>, ii: Pd<sub>2</sub>(stable E-1)<sub>4</sub> generated by irradiation of cage Pd<sub>2</sub>(stable Z-1)<sub>4</sub> with 312 nm at -70 °C and subsequent warming to rt; iii: Pd<sub>2</sub>(unstable Z-1)<sub>4</sub> generated by irradiation of Pd<sub>2</sub>(stable E-1)<sub>4</sub> with 312 nm at -20 °C iv: Pd<sub>2</sub>(stable E-1)<sub>4</sub> generated by irradiation of Pd<sub>2</sub>(unstable Z-1)<sub>4</sub> with 365 nm at -20 °C. v: complex mixture obtained after thermal decomposition of Pd<sub>2</sub>(unstable Z-1)<sub>4</sub>.



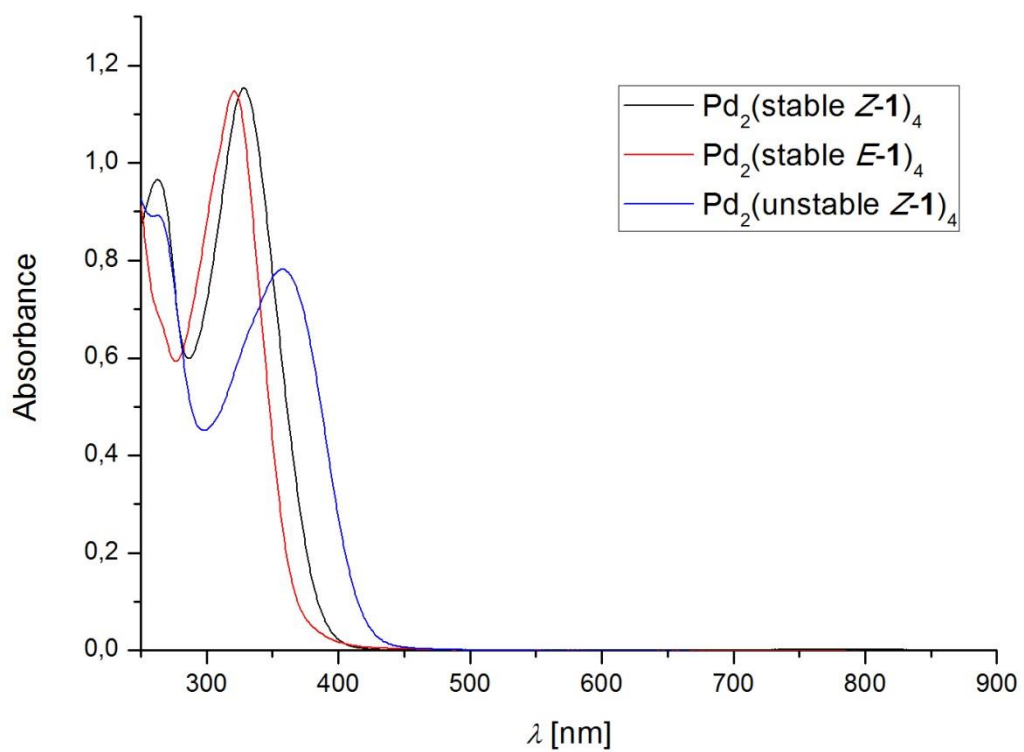

**Figure S10:** UV-vis spectra of switching cycle of ligand isomers in acetonitrile,  $c = 1.1 \times 10^{-5} M$ .

## VI. X-ray crystallography

A single crystal of Pd<sub>2</sub>(stable *E-1*)<sub>4</sub> formed from a racemic mixture of ligand *E-1* suitable for X-ray structure determination was grown by vapor diffusion of a 1:1 mixture of benzene and diethyl ether into a solution of the cage in a 1:1 mixture of acetonitrile and chloroform. Refinement of the structure indicated a significant amount of smeared out electron density, suggesting the presence of severely disordered solvent and/or anions. No satisfactory model was found to describe this density. Its contribution was removed using the PLATON/SQUEEZE routine,<sup>3</sup> which resulted in a solvent accessible volume of 2514 Å<sup>3</sup> containing 650 electrons. It is likely that this volume contains also disordered anions, as required for charge balance.

|                         |                                                                                                       |
|-------------------------|-------------------------------------------------------------------------------------------------------|
| Formula                 | C <sub>69</sub> H <sub>69.5</sub> Cl <sub>0.5</sub> N <sub>5</sub> O <sub>1.5</sub> Pd <sub>0.5</sub> |
| M <sub>r</sub>          | 1116.92                                                                                               |
| Cryst syst              | Tetragonal                                                                                            |
| Color, habit            | colourless, platelet                                                                                  |
| Size                    | .09 x 0.07 x 0.01                                                                                     |
| Space group             | P 4/n                                                                                                 |
| a (Å)                   | 18.8017                                                                                               |
| b (Å)                   | 18.8017                                                                                               |
| c (Å)                   | 21.2886                                                                                               |
| V (Å <sup>3</sup> )     | 7525.6                                                                                                |
| Z                       | 4                                                                                                     |
| ρ                       | 0.986                                                                                                 |
| μ                       | 2.439                                                                                                 |
| F(000)                  | 2340                                                                                                  |
| Temp (K)                | 100                                                                                                   |
| θ range (deg)           | 3.136 - 65.212                                                                                        |
| Data collected (h,k,l)  | -13:21, -22:22, -25:25                                                                                |
| No. of rflns collected  | 40448                                                                                                 |
| No. of indepndt reflns  | 6444                                                                                                  |
| Observed rflns          | 5358                                                                                                  |
| R(F) (%)                | 4.52                                                                                                  |
| wR(F <sup>2</sup> ) (%) | 11.23                                                                                                 |
| Goof                    | 1.093                                                                                                 |
| Weighting a,b           | 0.0459, 12.4612                                                                                       |
| Params refined          | 365                                                                                                   |
| Restraints              | 0                                                                                                     |
| Min max resid dens      | -0.668, 1.102                                                                                         |

<sup>3</sup> Spek, A. L. (2015). Acta Cryst. C71, 9-18.

## VII. Computational details

Computational studies were performed using the Gaussian09 program.<sup>4</sup> Geometries were initially optimized at the semi-empirical PM6 level to obtain the global minima. The geometries were further optimized at the B3LYP/6-31G(d) level for C,H,N and LANL2DZ with ECP for Pd in the gas phase without counterions, using a superfine grid and tight convergence criteria. Subsequent frequency analysis was performed to ensure a global minimum was achieved.

| Isomer                                | Relative Gibbs free energy (kJ mol <sup>-1</sup> ) |
|---------------------------------------|----------------------------------------------------|
| (S,S) <sub>4</sub>                    | 0                                                  |
| (S,S) <sub>3</sub> (R,R)              | +18.5                                              |
| (S,S) <sub>2</sub> (R,R) <sub>2</sub> | +27.4                                              |
| (S,S)(R,R)(S,S)(R,R)                  | +32.4                                              |

Table S1: Relative energies of diastereomers of Pd<sub>2</sub>(stable Z-1)<sub>4</sub>

| Isomer                                | Relative Gibbs free energy (kJ mol <sup>-1</sup> ) |
|---------------------------------------|----------------------------------------------------|
| (S,S) <sub>4</sub>                    | 0                                                  |
| (S,S) <sub>3</sub> (R,R)              | +60.9                                              |
| (S,S) <sub>2</sub> (R,R) <sub>2</sub> | +75.8                                              |
| (S,S)(R,R)(S,S)(R,R)                  | +113.8                                             |

Table S2: Relative energies of diastereomers of Pd<sub>2</sub>(stable E-1)<sub>4</sub>

---

<sup>4</sup> Gaussian 09, Revision D.01, Frisch, M. J.; Trucks, G. W.; Schlegel, H. B.; Scuseria, G. E.; Robb, M. A.; Cheeseman, J. R.; Scalmani, G.; Barone, V.; Mennucci, B.; Petersson, G. A.; Nakatsuji, H.; Caricato, M.; Li, X.; Hratchian, H. P.; Izmaylov, A. F.; Bloino, J.; Zheng, G.; Sonnenberg, J. L.; Hada, M.; Ehara, M.; Toyota, K.; Fukuda, R.; Hasegawa, J.; Ishida, M.; Nakajima, T.; Honda, Y.; Kitao, O.; Nakai, H.; Vreven, T.; Montgomery, J. A., Jr.; Peralta, J. E.; Ogliaro, F.; Bearpark, M.; Heyd, J. J.; Brothers, E.; Kudin, K. N.; Staroverov, Keith, T.; V. N.; Kobayashi, R.; Normand, J.; Raghavachari, K.; Rendell, A.; Burant, J. C.; Iyengar, S. S.; Tomasi, J.; Cossi, M.; Rega, N.; Millam, J. M.; Klene, M.; Knox, J. E.; Cross, J. B.; Bakken, V.; Adamo, C.; Jaramillo, J.; Gomperts, R.; Stratmann, R. E.; Yazyev, O.; Austin, A. J.; Cammi, R.; Pomelli, C.; Ochterski, J. W.; Martin, R. L.; Morokuma, K.; Zakrzewski, V. G.; Voth, G. A.; Salvador, P.; Dannenberg, J. J.; Dapprich, S.; Daniels, A. D.; Farkas, O.; Foresman, J. B.; Ortiz, J. V.; Cioslowski, J.; Fox, D. J. Gaussian, Inc., Wallingford CT, **2013**.

# $\text{Pd}_2(\text{stable Z-1})_4$

$(S,S)_4$   
 $0 \text{ kJ mol}^{-1}$

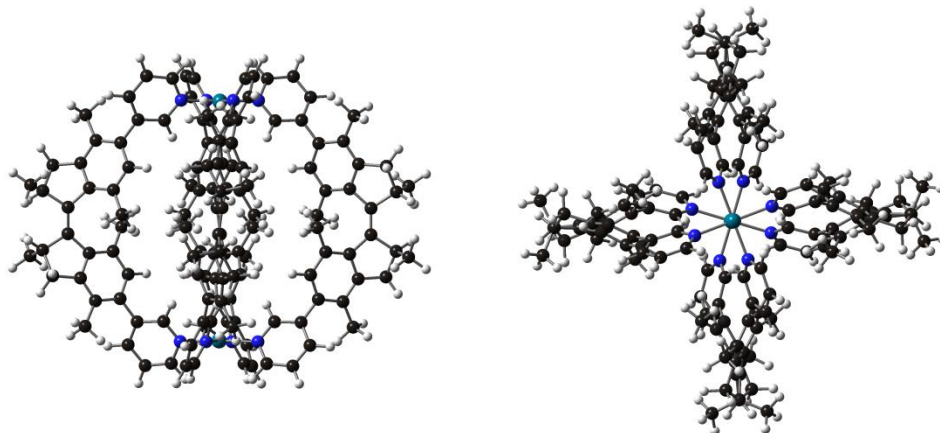

$(S,S)_3(R,R)$   
 $+18.5 \text{ kJ mol}^{-1}$

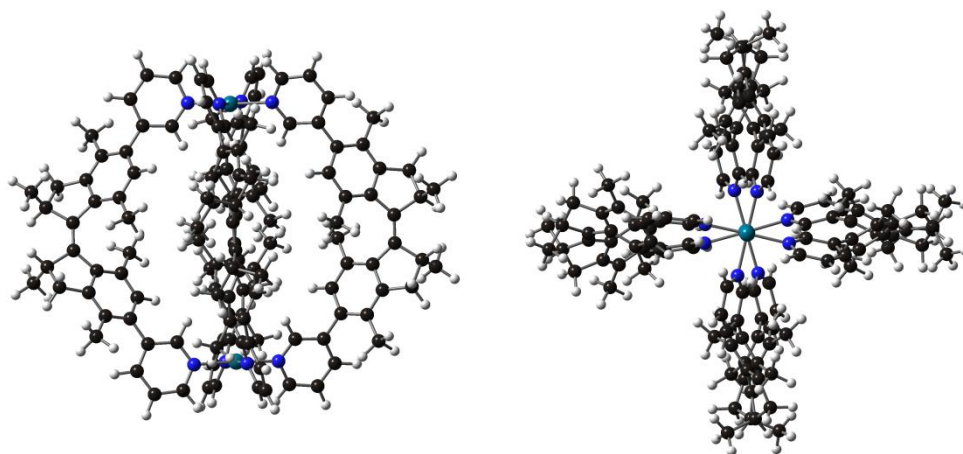

$(S,S)_2(R,R)_2$   
 $+27.4 \text{ kJ mol}^{-1}$

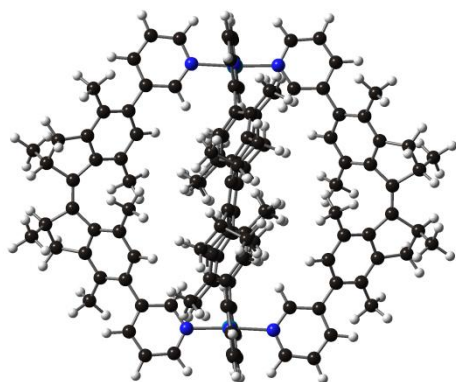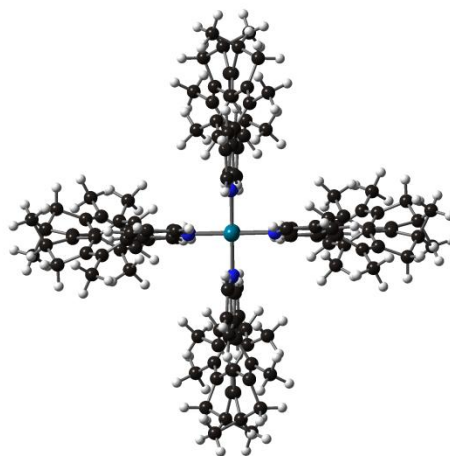

$(S,S)(R,R)(S,S)(R,R)$   
 $+32.4 \text{ kJ mol}^{-1}$

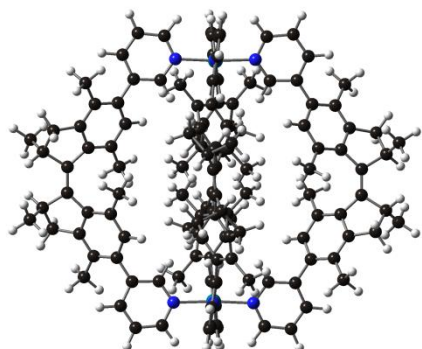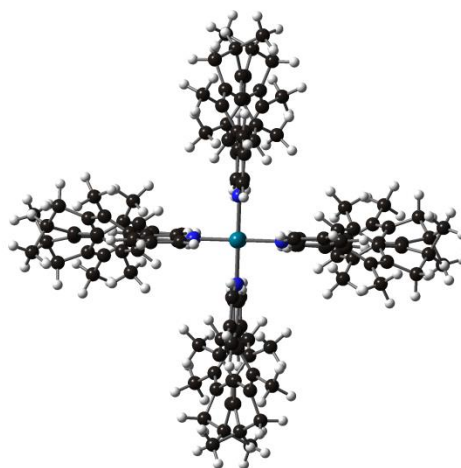

**Pd<sub>2</sub>(stable E-1)<sub>4</sub>**  
(*S,S*)<sub>4</sub>  
0 kJ mol<sup>-1</sup>

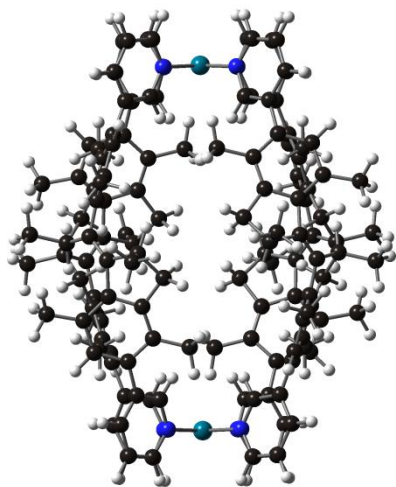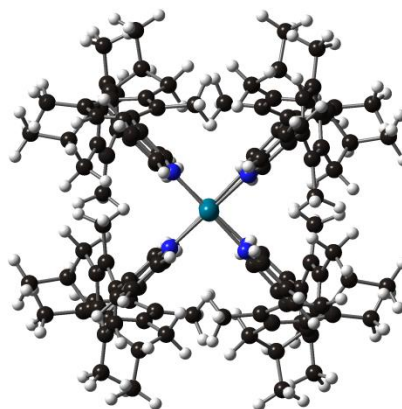

(*S,S*)<sub>3</sub>(*R,R*)  
+60.9 kJ mol<sup>-1</sup>

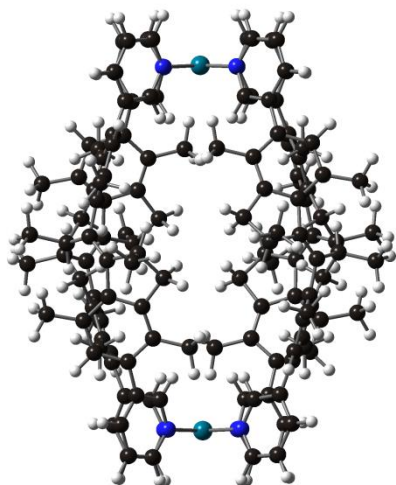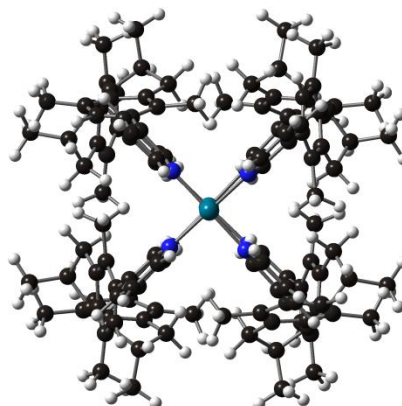

$(S,S)_2(R,R)_2$   
+75.8 kJ mol<sup>-1</sup>

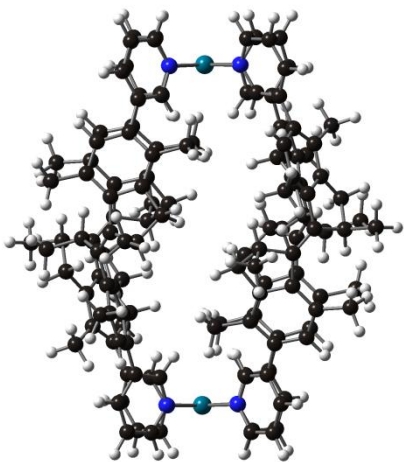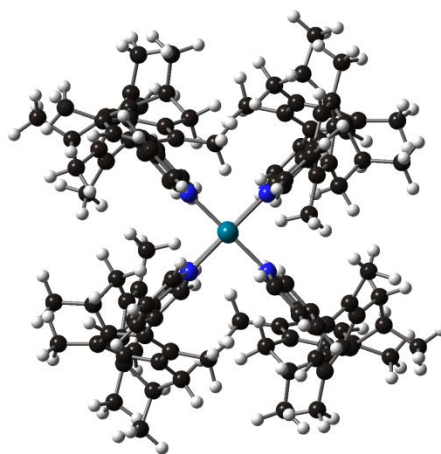

$(S,S)(R,R)(S,S)(R,R)$   
+113.8 kJ mol<sup>-1</sup>

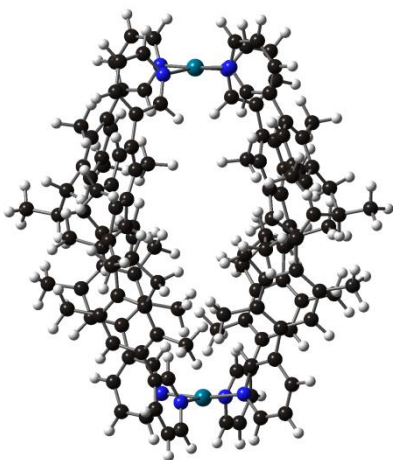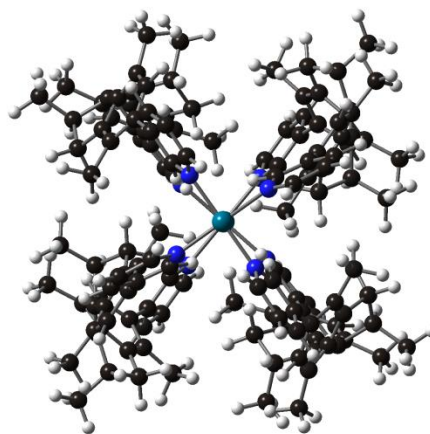

### Pd<sub>2</sub>(unstable Z-1)<sub>4</sub>

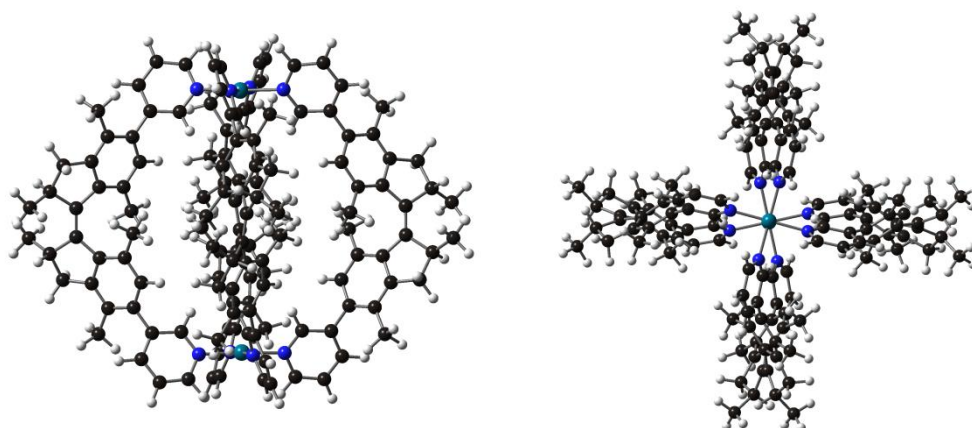

## VIII. Cartesian coordinates of DFT optimized structures

Cartesian coordinates of all the optimized structures are given, including the sum of electronic and thermal free energies in hartree.

### Pd<sub>2</sub>(stable Z-1)<sub>4</sub>

(S,S)<sub>4</sub>

Sum of electronic and thermal free energies: -5952.794672

|   |              |             |             |
|---|--------------|-------------|-------------|
| H | -0.417613000 | 2.408444000 | 3.939692000 |
| C | 7.362026000  | 1.467379000 | 3.841119000 |
| H | 8.266592000  | 1.350112000 | 4.428528000 |
| C | 0.316766000  | 2.297502000 | 4.745649000 |
| C | 7.243875000  | 0.808008000 | 2.623362000 |
| H | 8.034382000  | 0.171939000 | 2.241854000 |
| H | 2.679973000  | 1.455005000 | 3.805282000 |
| C | 6.306585000  | 2.255771000 | 4.291550000 |
| C | 2.722108000  | 2.514278000 | 4.052053000 |
| N | 6.134084000  | 0.929175000 | 1.864896000 |
| H | 6.375145000  | 2.759300000 | 5.250227000 |



|   |              |             |             |
|---|--------------|-------------|-------------|
| H | -0.188806000 | 2.589525000 | 5.671625000 |
| C | 1.557843000  | 3.128699000 | 4.528953000 |
| C | 5.137376000  | 2.382854000 | 3.519991000 |
| C | 5.111410000  | 1.694595000 | 2.299162000 |
| H | 0.577070000  | 1.236074000 | 4.819314000 |
| C | 3.962214000  | 3.170963000 | 3.971652000 |
| H | 1.018349000  | 7.357545000 | 6.429288000 |
| H | 4.251872000  | 1.774467000 | 1.643220000 |
| C | 1.657636000  | 4.489163000 | 4.894442000 |
| C | 0.674651000  | 5.408833000 | 5.506801000 |
| C | 4.079361000  | 4.515780000 | 4.401129000 |
| C | 2.919805000  | 5.126746000 | 4.879933000 |
| C | 1.508367000  | 6.384279000 | 6.351806000 |
| H | 5.186728000  | 6.333621000 | 4.045977000 |
| C | 5.372319000  | 5.301734000 | 4.359970000 |
| C | 2.813251000  | 6.494620000 | 5.515093000 |
| H | 0.880383000  | 5.705866000 | 8.341766000 |
| H | 3.682877000  | 6.750355000 | 6.129152000 |
| H | 6.101477000  | 4.875345000 | 3.665765000 |
| C | 1.801580000  | 5.858691000 | 7.770434000 |
| H | 2.420875000  | 6.574899000 | 8.321323000 |
| H | 5.849110000  | 5.357550000 | 5.347693000 |
| H | 2.714347000  | 7.279620000 | 4.751288000 |
| H | 2.335844000  | 4.902200000 | 7.736237000 |
| H | -1.018615000 | 6.463737000 | 7.326981000 |
| H | -5.186851000 | 4.075404000 | 6.313544000 |
| H | -2.714407000 | 4.785208000 | 7.256418000 |
| H | -2.421365000 | 8.352195000 | 6.536156000 |
| C | -1.508658000 | 6.381964000 | 6.354081000 |
| C | -5.372438000 | 4.384916000 | 5.280301000 |
| C | -1.802039000 | 7.798256000 | 5.822331000 |
| H | -0.880905000 | 8.369012000 | 5.666991000 |
| C | -2.813447000 | 5.545581000 | 6.468110000 |
| H | -6.101548000 | 3.688831000 | 4.856901000 |
| H | -4.251608000 | 1.652247000 | 1.766038000 |
| C | -2.919985000 | 4.904455000 | 5.103018000 |
| C | -5.111231000 | 2.307681000 | 1.682965000 |
| C | -4.079476000 | 4.422785000 | 4.494187000 |
| N | -6.133863000 | 1.869549000 | 0.919694000 |
| C | -0.674898000 | 5.532795000 | 5.382295000 |
| C | -1.657857000 | 4.916395000 | 4.465316000 |
| C | -3.962276000 | 3.987398000 | 3.151276000 |
| C | -5.137357000 | 3.531836000 | 2.365283000 |
| H | -5.849293000 | 5.372841000 | 5.331827000 |
| C | -2.722232000 | 4.065223000 | 2.494160000 |
| C | -1.558052000 | 4.545078000 | 3.106439000 |
| H | 0.417668000  | 3.953427000 | 2.388892000 |
| H | -2.336332000 | 7.759842000 | 4.866016000 |

|   |              |              |              |
|---|--------------|--------------|--------------|
| H | -3.683135000 | 6.160641000  | 6.721208000  |
| C | -6.306654000 | 4.302626000  | 2.234455000  |
| C | -7.362007000 | 3.848272000  | 1.448193000  |
| C | -0.317059000 | 4.758548000  | 2.274290000  |
| H | -2.680101000 | 3.813804000  | 1.435980000  |
| H | 0.188108000  | 5.686047000  | 2.562166000  |
| H | -6.375340000 | 5.263697000  | 2.733389000  |
| H | -8.266630000 | 4.435009000  | 1.328035000  |
| H | -0.577360000 | 4.827333000  | 1.212536000  |
| H | -8.034146000 | -2.242656000 | -0.160641000 |
| C | -7.243695000 | -2.627338000 | -0.794865000 |
| N | -6.133848000 | -1.869562000 | -0.919773000 |
| C | -7.361982000 | -3.848287000 | -1.448290000 |
| C | -5.111207000 | -2.307692000 | -1.683033000 |
| H | -8.266605000 | -4.435025000 | -1.328143000 |
| H | -4.251585000 | -1.652253000 | -1.766097000 |
| C | -6.306619000 | -4.302637000 | -2.234542000 |
| C | -5.137323000 | -3.531844000 | -2.365354000 |
| H | -2.680074000 | -3.813814000 | -1.436030000 |
| H | -6.375298000 | -5.263705000 | -2.733480000 |
| N | 6.134114000  | -0.929198000 | -1.864822000 |
| C | -2.722196000 | -4.065228000 | -2.494211000 |
| C | -3.962233000 | -3.987400000 | -3.151338000 |
| H | 4.251888000  | -1.774470000 | -1.643187000 |
| C | 5.111441000  | -1.694607000 | -2.299111000 |
| H | 8.034428000  | -0.171982000 | -2.241739000 |
| H | 0.417705000  | -3.953429000 | -2.388915000 |
| C | 7.243923000  | -0.808043000 | -2.623264000 |
| H | -0.417553000 | -2.408404000 | -3.939770000 |
| H | -0.577334000 | -4.827342000 | -1.212573000 |
| H | -6.101496000 | -3.688838000 | -4.856973000 |
| C | -0.317023000 | -4.758551000 | -2.274324000 |
| H | 2.680040000  | -1.454997000 | -3.805289000 |
| C | -1.558010000 | -4.545078000 | -3.106483000 |
| C | -4.079421000 | -4.422782000 | -4.494252000 |
| C | 0.316848000  | -2.297474000 | -4.745709000 |
| C | -5.372377000 | -4.384912000 | -5.280375000 |
| H | 0.577165000  | -1.236049000 | -4.819373000 |
| C | 2.722171000  | -2.514270000 | -4.052054000 |
| C | 5.137428000  | -2.382869000 | -3.519938000 |
| C | 7.362095000  | -1.467418000 | -3.841017000 |
| H | 0.188147000  | -5.686049000 | -2.562200000 |
| C | 1.557910000  | -3.128683000 | -4.528976000 |
| H | -0.188703000 | -2.589496000 | -5.671696000 |
| H | -5.186786000 | -4.075387000 | -6.313613000 |
| C | -1.657801000 | -4.916386000 | -4.465363000 |
| H | -5.849225000 | -5.372840000 | -5.331915000 |
| C | -2.919924000 | -4.904446000 | -5.103076000 |

|   |              |              |              |
|---|--------------|--------------|--------------|
| C | 3.962269000  | -3.170967000 | -3.971623000 |
| C | 6.306656000  | -2.255800000 | -4.291470000 |
| H | 8.266676000  | -1.350163000 | -4.428406000 |
| C | 1.657698000  | -4.489150000 | -4.894455000 |
| C | 4.079414000  | -4.515787000 | -4.401094000 |
| C | -0.674833000 | -5.532778000 | -5.382337000 |
| C | -2.813373000 | -5.545565000 | -6.468170000 |
| H | 6.375233000  | -2.759333000 | -5.250144000 |
| H | -2.336265000 | -7.759834000 | -4.866084000 |
| C | 2.919862000  | -5.126743000 | -4.879919000 |
| C | 0.674718000  | -5.408816000 | -5.506827000 |
| H | -2.714329000 | -4.785189000 | -7.256473000 |
| H | 6.101509000  | -4.875366000 | -3.665684000 |
| H | -3.683057000 | -6.160626000 | -6.721278000 |
| C | 5.372365000  | -5.301749000 | -4.359908000 |
| C | -1.508582000 | -6.381943000 | -6.354134000 |
| C | -1.801964000 | -7.798241000 | -5.822395000 |
| H | 5.186760000  | -6.333636000 | -4.045923000 |
| C | 2.813311000  | -6.494618000 | -5.515080000 |
| H | 2.714385000  | -7.279617000 | -4.751277000 |
| C | 1.508442000  | -6.384267000 | -6.351818000 |
| H | -0.880828000 | -8.368993000 | -5.667050000 |
| H | -2.421282000 | -8.352177000 | -6.536229000 |
| H | 5.849179000  | -5.357563000 | -5.347619000 |
| H | -1.018530000 | -6.463710000 | -7.327031000 |
| H | 2.335954000  | -4.902192000 | -7.736233000 |
| C | 1.801686000  | -5.858679000 | -7.770440000 |
| H | 1.018420000  | -7.357530000 | -6.429311000 |
| H | 3.682945000  | -6.750359000 | -6.129123000 |
| H | 0.880499000  | -5.705849000 | -8.341789000 |
| H | 2.420986000  | -6.574891000 | -8.321319000 |
| H | 5.186767000  | -4.046018000 | 6.333632000  |
| H | 2.714376000  | -4.751349000 | 7.279622000  |
| C | 5.372356000  | -4.360011000 | 5.301745000  |
| H | 6.101518000  | -3.665810000 | 4.875356000  |
| H | 5.849140000  | -5.347736000 | 5.357559000  |
| H | 3.682902000  | -6.129210000 | 6.750345000  |
| C | 2.813280000  | -5.515145000 | 6.494614000  |
| H | -0.880908000 | -5.667053000 | 8.368979000  |
| H | 1.018370000  | -6.429340000 | 7.357524000  |
| C | 4.079398000  | -4.401161000 | 4.515790000  |
| C | -1.802034000 | -5.822395000 | 7.798211000  |
| C | 1.508391000  | -6.351853000 | 6.384261000  |
| C | 2.919840000  | -4.879971000 | 5.126746000  |
| H | -2.421364000 | -6.536227000 | 8.352137000  |
| H | -2.336333000 | -4.866083000 | 7.759796000  |
| H | 6.375216000  | -5.250199000 | 2.759349000  |
| H | 2.420892000  | -8.321375000 | 6.574871000  |

|   |              |              |              |
|---|--------------|--------------|--------------|
| H | 8.266667000  | -4.428463000 | 1.350185000  |
| C | 6.306644000  | -4.291524000 | 2.255816000  |
| C | 7.362088000  | -3.841072000 | 1.467440000  |
| H | 0.188122000  | -2.562203000 | 5.686043000  |
| H | -0.577350000 | -1.212572000 | 4.827334000  |
| C | 1.801602000  | -7.770479000 | 5.858665000  |
| C | 0.674683000  | -5.506839000 | 5.408816000  |
| C | 3.962256000  | -3.971668000 | 3.170978000  |
| C | 5.137419000  | -3.519986000 | 2.382885000  |
| C | 7.243922000  | -2.623315000 | 0.808067000  |
| C | -0.317039000 | -2.274323000 | 4.758541000  |
| C | 1.657674000  | -4.894473000 | 4.489157000  |
| C | -1.508633000 | -6.354134000 | 6.381918000  |
| C | -0.674867000 | -5.382337000 | 5.532767000  |
| H | -1.018585000 | -7.327031000 | 6.463690000  |
| H | 8.034430000  | -2.241793000 | 0.172010000  |
| C | 5.111440000  | -2.299157000 | 1.694629000  |
| N | 6.134115000  | -1.864869000 | 0.929222000  |
| H | 2.335868000  | -7.736278000 | 4.902176000  |
| H | 0.880402000  | -8.341806000 | 5.705834000  |
| H | 0.417697000  | -2.388910000 | 3.953426000  |
| C | -1.657824000 | -4.465360000 | 4.916360000  |
| C | -1.558024000 | -3.106480000 | 4.545052000  |
| C | 2.722153000  | -4.052065000 | 2.514285000  |
| C | 1.557886000  | -4.528971000 | 3.128697000  |
| H | 4.251889000  | -1.643230000 | 1.774491000  |
| C | -2.813411000 | -6.468164000 | 5.545519000  |
| H | -3.683105000 | -6.721272000 | 6.160568000  |
| C | -2.919948000 | -5.103069000 | 4.904403000  |
| C | -2.722202000 | -2.494204000 | 4.065190000  |
| H | 8.034459000  | 2.241746000  | -0.171933000 |
| H | -2.680075000 | -1.436022000 | 3.813783000  |
| H | 2.680022000  | -3.805278000 | 1.455017000  |
| C | 7.243957000  | 2.623278000  | -0.807993000 |
| C | 0.316807000  | -4.745650000 | 2.297498000  |
| H | 8.266726000  | 4.428412000  | -1.350109000 |
| C | 7.362140000  | 3.841032000  | -1.467366000 |
| H | -2.714358000 | -7.256466000 | 4.785142000  |
| C | -4.079439000 | -4.494240000 | 4.422728000  |
| N | 6.134141000  | 1.864846000  | -0.929150000 |
| C | -3.962242000 | -3.151324000 | 3.987352000  |
| H | -0.188770000 | -5.671626000 | 2.589510000  |
| H | -0.417567000 | -3.939689000 | 2.408451000  |
| H | -5.849256000 | -5.331899000 | 5.372763000  |
| C | 5.111474000  | 2.299146000  | -1.694560000 |
| C | 6.306705000  | 4.291497000  | -2.255745000 |
| H | 0.577195000  | 4.819384000  | -1.235999000 |
| C | -5.372395000 | -5.280360000 | 4.384841000  |

|   |              |              |              |
|---|--------------|--------------|--------------|
| H | -6.375300000 | -2.733446000 | 5.263661000  |
| C | -5.137326000 | -2.365330000 | 3.531795000  |
| H | 2.680081000  | 3.805316000  | -1.454945000 |
| H | 0.577110000  | -4.819304000 | 1.236069000  |
| C | -6.306620000 | -2.234508000 | 4.302592000  |
| C | 5.137470000  | 3.519975000  | -2.382816000 |
| H | 6.375290000  | 5.250172000  | -2.759277000 |
| H | 4.251914000  | 1.643231000  | -1.774423000 |
| C | 2.722213000  | 4.052092000  | -2.514217000 |
| C | -5.111207000 | -1.683009000 | 2.307644000  |
| C | 0.316883000  | 4.745724000  | -2.297425000 |
| H | -5.186802000 | -6.313599000 | 4.075321000  |
| H | -4.251588000 | -1.766078000 | 1.652204000  |
| C | -7.361977000 | -1.448248000 | 3.848245000  |
| C | 3.962313000  | 3.971672000  | -3.170911000 |
| H | -6.101504000 | -4.856958000 | 3.688757000  |
| H | -0.417508000 | 3.939777000  | -2.408363000 |
| C | 1.557952000  | 4.529010000  | -3.128630000 |
| H | -8.266597000 | -1.328093000 | 4.434986000  |
| H | -0.188678000 | 5.671707000  | -2.589443000 |
| N | -6.133843000 | -0.919741000 | 1.869517000  |
| C | -7.243688000 | -0.794823000 | 2.627296000  |
| H | 2.335967000  | 7.736286000  | -4.902121000 |
| C | 4.079460000  | 4.401153000  | -4.515726000 |
| H | -4.251565000 | 1.766073000  | -1.652247000 |
| C | 1.657741000  | 4.894497000  | -4.489095000 |
| C | 1.801702000  | 7.770491000  | -5.858611000 |
| H | -8.034134000 | -0.160593000 | 2.242618000  |
| H | 6.101562000  | 3.665759000  | -4.875300000 |
| N | -6.133813000 | 0.919728000  | -1.869595000 |
| C | -5.111172000 | 1.683001000  | -2.307703000 |
| H | 0.880508000  | 8.341828000  | -5.705782000 |
| C | 5.372415000  | 4.359979000  | -5.301684000 |
| C | 2.919907000  | 4.879975000  | -5.126684000 |
| H | 5.849223000  | 5.347695000  | -5.357492000 |
| H | -5.186755000 | 6.313596000  | -4.075355000 |
| H | 2.420999000  | 8.321380000  | -6.574817000 |
| H | -2.714304000 | 7.256479000  | -4.785130000 |
| H | 0.417757000  | 2.388927000  | -3.953397000 |
| C | -7.243644000 | 0.794808000  | -2.627394000 |
| C | 0.674757000  | 5.506864000  | -5.408761000 |
| C | -5.137273000 | 2.365325000  | -3.531853000 |
| H | -8.034096000 | 0.160575000  | -2.242730000 |
| C | -3.962185000 | 3.151326000  | -3.987387000 |
| H | -6.101459000 | 4.856949000  | -3.688816000 |
| C | -2.722141000 | 2.494210000  | -4.065210000 |
| C | -5.372340000 | 5.280358000  | -4.384887000 |
| C | -4.079379000 | 4.494243000  | -4.422756000 |

|    |              |              |              |
|----|--------------|--------------|--------------|
| C  | -1.557957000 | 3.106495000  | -4.545047000 |
| C  | 1.508477000  | 6.351868000  | -6.384205000 |
| C  | -1.657756000 | 4.465377000  | -4.916344000 |
| C  | -2.919883000 | 5.103080000  | -4.904406000 |
| C  | 2.813355000  | 5.515144000  | -6.494555000 |
| H  | -2.680013000 | 1.436026000  | -3.813809000 |
| C  | -0.674791000 | 5.382362000  | -5.532728000 |
| C  | -0.316965000 | 2.274344000  | -4.758525000 |
| H  | 3.682985000  | 6.129197000  | -6.750289000 |
| C  | -2.813339000 | 6.468181000  | -5.545513000 |
| H  | 5.186817000  | 4.045998000  | -6.333573000 |
| C  | -7.361914000 | 1.448235000  | -3.848344000 |
| C  | -6.306552000 | 2.234500000  | -4.302671000 |
| H  | 0.188209000  | 2.562235000  | -5.686016000 |
| C  | -1.508544000 | 6.354161000  | -6.381887000 |
| H  | -1.018498000 | 7.327062000  | -6.463644000 |
| H  | -5.849184000 | 5.331902000  | -5.372815000 |
| H  | 1.018457000  | 6.429359000  | -7.357470000 |
| H  | -3.683023000 | 6.721288000  | -6.160577000 |
| H  | -8.266524000 | 1.328079000  | -4.435100000 |
| H  | -0.577270000 | 1.212593000  | -4.827332000 |
| H  | 2.714442000  | 4.751345000  | -7.279560000 |
| H  | -6.375218000 | 2.733440000  | -5.263739000 |
| C  | -1.801915000 | 5.822433000  | -7.798191000 |
| H  | -2.336209000 | 4.866117000  | -7.759795000 |
| H  | -0.880776000 | 5.667100000  | -8.368941000 |
| H  | -2.421236000 | 6.536266000  | -8.352124000 |
| Pd | -6.086900000 | -0.000007000 | -0.000039000 |
| Pd | 6.087186000  | -0.000011000 | 0.000036000  |
| C  | -7.243711000 | 2.627323000  | 0.794772000  |
| H  | -8.034153000 | 2.242640000  | 0.160539000  |

(S,S)<sub>3</sub>(R,R)

Sum of electronic and thermal free energies: -5952.787609

|   |             |              |              |
|---|-------------|--------------|--------------|
| C | 4.777713000 | -5.817628000 | -0.257635000 |
| C | 4.569209000 | -4.582629000 | 0.405015000  |
| C | 3.321424000 | -4.302727000 | 0.989151000  |
| C | 2.237234000 | -5.187484000 | 0.946746000  |
| C | 2.426897000 | -6.395730000 | 0.240601000  |
| C | 3.700963000 | -6.704241000 | -0.289606000 |
| H | 3.215346000 | -3.389163000 | 1.571239000  |
| C | 0.994977000 | -4.877546000 | 1.745918000  |
| H | 1.215125000 | -4.137993000 | 2.523258000  |
| H | 0.612021000 | -5.780250000 | 2.232832000  |
| H | 0.178336000 | -4.484568000 | 1.129571000  |
| C | 6.081278000 | -6.207846000 | -0.921093000 |
| H | 6.673248000 | -6.888842000 | -0.295059000 |
| H | 6.709393000 | -5.343852000 | -1.154147000 |

|   |              |               |              |
|---|--------------|---------------|--------------|
| H | 5.891463000  | -6.736315000  | -1.860465000 |
| C | 3.715143000  | -8.127757000  | -0.798901000 |
| C | 1.555625000  | -7.580384000  | 0.086724000  |
| C | 2.517062000  | -8.771511000  | -0.046945000 |
| H | 4.659620000  | -8.644508000  | -0.600070000 |
| H | 3.549330000  | -8.162408000  | -1.885497000 |
| C | 2.960466000  | -9.349513000  | 1.310993000  |
| H | 2.073484000  | -9.571446000  | -0.644196000 |
| H | 3.453876000  | -8.586859000  | 1.924447000  |
| H | 3.665446000  | -10.174518000 | 1.161520000  |
| H | 2.110020000  | -9.737013000  | 1.881019000  |
| C | 5.663952000  | -3.598854000  | 0.599845000  |
| C | 6.913269000  | -3.955491000  | 1.139510000  |
| C | 7.891262000  | -2.986992000  | 1.346341000  |
| C | 7.614551000  | -1.664761000  | 1.020354000  |
| N | 6.424207000  | -1.306530000  | 0.496194000  |
| C | 5.478309000  | -2.244777000  | 0.287455000  |
| H | 4.547800000  | -1.907545000  | -0.155548000 |
| H | 7.105260000  | -4.987247000  | 1.414215000  |
| H | 8.856730000  | -3.244238000  | 1.769008000  |
| H | 8.340679000  | -0.876044000  | 1.180128000  |
| H | 0.744973000  | -5.798906000  | -2.181354000 |
| H | -3.987565000 | -2.841053000  | 0.131300000  |
| C | -4.808495000 | -3.391478000  | -0.314389000 |
| N | -5.944169000 | -2.700679000  | -0.545276000 |
| H | -2.595413000 | -9.427755000  | 0.703668000  |
| H | -1.425187000 | -9.153485000  | -1.824233000 |
| C | 0.172429000  | -4.993777000  | -1.709624000 |
| H | -4.933152000 | -8.168615000  | 0.364896000  |
| H | -0.199409000 | -4.332559000  | -2.499717000 |
| C | -0.975794000 | -5.554013000  | -0.906343000 |
| C | -2.227047000 | -4.928345000  | -0.966268000 |
| C | 0.206058000  | -7.728458000  | -0.006702000 |
| H | -2.320154000 | -4.023594000  | -1.564288000 |
| C | -0.900666000 | -6.762935000  | -0.179779000 |
| C | -3.387043000 | -5.464794000  | -0.381049000 |
| C | -4.672864000 | -4.756538000  | -0.604789000 |
| C | -7.011489000 | -3.334209000  | -1.073817000 |
| C | -3.323583000 | -6.702886000  | 0.305368000  |
| C | -2.079342000 | -7.331829000  | 0.355786000  |
| C | -4.513606000 | -7.357171000  | 0.974474000  |
| H | -5.320587000 | -6.649494000  | 1.182423000  |
| C | -1.785889000 | -8.714941000  | 0.891147000  |
| C | -0.779929000 | -9.780586000  | -1.198269000 |
| H | -7.899983000 | -2.739803000  | -1.251992000 |
| C | -0.475239000 | -9.096968000  | 0.148768000  |
| H | 0.881401000  | -4.421938000  | -1.100240000 |
| C | -5.798124000 | -5.400544000  | -1.151063000 |

|   |              |               |              |
|---|--------------|---------------|--------------|
| C | -6.970880000 | -4.688360000  | -1.382867000 |
| H | 0.135541000  | -9.984714000  | -1.762693000 |
| H | -1.290058000 | -10.735887000 | -1.033487000 |
| H | -1.618771000 | -8.692789000  | 1.977860000  |
| H | -4.219300000 | -7.806109000  | 1.928239000  |
| H | -5.741830000 | -6.452481000  | -1.410143000 |
| H | -7.845045000 | -5.167759000  | -1.810626000 |
| H | 0.129543000  | -9.771500000  | 0.759178000  |
| H | -4.547797000 | 1.907506000   | -0.156045000 |
| N | -6.424202000 | 1.306663000   | 0.495862000  |
| C | -5.478305000 | 2.244855000   | 0.286874000  |
| H | -1.215116000 | 4.138667000   | 2.522178000  |
| H | -8.340672000 | 0.876357000   | 1.179914000  |
| C | -7.614544000 | 1.665031000   | 1.019932000  |
| H | 7.845038000  | 5.167279000   | -1.812016000 |
| H | -3.215339000 | 3.389580000   | 1.570357000  |
| C | -0.994970000 | 4.878012000   | 1.744640000  |
| C | 6.970875000  | 4.687994000   | -1.384124000 |
| H | 5.741829000  | 6.452111000   | -1.411858000 |
| C | -3.321418000 | 4.302991000   | 0.988028000  |
| H | -0.178332000 | 4.484869000   | 1.128396000  |
| C | -5.663946000 | 3.599014000   | 0.598911000  |
| C | 5.798122000  | 5.400242000   | -1.152502000 |
| H | -0.612011000 | 5.780847000   | 2.231312000  |
| C | -2.237229000 | 5.187738000   | 0.945389000  |
| C | -7.891253000 | 2.987348000   | 1.345574000  |
| C | -4.569204000 | 4.582738000   | 0.403820000  |
| C | 7.011483000  | 3.333925000   | -1.074718000 |
| H | 7.899975000  | 2.739470000   | -1.252742000 |
| H | 5.320591000  | 6.649812000   | 1.180660000  |
| H | -3.453874000 | 8.587368000   | 1.922194000  |
| C | -6.913261000 | 3.955792000   | 1.138486000  |
| H | 1.618780000  | 8.693321000   | 1.975562000  |
| C | 4.672864000  | 4.756382000   | -0.606051000 |
| C | 4.513610000  | 7.357434000   | 0.972525000  |
| H | -2.110018000 | 9.737510000   | 1.878463000  |
| C | -2.960464000 | 9.349861000   | 1.308540000  |
| C | -2.426893000 | 6.395798000   | 0.238925000  |
| H | 4.933156000  | 8.168716000   | 0.362730000  |
| H | -8.856721000 | 3.244705000   | 1.768175000  |
| C | -4.777709000 | 5.817561000   | -0.259156000 |
| C | 3.323585000  | 6.702972000   | 0.303594000  |
| C | 3.387044000  | 5.464698000   | -0.382494000 |
| N | 5.944166000  | 2.700537000   | -0.546003000 |
| C | 2.079345000  | 7.331928000   | 0.353849000  |
| C | 4.808494000  | 3.391398000   | -0.315292000 |
| C | -3.700962000 | 6.704167000   | -0.291362000 |
| C | 1.785894000  | 8.715182000   | 0.888843000  |



|   |              |              |              |
|---|--------------|--------------|--------------|
| C | 2.227045000  | 4.928092000  | -0.967565000 |
| H | -3.665444000 | 10.174827000 | 1.158851000  |
| H | -6.673248000 | 6.888760000  | -0.296853000 |
| C | -1.555623000 | 7.580411000  | 0.084734000  |
| C | 0.900666000  | 6.762891000  | -0.181559000 |
| C | -6.081277000 | 6.207601000  | -0.922711000 |
| C | 0.975792000  | 5.553775000  | -0.907802000 |
| H | -5.891468000 | 6.735827000  | -1.862222000 |
| H | 2.320150000  | 4.023182000  | -1.565346000 |
| C | -0.206057000 | 7.728460000  | -0.008736000 |
| H | -7.105251000 | 4.987620000  | 1.412920000  |
| H | -0.881401000 | 4.421646000  | -1.101386000 |
| H | 4.219306000  | 7.806626000  | 1.926171000  |
| C | -2.517062000 | 8.771502000  | -0.049247000 |
| H | 2.595417000  | 9.427946000  | 0.701170000  |
| C | -0.172435000 | 4.993324000  | -1.710927000 |
| C | 0.475241000  | 9.097012000  | 0.146367000  |
| H | -0.129539000 | 9.771706000  | 0.756600000  |
| C | -3.715143000 | 8.127549000  | -0.801032000 |
| H | 3.987565000  | 2.841092000  | 0.130547000  |
| H | 0.199401000  | 4.331896000  | -2.500846000 |
| H | -4.659620000 | 8.644351000  | -0.602336000 |
| H | -6.709392000 | 5.343546000  | -1.155537000 |
| H | -2.073485000 | 9.571280000  | -0.646709000 |
| H | -0.744982000 | 5.798326000  | -2.182868000 |
| H | -3.549332000 | 8.161914000  | -1.887637000 |
| C | 0.779926000  | 9.780271000  | -1.200852000 |
| H | 1.425184000  | 9.153004000  | -1.826651000 |
| H | 1.290053000  | 10.735617000 | -1.036327000 |
| H | -0.135545000 | 9.984247000  | -1.765329000 |
| H | 8.353309000  | 0.238268000  | -1.925058000 |
| H | 8.677585000  | -0.021612000 | -4.387069000 |
| C | 7.507794000  | 0.147895000  | -2.597914000 |
| C | 7.677097000  | -0.005661000 | -3.967766000 |
| H | 7.961291000  | 2.152210000  | 1.778129000  |
| N | 6.275884000  | 0.199272000  | -2.049541000 |
| C | 6.554908000  | -0.109501000 | -4.783918000 |
| H | 5.630951000  | -2.318283000 | -5.859145000 |
| C | 7.177838000  | 1.887523000  | 2.478991000  |
| H | 6.682204000  | -0.169350000 | -5.857744000 |
| H | 8.125988000  | 2.767643000  | 4.189323000  |
| C | 5.008740000  | -1.959508000 | -6.683596000 |
| C | 5.189777000  | 0.051644000  | -2.832209000 |
| H | 4.543437000  | -2.836510000 | -7.143097000 |
| C | 7.258980000  | 2.227518000  | 3.823866000  |
| C | 5.260486000  | -0.109551000 | -4.227284000 |
| N | 6.114588000  | 1.217967000  | 1.986910000  |
| H | 5.675130000  | -1.529143000 | -7.443353000 |

|   |              |              |              |
|---|--------------|--------------|--------------|
| H | 4.230007000  | 0.069171000  | -2.328802000 |
| C | 3.944557000  | -0.982785000 | -6.227377000 |
| C | 6.212615000  | 1.882449000  | 4.674344000  |
| C | 4.029027000  | -0.192537000 | -5.049141000 |
| C | 5.102475000  | 0.877469000  | 2.810956000  |
| H | 6.145355000  | -0.455137000 | 6.012177000  |
| H | 6.249154000  | 2.163639000  | 5.721519000  |
| C | 5.091654000  | 1.193111000  | 4.177066000  |
| H | 2.150988000  | -2.428466000 | -8.341721000 |
| H | 4.282088000  | 0.322760000  | 2.369425000  |
| C | 5.402469000  | -0.321721000 | 6.803141000  |
| H | 5.835444000  | 0.352268000  | 7.554369000  |
| C | 2.787308000  | -0.848327000 | -6.995708000 |
| C | 2.544314000  | -1.402426000 | -8.383052000 |
| C | 2.940623000  | 0.625750000  | -4.687885000 |
| H | 3.051869000  | 1.292705000  | -3.835720000 |
| H | 5.271356000  | -1.290781000 | 7.294622000  |
| H | 3.448381000  | -1.426467000 | -8.999724000 |
| C | 3.927268000  | 0.849113000  | 5.031798000  |
| C | 4.078857000  | 0.191819000  | 6.277808000  |
| C | 1.675487000  | -0.075293000 | -6.593954000 |
| C | 1.753024000  | 0.706577000  | -5.420471000 |
| C | 1.465225000  | -0.433095000 | -8.949496000 |
| C | 2.657007000  | 1.289848000  | 4.621512000  |
| H | 2.581946000  | 1.872680000  | 3.705352000  |
| H | 3.700258000  | -0.219129000 | 9.072225000  |
| C | 2.924616000  | 0.017579000  | 7.041887000  |
| C | 0.674738000  | -0.088238000 | -7.678746000 |
| H | 1.099630000  | 2.436181000  | -4.316304000 |
| C | 0.689410000  | 1.693828000  | -5.009613000 |
| H | -1.099656000 | -2.437348000 | -4.315663000 |
| C | 2.846166000  | -0.515244000 | 8.454599000  |
| H | 2.220347000  | 2.149735000  | 8.904508000  |
| H | 2.348840000  | 1.383630000  | 10.499543000 |
| C | 1.497084000  | 1.106287000  | 5.383917000  |
| H | 0.291458000  | 2.224779000  | -5.880665000 |
| H | 2.806146000  | -1.614195000 | 8.462618000  |
| C | 1.637617000  | 0.403397000  | 6.600848000  |
| C | -0.689435000 | -1.695181000 | -5.009170000 |
| C | 1.723475000  | 1.467721000  | 9.604097000  |
| H | -0.291490000 | -2.226366000 | -5.880083000 |
| C | -0.674758000 | 0.086190000  | -7.678768000 |
| H | -0.165021000 | 1.212634000  | -4.519517000 |
| H | 0.165001000  | -1.213863000 | -4.519205000 |
| C | 1.506428000  | 0.079935000  | 8.970363000  |
| H | 0.417504000  | 2.577119000  | 4.242716000  |
| C | 0.210876000  | 1.764057000  | 4.946909000  |
| H | 0.775625000  | 1.927550000  | 9.901545000  |

|   |              |              |              |
|---|--------------|--------------|--------------|
| C | 0.668783000  | 0.126481000  | 7.683069000  |
| C | -1.753045000 | -0.708033000 | -5.420285000 |
| H | -0.321057000 | 2.184442000  | 5.806497000  |
| C | -1.465245000 | 0.430716000  | -8.949608000 |
| C | -1.675507000 | 0.073530000  | -6.593973000 |
| H | 1.052737000  | -0.580966000 | 9.712484000  |
| H | 0.321072000  | -2.182898000 | 5.807079000  |
| H | 0.481420000  | -1.065506000 | 4.461838000  |
| C | -0.210866000 | -1.762747000 | 4.947379000  |
| H | -0.481413000 | 1.066684000  | 4.461560000  |
| C | -2.940642000 | -0.627010000 | -4.687718000 |
| C | -2.544331000 | 1.400197000  | -8.383417000 |
| H | -3.051890000 | -1.293740000 | -3.835378000 |
| H | -3.448398000 | 1.424081000  | -9.000095000 |
| C | -0.668766000 | -0.124442000 | 7.683104000  |
| C | -2.787325000 | 0.846462000  | -6.995928000 |
| H | -0.417497000 | -2.576001000 | 4.243408000  |
| C | -1.497072000 | -1.104858000 | 5.384215000  |
| C | -1.637601000 | -0.401645000 | 6.600959000  |
| H | -1.052714000 | 0.583547000  | 9.712331000  |
| C | -1.506407000 | -0.077551000 | 8.970387000  |
| C | -4.029044000 | 0.191187000  | -5.049187000 |
| H | -0.775602000 | -1.924918000 | 9.902062000  |
| H | -2.151002000 | 2.426248000  | -8.342354000 |
| C | -3.944573000 | 0.981125000  | -6.227631000 |
| C | -1.723452000 | -1.465168000 | 9.604493000  |
| C | -2.656996000 | -1.288620000 | 4.621861000  |
| H | -2.581938000 | -1.871696000 | 3.705855000  |
| H | -4.230017000 | -0.069795000 | -2.328779000 |
| C | -2.924599000 | -0.015710000 | 7.041898000  |
| H | -2.806127000 | 1.616443000  | 8.462195000  |
| C | -2.846146000 | 0.517490000  | 8.454468000  |
| C | -5.260501000 | 0.108423000  | -4.227305000 |
| H | -2.220326000 | -2.147369000 | 8.905087000  |
| C | -5.189788000 | -0.052401000 | -2.832188000 |
| C | -5.008753000 | 1.957732000  | -6.684105000 |
| H | -5.675143000 | 1.527170000  | -7.443750000 |
| H | -2.348816000 | -1.380838000 | 10.499918000 |
| C | -3.927257000 | -0.847775000 | 5.032033000  |
| C | -6.554925000 | 0.108226000  | -4.783935000 |
| H | -4.543448000 | 2.834613000  | -7.143834000 |
| C | -4.078842000 | -0.190150000 | 6.277869000  |
| H | -6.682223000 | 0.167787000  | -5.857778000 |
| H | -3.700237000 | 0.221538000  | 9.072175000  |
| N | -6.275894000 | -0.199816000 | -2.049477000 |
| H | -5.630963000 | 2.316725000  | -5.859748000 |
| H | -4.282080000 | -0.322127000 | 2.369519000  |
| C | -5.091643000 | -1.192000000 | 4.177393000  |

|    |              |              |               |
|----|--------------|--------------|---------------|
| C  | -5.102466000 | -0.876720000 | 2.811199000   |
| C  | -7.677112000 | 0.004607000  | -3.967753000  |
| C  | -7.507805000 | -0.148583000 | -2.597860000  |
| C  | -5.402453000 | 0.323530000  | 6.803067000   |
| H  | -6.145338000 | 0.456739000  | 6.012067000   |
| C  | -6.212604000 | -1.881207000 | 4.674855000   |
| H  | -6.249141000 | -2.162118000 | 5.722104000   |
| N  | -6.114579000 | -1.217440000 | 1.987245000   |
| H  | -8.677601000 | 0.020449000  | -4.387057000  |
| H  | -5.271338000 | 1.292719000  | 7.294293000   |
| C  | -7.258968000 | -2.226503000 | 3.824470000   |
| H  | -5.835429000 | -0.350260000 | 7.554471000   |
| C  | -7.177828000 | -1.886866000 | 2.479504000   |
| H  | -8.125976000 | -2.766531000 | 4.190072000   |
| H  | -7.961281000 | -2.151741000 | 1.778713000   |
| C  | -2.115470000 | -0.792107000 | -9.624492000  |
| H  | -1.363618000 | -1.513261000 | -9.960458000  |
| H  | -2.692328000 | -0.480024000 | -10.501834000 |
| H  | -2.793770000 | -1.311467000 | -8.937885000  |
| H  | -0.831802000 | 0.942418000  | -9.678350000  |
| C  | 2.115446000  | 0.789553000  | -9.624700000  |
| H  | 2.692301000  | 0.477243000  | -10.501963000 |
| H  | 2.793747000  | 1.309093000  | -8.938231000  |
| H  | 1.363592000  | 1.510618000  | -9.960851000  |
| H  | 0.831783000  | -0.944989000 | -9.678103000  |
| Pd | 6.133346000  | 0.686248000  | -0.027924000  |
| Pd | -6.133347000 | -0.686255000 | -0.027732000  |
| H  | -8.353318000 | -0.238773000 | -1.924978000  |

(S,S)<sub>2</sub>(R,R)<sub>2</sub>

Sum of electronic and thermal free energies: -5952.784253

|   |              |              |             |
|---|--------------|--------------|-------------|
| C | 1.128608000  | -4.727036000 | 4.745265000 |
| C | 2.275198000  | -5.548696000 | 4.654025000 |
| C | 3.507903000  | -5.093888000 | 4.185941000 |
| C | 3.607965000  | -3.711147000 | 3.883215000 |
| C | 2.478211000  | -2.884260000 | 4.023306000 |
| C | 1.230472000  | -3.348441000 | 4.454812000 |
| H | 2.597775000  | -1.813522000 | 3.869398000 |
| C | 4.642008000  | -6.084272000 | 4.022546000 |
| H | 5.139284000  | -6.307851000 | 4.975924000 |
| H | 5.406766000  | -5.736549000 | 3.322947000 |
| H | 4.262224000  | -7.037147000 | 3.641362000 |
| C | 0.119194000  | -2.361837000 | 4.715103000 |
| H | 0.517910000  | -1.344560000 | 4.792240000 |
| H | -0.397621000 | -2.596472000 | 5.651518000 |
| H | -0.644017000 | -2.364062000 | 3.928498000 |
| C | 0.039290000  | -5.509118000 | 5.366100000 |
| C | 0.744188000  | -6.637301000 | 6.135196000 |

|   |              |              |             |
|---|--------------|--------------|-------------|
| C | 1.969553000  | -6.917541000 | 5.219734000 |
| H | 1.698587000  | -7.626875000 | 4.424335000 |
| H | 2.810654000  | -7.352714000 | 5.768791000 |
| C | 1.192093000  | -6.227841000 | 7.551540000 |
| H | 0.107136000  | -7.521914000 | 6.207180000 |
| H | 1.871303000  | -5.368183000 | 7.520303000 |
| H | 1.715113000  | -7.057420000 | 8.039629000 |
| H | 0.338934000  | -5.955983000 | 8.181165000 |
| C | 4.901553000  | -3.072865000 | 3.537748000 |
| C | 4.993725000  | -2.111550000 | 2.518466000 |
| N | 6.139964000  | -1.470589000 | 2.214629000 |
| C | 7.268063000  | -1.766445000 | 2.891820000 |
| C | 6.086001000  | -3.349800000 | 4.246664000 |
| C | 7.273285000  | -2.705796000 | 3.914854000 |
| H | 8.169853000  | -1.236389000 | 2.607293000 |
| H | 6.068047000  | -4.054430000 | 5.070204000 |
| H | 4.123290000  | -1.853665000 | 1.925641000 |
| H | -4.312787000 | -5.527133000 | 6.808379000 |
| C | -1.316682000 | -5.410789000 | 5.307961000 |
| C | -2.230986000 | -6.115333000 | 6.322239000 |
| C | -3.370066000 | -5.070245000 | 6.490839000 |
| H | -0.577084000 | -5.687061000 | 2.455678000 |
| C | -2.229728000 | -4.652155000 | 4.427931000 |
| H | -1.236394000 | -4.701068000 | 1.137031000 |
| C | -3.447290000 | -4.445446000 | 5.115764000 |
| H | -3.096602000 | -4.325932000 | 7.252706000 |
| C | -0.953298000 | -4.692274000 | 2.194875000 |
| H | -6.400056000 | -4.450935000 | 5.526422000 |
| C | -2.135525000 | -4.324379000 | 3.057255000 |
| C | -4.557402000 | -3.828461000 | 4.538950000 |
| C | -5.775874000 | -3.556693000 | 5.396215000 |
| H | -0.111453000 | -4.000098000 | 2.311762000 |
| C | -4.458766000 | -3.486891000 | 3.165487000 |
| H | -5.472461000 | -3.242893000 | 6.399702000 |
| H | -6.410290000 | -2.766157000 | 4.986593000 |
| H | -7.065785000 | -4.381250000 | 3.172906000 |
| C | -5.618638000 | -2.977170000 | 2.393951000 |
| C | -6.901332000 | -3.547723000 | 2.499574000 |
| C | -5.474598000 | -1.933091000 | 1.466784000 |
| C | -7.952473000 | -3.068433000 | 1.724623000 |
| H | -4.517170000 | -1.439708000 | 1.340377000 |
| H | -8.945685000 | -3.498742000 | 1.797052000 |
| N | -6.488937000 | -1.486728000 | 0.699791000 |
| C | -7.714138000 | -2.036033000 | 0.826409000 |
| H | -8.500543000 | -1.642121000 | 0.192948000 |
| C | -2.784438000 | -7.461929000 | 5.817515000 |
| H | -1.981747000 | -8.180545000 | 5.623865000 |
| H | -3.350527000 | -7.334947000 | 4.887595000 |

|   |              |              |              |
|---|--------------|--------------|--------------|
| H | -3.452611000 | -7.902658000 | 6.565363000  |
| H | -1.714156000 | -6.278100000 | 7.270912000  |
| H | 8.193610000  | -2.912307000 | 4.450843000  |
| C | -1.128607000 | 4.727031000  | -4.745267000 |
| C | -0.039290000 | 5.509120000  | -5.366096000 |
| C | 1.316683000  | 5.410798000  | -5.307950000 |
| C | 2.230988000  | 6.115350000  | -6.322223000 |
| C | 3.370074000  | 5.070269000  | -6.490820000 |
| C | 3.447295000  | 4.445466000  | -5.115745000 |
| C | 4.557408000  | 3.828485000  | -4.538928000 |
| C | 5.618636000  | 2.977189000  | -2.393929000 |
| C | 5.474597000  | 1.933103000  | -1.466771000 |
| H | 4.517171000  | 1.439713000  | -1.340374000 |
| N | 6.488934000  | 1.486739000  | -0.699775000 |
| C | 7.714133000  | 2.036052000  | -0.826381000 |
| H | 8.500536000  | 1.642142000  | -0.192918000 |
| C | 7.952467000  | 3.068461000  | -1.724586000 |
| H | 8.945677000  | 3.498776000  | -1.797006000 |
| C | 6.901328000  | 3.547750000  | -2.499540000 |
| H | 7.065781000  | 4.381282000  | -3.172865000 |
| C | 2.135521000  | 4.324388000  | -3.057243000 |
| C | 5.775885000  | 3.556727000  | -5.396187000 |
| H | 5.472480000  | 3.242931000  | -6.399678000 |
| H | 6.400065000  | 4.450973000  | -5.526387000 |
| H | 6.410302000  | 2.766192000  | -4.986565000 |
| H | 4.312794000  | 5.527163000  | -6.808353000 |
| H | 3.096619000  | 4.325956000  | -7.252690000 |
| C | 2.229729000  | 4.652168000  | -4.427918000 |
| C | -0.744190000 | 6.637299000  | -6.135196000 |
| C | -1.969562000 | 6.917531000  | -5.219742000 |
| H | -1.698605000 | 7.626868000  | -4.424341000 |
| H | -2.810663000 | 7.352699000  | -5.768803000 |
| C | -1.230465000 | 3.348436000  | -4.454814000 |
| C | -2.478203000 | 2.884249000  | -4.023312000 |
| H | -2.597762000 | 1.813510000  | -3.869403000 |
| C | -3.607962000 | 3.711130000  | -3.883227000 |
| C | -4.901549000 | 3.072841000  | -3.537767000 |
| C | -6.085993000 | 3.349764000  | -4.246694000 |
| H | -6.068036000 | 4.054389000  | -5.070238000 |
| C | -7.273275000 | 2.705755000  | -3.914890000 |
| H | -8.193596000 | 2.912256000  | -4.450888000 |
| C | -7.268056000 | 1.766411000  | -2.891850000 |
| H | -8.169844000 | 1.236350000  | -2.607327000 |
| N | -6.139960000 | 1.470567000  | -2.214646000 |
| C | -4.993723000 | 2.111533000  | -2.518478000 |
| H | -4.123291000 | 1.853659000  | -1.925644000 |
| C | -3.507907000 | 5.093870000  | -4.185955000 |
| C | -4.642020000 | 6.084247000  | -4.022569000 |

|   |              |              |              |
|---|--------------|--------------|--------------|
| H | -5.139290000 | 6.307823000  | -4.975951000 |
| H | -5.406781000 | 5.736519000  | -3.322976000 |
| H | -4.262244000 | 7.037125000  | -3.641382000 |
| C | -2.275202000 | 5.548685000  | -4.654034000 |
| C | -1.192084000 | 6.227836000  | -7.551543000 |
| H | -1.871289000 | 5.368175000  | -7.520310000 |
| H | -0.338919000 | 5.955983000  | -8.181162000 |
| H | -1.715106000 | 7.057412000  | -8.039635000 |
| H | -0.107143000 | 7.521916000  | -6.207176000 |
| C | 2.784429000  | 7.461947000  | -5.817493000 |
| H | 1.714161000  | 6.278115000  | -7.270898000 |
| H | 3.350514000  | 7.334967000  | -4.887571000 |
| H | 1.981733000  | 8.180558000  | -5.623846000 |
| H | 3.452602000  | 7.902683000  | -6.565338000 |
| C | -0.119180000 | 2.361837000  | -4.715099000 |
| H | 0.397639000  | 2.596477000  | -5.651510000 |
| H | -0.517892000 | 1.344559000  | -4.792242000 |
| H | 0.644025000  | 2.364064000  | -3.928489000 |
| C | 0.953289000  | 4.692275000  | -2.194867000 |
| H | 1.236382000  | 4.701071000  | -1.137022000 |
| H | 0.111449000  | 4.000095000  | -2.311756000 |
| H | 0.577070000  | 5.687060000  | -2.455671000 |
| H | -3.350554000 | 7.334938000  | 4.887589000  |
| H | -1.236413000 | 4.701062000  | 1.137032000  |
| H | 3.096623000  | -4.325902000 | -7.252718000 |
| H | 5.472474000  | -3.242852000 | -6.399717000 |
| H | 6.400081000  | -4.450886000 | -5.526439000 |
| H | -1.981777000 | 8.180535000  | 5.623864000  |
| C | -2.784469000 | 7.461920000  | 5.817511000  |
| H | -0.338901000 | -5.955968000 | -8.181177000 |
| H | -3.452644000 | 7.902650000  | 6.565357000  |
| C | 5.775892000  | -3.556649000 | -5.396230000 |
| H | -0.517893000 | -1.344553000 | -4.792242000 |
| H | -8.945703000 | 3.498710000  | 1.797032000  |
| C | -7.952489000 | 3.068404000  | 1.724606000  |
| H | -1.871272000 | -5.368175000 | -7.520314000 |
| C | -1.192059000 | -6.227830000 | -7.551553000 |
| C | -6.901351000 | 3.547700000  | 2.499559000  |
| H | -7.065810000 | 4.381228000  | 3.172887000  |
| C | -0.953319000 | 4.692268000  | 2.194877000  |
| C | 3.370092000  | -5.070215000 | -6.490853000 |
| C | -7.714148000 | 2.036001000  | 0.826397000  |
| H | -1.715076000 | -7.057410000 | -8.039644000 |
| H | -3.237664000 | 3.552399000  | 1.397074000  |
| H | 0.397643000  | -2.596460000 | -5.651520000 |
| C | -3.263136000 | 3.740986000  | 2.468572000  |
| H | -8.500551000 | 1.642085000  | 0.192935000  |
| H | 4.312815000  | -5.527097000 | -6.808394000 |

|   |              |              |              |
|---|--------------|--------------|--------------|
| C | -5.618655000 | 2.977151000  | 2.393941000  |
| C | -0.119174000 | -2.361828000 | -4.715105000 |
| H | -0.577107000 | 5.687055000  | 2.455682000  |
| C | -2.135547000 | 4.324370000  | 3.057253000  |
| C | -4.458787000 | 3.486877000  | 3.165480000  |
| N | -6.488945000 | 1.486700000  | 0.699785000  |
| H | -6.400089000 | 4.450922000  | 5.526403000  |
| H | 1.714188000  | -6.278078000 | -7.270926000 |
| H | 6.410302000  | -2.766108000 | -4.986609000 |
| C | -5.474610000 | 1.933069000  | 1.466779000  |
| H | 1.698567000  | 7.626863000  | 4.424357000  |
| C | 4.557424000  | -3.828427000 | -4.538963000 |
| C | 3.447315000  | -4.445418000 | -5.115776000 |
| C | -7.273264000 | -2.705807000 | -3.914877000 |
| C | -2.229755000 | 4.652146000  | 4.427929000  |
| C | -4.557429000 | 3.828449000  | 4.538941000  |
| C | -7.268048000 | -1.766461000 | -2.891838000 |
| C | 2.231019000  | -6.115310000 | -6.322253000 |
| H | -8.193585000 | -2.912317000 | -4.450871000 |
| H | -0.111473000 | 4.000094000  | 2.311765000  |
| H | -8.169840000 | -1.236407000 | -2.607314000 |
| C | -2.231020000 | 6.115324000  | 6.322238000  |
| C | -3.447320000 | 4.445436000  | 5.115758000  |
| C | -6.085977000 | -3.349808000 | -4.246683000 |
| H | 0.644035000  | -2.364052000 | -3.928499000 |
| H | -4.312823000 | 5.527124000  | 6.808369000  |
| C | -5.775903000 | 3.556681000  | 5.396202000  |
| H | 4.262211000  | 7.037130000  | 3.641399000  |
| N | -6.139953000 | -1.470606000 | -2.214640000 |
| C | -1.316712000 | 5.410780000  | 5.307963000  |
| H | -4.517180000 | 1.439688000  | 1.340376000  |
| C | -1.230449000 | -3.348436000 | -4.454818000 |
| C | 6.901356000  | -3.547672000 | -2.499594000 |
| C | 7.952495000  | -3.068375000 | -1.724645000 |
| C | -0.744153000 | -6.637291000 | -6.135209000 |
| C | 1.316712000  | -5.410773000 | -5.307972000 |
| H | -6.068017000 | -4.054434000 | -5.070226000 |
| H | 7.065816000  | -4.381195000 | -3.172929000 |
| C | -4.901533000 | -3.072874000 | -3.537760000 |
| C | -0.039260000 | -5.509108000 | -5.366111000 |
| H | 8.945712000  | -3.498674000 | -1.797079000 |
| C | -3.370100000 | 5.070236000  | 6.490834000  |
| C | -4.993712000 | -2.111564000 | -2.518474000 |
| H | 0.107105000  | 7.521902000  | 6.207192000  |
| C | 1.969526000  | 6.917526000  | 5.219757000  |
| C | 4.458788000  | -3.486861000 | -3.165499000 |
| C | 5.618657000  | -2.977132000 | -2.393965000 |
| C | 7.714154000  | -2.035980000 | -0.826426000 |



|   |              |              |              |
|---|--------------|--------------|--------------|
| C | 2.229755000  | -4.652137000 | -4.427942000 |
| C | -1.128581000 | -4.727031000 | -4.745274000 |
| C | 0.039260000  | 5.509107000  | 5.366108000  |
| C | 5.474610000  | -1.933059000 | -1.466793000 |
| C | 0.744155000  | 6.637287000  | 6.135210000  |
| H | -1.714193000 | 6.278091000  | 7.270913000  |
| N | 6.488947000  | -1.486688000 | -0.699802000 |
| H | 8.500557000  | -1.642063000 | -0.192967000 |
| H | -0.107099000 | -7.521902000 | -6.207195000 |
| H | -5.472494000 | 3.242886000  | 6.399692000  |
| H | -4.123280000 | -1.853680000 | -1.925644000 |
| C | 4.641989000  | 6.084253000  | 4.022586000  |
| C | 2.275172000  | 5.548682000  | 4.654047000  |
| H | 3.452652000  | -7.902628000 | -6.565382000 |
| C | 2.784478000  | -7.461903000 | -5.817532000 |
| H | 2.810625000  | 7.352697000  | 5.768819000  |
| H | -6.410315000 | 2.766142000  | 4.986580000  |
| C | -2.275168000 | -5.548695000 | -4.654038000 |
| C | 1.128580000  | 4.727024000  | 4.745277000  |
| C | 3.507879000  | 5.093873000  | 4.185968000  |
| H | 4.517178000  | -1.439685000 | -1.340381000 |
| C | -3.607942000 | -3.711151000 | -3.883224000 |
| C | 3.263141000  | -3.740978000 | -2.468587000 |
| C | -1.969518000 | -6.917537000 | -5.219749000 |
| C | 2.135552000  | -4.324365000 | -3.057265000 |
| H | -2.810618000 | -7.352712000 | -5.768807000 |
| H | 5.406753000  | 5.736529000  | 3.322995000  |
| C | -3.507875000 | -5.093891000 | -4.185953000 |
| C | 3.607939000  | 3.711133000  | 3.883238000  |
| H | -3.096640000 | 4.325924000  | 7.252702000  |
| C | 1.230443000  | 3.348430000  | 4.454821000  |
| H | 5.139256000  | 6.307830000  | 4.975969000  |
| H | -5.139251000 | -6.307858000 | -4.975943000 |
| H | 1.981792000  | -8.180524000 | -5.623882000 |
| H | 3.350568000  | -7.334920000 | -4.887613000 |
| H | -0.644043000 | 2.364052000  | 3.928494000  |
| H | 6.068008000  | 4.054394000  | 5.070259000  |
| C | 1.192050000  | 6.227825000  | 7.551557000  |
| C | 0.119162000  | 2.361826000  | 4.715104000  |
| H | 3.237673000  | -3.552395000 | -1.397088000 |
| C | -4.641978000 | -6.084278000 | -4.022564000 |
| H | -0.397659000 | 2.596462000  | 5.651516000  |
| C | 6.085969000  | 3.349772000  | 4.246712000  |
| C | 0.953329000  | -4.692270000 | -2.194884000 |
| H | 0.111480000  | -4.000099000 | -2.311766000 |
| H | 1.715069000  | 7.057402000  | 8.039650000  |
| C | 4.901529000  | 3.072850000  | 3.537779000  |
| H | -1.698551000 | -7.626872000 | -4.424351000 |

|    |              |              |              |
|----|--------------|--------------|--------------|
| H  | 0.338887000  | 5.955967000  | 8.181175000  |
| H  | 0.577121000  | -5.687058000 | -2.455689000 |
| H  | -5.406739000 | -5.736558000 | -3.322966000 |
| C  | 7.273254000  | 2.705766000  | 3.914910000  |
| H  | 8.193573000  | 2.912266000  | 4.450913000  |
| H  | 1.871258000  | 5.368166000  | 7.520322000  |
| C  | 4.993709000  | 2.111547000  | 2.518486000  |
| H  | -4.262192000 | -7.037153000 | -3.641379000 |
| C  | 7.268041000  | 1.766427000  | 2.891866000  |
| H  | 0.517877000  | 1.344550000  | 4.792245000  |
| H  | 1.236428000  | -4.701065000 | -1.137040000 |
| N  | 6.139949000  | 1.470584000  | 2.214656000  |
| H  | 4.123280000  | 1.853674000  | 1.925647000  |
| H  | 8.169831000  | 1.236368000  | 2.607345000  |
| Pd | -6.248387000 | -0.000017000 | -0.737052000 |
| Pd | 6.248386000  | 0.000011000  | 0.737051000  |
| C  | -2.478190000 | -2.884261000 | -4.023311000 |
| H  | -2.597758000 | -1.813524000 | -3.869401000 |
| C  | 2.478183000  | 2.884248000  | 4.023319000  |
| H  | 2.597746000  | 1.813510000  | 3.869408000  |
| C  | 4.458766000  | 3.486910000  | -3.165468000 |
| C  | 3.263112000  | 3.741009000  | -2.468562000 |
| H  | 3.237640000  | 3.552419000  | -1.397064000 |
| C  | -3.263116000 | -3.740998000 | 2.468577000  |
| H  | -3.237648000 | -3.552412000 | 1.397078000  |

(S,S)(R,R)(S,S)(R,R)

Sum of electronic and thermal free energies: -5952.78232

|   |              |              |             |
|---|--------------|--------------|-------------|
| C | -1.685040000 | -3.237044000 | 5.739404000 |
| C | -2.810639000 | -2.809066000 | 6.479404000 |
| C | -3.978942000 | -2.329333000 | 5.887304000 |
| C | -4.045567000 | -2.376141000 | 4.470469000 |
| C | -2.942749000 | -2.852173000 | 3.737610000 |
| C | -1.754350000 | -3.293876000 | 4.329815000 |
| H | -3.045330000 | -2.961465000 | 2.659668000 |
| C | -5.081404000 | -1.788123000 | 6.773578000 |
| H | -5.693703000 | -2.587929000 | 7.211322000 |
| H | -5.753372000 | -1.109133000 | 6.241910000 |
| H | -4.654426000 | -1.231353000 | 7.613311000 |
| C | -0.683484000 | -3.920425000 | 3.471603000 |
| H | -1.090607000 | -4.206078000 | 2.495700000 |
| H | -0.279714000 | -4.819796000 | 3.948158000 |
| H | 0.166744000  | -3.251100000 | 3.297165000 |
| C | -0.676126000 | -3.763302000 | 6.681961000 |
| C | -1.465330000 | -4.136705000 | 7.946334000 |
| C | -2.571809000 | -3.043868000 | 7.954305000 |
| H | -2.205907000 | -2.132833000 | 8.449656000 |
| H | -3.471587000 | -3.364142000 | 8.489207000 |

|   |              |              |             |
|---|--------------|--------------|-------------|
| C | -2.080446000 | -5.548416000 | 7.891692000 |
| H | -0.839395000 | -4.057404000 | 8.838262000 |
| H | -2.752869000 | -5.655679000 | 7.032830000 |
| H | -2.656356000 | -5.747701000 | 8.801958000 |
| H | -1.309360000 | -6.321063000 | 7.810077000 |
| C | -5.287956000 | -2.049675000 | 3.728881000 |
| C | -5.253003000 | -1.312557000 | 2.534274000 |
| N | -6.353731000 | -1.042547000 | 1.804841000 |
| C | -7.559195000 | -1.468143000 | 2.234359000 |
| C | -6.552955000 | -2.506703000 | 4.145105000 |
| C | -7.690981000 | -2.203903000 | 3.404963000 |
| H | -8.419319000 | -1.215403000 | 1.625146000 |
| H | -6.638461000 | -3.115855000 | 5.037581000 |
| H | -4.313891000 | -0.924235000 | 2.156000000 |
| H | 3.472442000  | -5.652565000 | 7.171281000 |
| C | 0.676811000  | -3.889421000 | 6.609259000 |
| C | 1.466146000  | -4.795332000 | 7.566954000 |
| C | 2.572616000  | -5.350831000 | 6.625785000 |
| H | 0.280035000  | -0.994791000 | 6.150186000 |
| C | 1.685613000  | -3.338441000 | 5.680810000 |
| H | 1.090742000  | -0.046803000 | 4.890065000 |
| C | 2.811299000  | -4.193179000 | 5.682185000 |
| H | 2.206748000  | -6.236655000 | 6.086619000 |
| C | 0.683758000  | -1.034239000 | 5.133106000 |
| H | 5.694293000  | -4.936966000 | 5.858505000 |
| C | 1.754745000  | -2.090893000 | 5.022161000 |
| C | 3.979550000  | -3.921868000 | 4.969983000 |
| C | 5.082143000  | -4.959924000 | 4.946932000 |
| H | -0.166480000 | -1.219600000 | 4.466738000 |
| C | 4.046003000  | -2.673073000 | 4.299054000 |
| H | 4.655301000  | -5.965735000 | 4.886846000 |
| H | 5.754232000  | -4.840850000 | 4.092910000 |
| H | 6.638841000  | -2.791596000 | 5.223641000 |
| C | 5.288334000  | -2.195460000 | 3.644393000 |
| C | 6.553316000  | -2.325648000 | 4.248720000 |
| C | 5.253318000  | -1.532528000 | 2.407082000 |
| C | 7.691269000  | -1.837325000 | 3.615323000 |
| H | 4.314218000  | -1.400633000 | 1.881239000 |
| H | 8.672326000  | -1.936034000 | 4.067745000 |
| N | 6.353979000  | -1.037010000 | 1.807412000 |
| C | 7.559419000  | -1.194425000 | 2.391257000 |
| H | 8.419484000  | -0.794188000 | 1.866920000 |
| C | 2.081265000  | -4.039237000 | 8.760362000 |
| H | 1.310178000  | -3.580720000 | 9.387582000 |
| H | 2.753663000  | -3.242617000 | 8.421873000 |
| H | 2.657201000  | -4.726365000 | 9.389746000 |
| H | 0.840290000  | -5.606550000 | 7.946224000 |
| H | -8.672049000 | -2.545398000 | 3.717674000 |

|   |              |             |             |
|---|--------------|-------------|-------------|
| C | 1.684974000  | 5.739472000 | 3.236835000 |
| C | 0.676042000  | 6.682061000 | 3.763004000 |
| C | -0.676897000 | 6.609364000 | 3.889099000 |
| C | -1.466253000 | 7.567131000 | 4.794917000 |
| C | -2.572732000 | 6.626009000 | 5.350473000 |
| C | -2.811386000 | 5.682303000 | 4.192901000 |
| C | -3.979626000 | 4.970068000 | 3.921631000 |
| C | -5.288360000 | 3.644285000 | 2.195333000 |
| C | -5.253329000 | 2.406854000 | 1.532630000 |
| H | -4.314231000 | 1.880959000 | 1.400919000 |
| N | -6.353966000 | 1.807123000 | 1.037129000 |
| C | -7.559398000 | 2.391054000 | 1.194325000 |
| H | -8.419445000 | 1.866687000 | 0.794091000 |
| C | -7.691265000 | 3.615226000 | 1.837010000 |
| H | -8.672316000 | 4.067695000 | 1.935558000 |
| C | -6.553332000 | 4.248669000 | 2.325331000 |
| H | -6.638866000 | 5.223664000 | 2.791124000 |
| C | -1.754795000 | 5.022106000 | 2.090688000 |
| C | -5.082256000 | 4.947115000 | 4.959652000 |
| H | -4.655451000 | 4.887150000 | 5.965485000 |
| H | -5.694424000 | 5.858672000 | 4.936568000 |
| H | -5.754325000 | 4.093067000 | 4.840645000 |
| H | -3.472567000 | 7.171530000 | 5.652135000 |
| H | -2.206886000 | 6.086924000 | 6.236356000 |
| C | -1.685685000 | 5.680863000 | 3.338181000 |
| C | 1.465231000  | 7.946464000 | 4.136338000 |
| C | 2.571742000  | 7.954363000 | 3.043534000 |
| H | 2.205866000  | 8.449655000 | 2.132455000 |
| H | 3.471509000  | 8.489288000 | 3.363800000 |
| C | 1.754287000  | 4.329888000 | 3.293762000 |
| C | 2.942686000  | 3.737656000 | 2.852095000 |
| H | 3.045267000  | 2.659721000 | 2.961449000 |
| C | 4.045509000  | 4.470486000 | 2.376034000 |
| C | 5.287900000  | 3.728876000 | 2.049621000 |
| C | 6.552876000  | 4.145067000 | 2.506732000 |
| H | 6.638355000  | 5.037530000 | 3.115909000 |
| C | 7.690905000  | 3.404893000 | 2.204020000 |
| H | 8.671951000  | 3.717561000 | 2.545615000 |
| C | 7.559136000  | 2.234307000 | 1.468222000 |
| H | 8.419261000  | 1.625060000 | 1.215570000 |
| N | 6.353701000  | 1.804840000 | 1.042516000 |
| C | 5.252968000  | 2.534285000 | 1.312470000 |
| H | 4.313860000  | 2.156013000 | 0.924136000 |
| C | 3.978894000  | 5.887320000 | 2.329157000 |
| C | 5.081379000  | 6.773560000 | 1.787942000 |
| H | 5.693640000  | 7.211344000 | 2.587755000 |
| H | 5.753381000  | 6.241851000 | 1.109017000 |
| H | 4.654431000  | 7.613262000 | 1.231104000 |

|   |              |              |              |
|---|--------------|--------------|--------------|
| C | 2.810580000  | 6.479447000  | 2.808830000  |
| C | 2.080306000  | 7.891923000  | 5.548071000  |
| H | 2.752728000  | 7.033071000  | 5.655413000  |
| H | 1.309199000  | 7.810359000  | 6.320702000  |
| H | 2.656208000  | 8.802204000  | 5.747309000  |
| H | 0.839296000  | 8.838385000  | 4.056957000  |
| C | -2.081361000 | 8.760473000  | 4.038707000  |
| H | -0.840414000 | 7.946472000  | 5.606115000  |
| H | -2.753745000 | 8.421911000  | 3.242106000  |
| H | -1.310268000 | 9.387653000  | 3.580146000  |
| H | -2.657310000 | 9.389916000  | 4.725769000  |
| C | 0.683428000  | 3.471716000  | 3.920379000  |
| H | 0.279678000  | 3.948325000  | 4.819730000  |
| H | 1.090554000  | 2.495828000  | 4.206082000  |
| H | -0.166814000 | 3.297242000  | 3.251083000  |
| C | -0.683810000 | 5.132991000  | 1.034027000  |
| H | -1.090786000 | 4.889850000  | 0.046614000  |
| H | 0.166450000  | 4.466668000  | 1.219446000  |
| H | -0.280121000 | 6.150081000  | 0.994490000  |
| H | 2.753620000  | -7.032189000 | -5.656047000 |
| H | 1.090780000  | -2.495415000 | -4.205936000 |
| H | -2.206553000 | 2.132533000  | -8.449499000 |
| H | -4.654919000 | 1.230720000  | -7.613129000 |
| H | -5.694379000 | 2.587139000  | -7.211087000 |
| H | 1.310158000  | -7.809642000 | -6.321290000 |
| C | 2.081355000  | -7.891169000 | -5.548745000 |
| H | 1.309445000  | 3.580888000  | -9.387413000 |
| H | 2.657393000  | -8.801328000 | -5.748152000 |
| C | -5.081960000 | 1.787408000  | -6.773374000 |
| H | 1.090540000  | 0.046796000  | -4.890050000 |
| H | 8.672573000  | -3.716069000 | -2.545922000 |
| C | 7.691473000  | -3.403612000 | -2.204289000 |
| H | 2.752965000  | 3.242989000  | -8.421686000 |
| C | 2.080450000  | 4.039512000  | -8.760171000 |
| C | 6.553565000  | -4.143912000 | -2.507143000 |
| H | 6.639189000  | -5.036251000 | -3.116480000 |
| C | 0.683861000  | -3.471416000 | -3.920327000 |
| C | -2.572552000 | 3.043517000  | -7.954123000 |
| C | 7.559524000  | -2.233184000 | -1.468274000 |
| H | 2.656291000  | 4.726741000  | -9.389532000 |
| H | 3.045647000  | -2.659124000 | -2.961480000 |
| H | 0.279693000  | 0.994687000  | -6.150151000 |
| C | 2.943264000  | -3.737093000 | -2.852271000 |
| H | 8.419555000  | -1.623870000 | -1.215472000 |
| H | -3.472377000 | 3.363697000  | -8.489003000 |
| C | 5.288525000  | -3.728021000 | -2.049932000 |
| C | 0.683389000  | 1.034169000  | -5.133061000 |
| H | 0.280113000  | -3.947978000 | -4.819705000 |

|   |              |              |              |
|---|--------------|--------------|--------------|
| C | 1.754933000  | -4.329476000 | -3.293924000 |
| C | 4.046253000  | -4.469801000 | -2.376399000 |
| N | 6.354011000  | -1.803981000 | -1.042496000 |
| H | 5.694859000  | -7.210338000 | -2.588621000 |
| H | -0.840268000 | 4.057266000  | -8.838090000 |
| H | -5.753822000 | 1.108308000  | -6.241712000 |
| C | 5.253399000  | -2.533565000 | -1.312573000 |
| H | -2.206041000 | -6.086798000 | -6.236542000 |
| C | -3.979559000 | 2.328753000  | -5.887109000 |
| C | -2.811333000 | 2.808655000  | -6.479222000 |
| C | 7.690745000  | 1.838193000  | -3.615353000 |
| C | 1.685872000  | -5.739078000 | -3.237186000 |
| C | 3.979890000  | -5.886654000 | -2.329720000 |
| C | 7.559029000  | 1.195287000  | -2.391276000 |
| C | -1.466198000 | 4.136482000  | -7.946151000 |
| H | 8.671762000  | 1.937009000  | -4.067836000 |
| H | -0.166351000 | -3.297188000 | -3.250928000 |
| H | 8.419173000  | 0.795158000  | -1.866989000 |
| C | 1.466425000  | -7.945991000 | -4.136962000 |
| C | 2.811643000  | -6.478917000 | -2.809384000 |
| C | 6.552698000  | 2.326386000  | -4.248686000 |
| H | -0.166895000 | 1.219355000  | -4.466704000 |
| H | 3.472870000  | -8.488567000 | -3.364681000 |
| C | 5.082569000  | -6.772775000 | -1.788708000 |
| H | -4.654794000 | -4.887447000 | -5.965467000 |
| N | 6.353642000  | 1.037743000  | -1.807354000 |
| C | 0.677057000  | -6.681767000 | -3.763397000 |
| H | 4.314252000  | -2.155563000 | -0.924075000 |
| C | 1.754193000  | 2.091002000  | -5.022058000 |
| C | -6.553569000 | 2.505682000  | -4.144822000 |
| C | -7.691517000 | 2.202684000  | -3.404639000 |
| C | 1.465199000  | 4.795487000  | -7.566753000 |
| C | -0.676934000 | 3.763149000  | -6.681793000 |
| H | 6.638113000  | 2.792346000  | -5.223612000 |
| H | -6.639209000 | 3.114837000  | -5.037282000 |
| C | 5.287768000  | 2.196052000  | -3.644291000 |
| C | 0.675987000  | 3.889435000  | -6.609093000 |
| H | -8.672654000 | 2.544016000  | -3.717308000 |
| C | 2.573039000  | -7.953842000 | -3.044262000 |
| C | 5.252894000  | 1.533131000  | -2.406969000 |
| H | -0.839288000 | -7.946225000 | -5.606545000 |
| C | -2.571783000 | -6.626035000 | -5.350709000 |
| C | -4.046162000 | 2.375528000  | -4.470269000 |
| C | -5.288479000 | 2.048860000  | -3.728649000 |
| C | -7.559565000 | 1.466936000  | -2.234046000 |
| C | -1.685774000 | 3.236758000  | -5.739234000 |
| C | 1.684866000  | 3.338567000  | -5.680659000 |
| C | -0.675902000 | -6.609266000 | -3.889401000 |

|   |              |              |              |
|---|--------------|--------------|--------------|
| C | -5.253361000 | 1.311740000  | -2.534046000 |
| C | -1.465152000 | -7.567054000 | -4.795287000 |
| H | 0.840650000  | -8.838028000 | -4.057634000 |
| N | -6.354016000 | 1.041538000  | -1.804573000 |
| H | -8.419629000 | 1.214050000  | -1.624807000 |
| H | 0.839227000  | 5.606622000  | -7.946011000 |
| H | 4.655806000  | -7.612636000 | -1.231967000 |
| H | 4.313829000  | 1.401122000  | -1.881090000 |
| C | -5.081551000 | -4.947585000 | -4.959624000 |
| C | -2.810537000 | -5.682492000 | -4.193027000 |
| H | -2.657416000 | 5.747359000  | -8.801729000 |
| C | -2.081468000 | 5.548123000  | -7.891477000 |
| H | -3.471547000 | -7.171654000 | -5.652406000 |
| H | 5.754515000  | -6.241047000 | -1.109743000 |
| C | 2.810423000  | 4.193476000  | -5.681994000 |
| C | -1.684810000 | -5.680978000 | -3.338339000 |
| C | -3.978878000 | -4.970464000 | -3.921646000 |
| H | -4.314171000 | 0.923568000  | -2.155812000 |
| C | 4.045356000  | 2.673505000  | -4.298917000 |
| C | -2.943397000 | 2.851707000  | -3.737424000 |
| C | 2.571576000  | 5.351124000  | -6.625557000 |
| C | -1.755069000 | 3.293575000  | -4.329647000 |
| H | 3.471360000  | 5.653011000  | -7.171036000 |
| H | -5.753756000 | -4.093660000 | -4.840503000 |
| C | 3.978716000  | 3.922311000  | -4.969804000 |
| C | -4.045358000 | -4.299538000 | -2.672854000 |
| H | 2.207333000  | -8.449316000 | -2.133214000 |
| C | -1.753985000 | -5.022358000 | -2.090775000 |
| H | -5.693570000 | -5.859243000 | -4.936608000 |
| H | 5.693308000  | 4.937686000  | -5.858304000 |
| H | -1.310462000 | 6.320850000  | -7.809867000 |
| H | -2.753885000 | 5.655303000  | -7.032601000 |
| H | 0.167188000  | -4.466721000 | -1.219494000 |
| H | -6.638014000 | -5.224639000 | -2.791013000 |
| C | -2.080070000 | -8.760556000 | -4.039175000 |
| C | -0.682966000 | -5.133198000 | -1.034142000 |
| H | -3.045976000 | 2.960984000  | -2.659481000 |
| C | 5.081167000  | 4.960521000  | -4.946723000 |
| H | -0.279118000 | -6.150229000 | -0.994725000 |
| C | -6.552635000 | -4.249651000 | -2.325177000 |
| C | -0.684267000 | 3.920267000  | -3.471460000 |
| H | 0.166070000  | 3.251069000  | -3.297069000 |
| H | -2.655951000 | -9.390013000 | -4.726282000 |
| C | -5.287764000 | -3.645054000 | -2.195193000 |
| H | 2.205571000  | 6.236876000  | -6.086366000 |
| H | -1.308879000 | -9.387675000 | -3.580696000 |
| H | -0.280653000 | 4.819710000  | -3.948011000 |
| H | 5.753285000  | 4.841497000  | -4.092717000 |

|    |              |              |              |
|----|--------------|--------------|--------------|
| C  | -7.690663000 | -3.616429000 | -1.836793000 |
| H  | -8.671637000 | -4.069066000 | -1.935326000 |
| H  | -2.752479000 | -8.422165000 | -3.242522000 |
| C  | -5.252923000 | -2.407649000 | -1.532434000 |
| H  | 4.654188000  | 5.966270000  | -4.886586000 |
| C  | -7.558987000 | -2.392258000 | -1.194063000 |
| H  | -1.089966000 | -4.890234000 | -0.046693000 |
| H  | -1.091399000 | 4.205836000  | -2.495537000 |
| N  | -6.353651000 | -1.808128000 | -1.036880000 |
| H  | -4.313910000 | -1.881606000 | -1.400711000 |
| H  | -8.419111000 | -1.868052000 | -0.793783000 |
| Pd | 6.284063000  | 0.000383000  | 0.000055000  |
| Pd | -6.284069000 | -0.000499000 | 0.000131000  |
| C  | 2.942569000  | 1.800675000  | -4.342665000 |
| H  | 3.045165000  | 0.813598000  | -3.895920000 |
| C  | -2.942395000 | -4.343110000 | -1.800239000 |
| H  | -3.044858000 | -3.896356000 | -0.813153000 |
| C  | -4.046044000 | 4.299008000  | 2.672906000  |
| C  | -2.943114000 | 4.342656000  | 1.800253000  |
| H  | -3.045538000 | 3.895789000  | 0.813213000  |
| C  | 2.943083000  | -1.800407000 | 4.342767000  |
| H  | 3.045530000  | -0.813324000 | 3.896004000  |

### **Pd<sub>2</sub>(stable E-1)<sub>4</sub>**

(S,S)<sub>4</sub>

Sum of electronic and thermal free energies: -5952.759457

|   |              |             |              |
|---|--------------|-------------|--------------|
| C | -3.650872000 | 2.602609000 | -3.600718000 |
| C | -3.939247000 | 3.067049000 | -2.316882000 |
| C | -3.679280000 | 4.392543000 | -1.899181000 |
| C | -3.268554000 | 5.352548000 | -2.843079000 |
| C | -2.974192000 | 4.885740000 | -4.131670000 |
| C | -3.105038000 | 3.540563000 | -4.513022000 |
| H | -2.617890000 | 5.604260000 | -4.866651000 |
| C | -3.987160000 | 1.173177000 | -3.970594000 |
| H | -4.979470000 | 0.902861000 | -3.594954000 |
| H | -3.284922000 | 0.451154000 | -3.530314000 |
| H | -4.000142000 | 1.011979000 | -5.051324000 |
| C | -3.210693000 | 6.836392000 | -2.566140000 |
| H | -3.541730000 | 7.400016000 | -3.444350000 |
| H | -2.199087000 | 7.183204000 | -2.325306000 |
| H | -3.861258000 | 7.105875000 | -1.730715000 |
| C | -4.564001000 | 2.280587000 | -1.184415000 |
| C | -3.971606000 | 4.466921000 | -0.437367000 |
| C | -2.652875000 | 3.154339000 | -5.874722000 |
| C | -3.008929000 | 3.863774000 | -7.034989000 |



|   |              |             |              |
|---|--------------|-------------|--------------|
| C | -2.506904000 | 3.472903000 | -8.275241000 |
| C | -1.654666000 | 2.376167000 | -8.353288000 |
| N | -1.301764000 | 1.689099000 | -7.247545000 |
| C | -1.783420000 | 2.069319000 | -6.048978000 |
| H | -1.453885000 | 1.493115000 | -5.192315000 |
| H | -3.688139000 | 4.707824000 | -6.963423000 |
| H | -2.777086000 | 4.004544000 | -9.181547000 |
| H | -1.244816000 | 2.037655000 | -9.298185000 |
| C | -3.196582000 | 5.042843000 | 0.518849000  |
| C | -1.869222000 | 5.760272000 | 0.272205000  |
| C | -0.925559000 | 5.002029000 | 1.246772000  |
| C | -1.844322000 | 4.605685000 | 2.382599000  |
| H | -0.083066000 | 5.622260000 | 1.573730000  |
| H | -0.499817000 | 4.111354000 | 0.760309000  |
| C | -3.193545000 | 4.725358000 | 1.977302000  |
| C | -1.910062000 | 7.258068000 | 0.635205000  |
| H | -1.540332000 | 5.637319000 | -0.762507000 |
| H | -2.149415000 | 7.395673000 | 1.695383000  |
| H | -2.659176000 | 7.801933000 | 0.055247000  |
| H | -0.935130000 | 7.723173000 | 0.449068000  |
| C | -4.221723000 | 4.584573000 | 2.928240000  |
| C | -3.843440000 | 4.158999000 | 4.209181000  |
| C | -2.511159000 | 3.910219000 | 4.576866000  |
| C | -1.466702000 | 4.186593000 | 3.658869000  |
| H | -4.626219000 | 4.006317000 | 4.949022000  |
| C | -5.666333000 | 4.940579000 | 2.667090000  |
| H | -5.753061000 | 5.649367000 | 1.840112000  |
| H | -6.109727000 | 5.404310000 | 3.554143000  |
| H | -6.280341000 | 4.066293000 | 2.421643000  |
| C | -5.024883000 | 3.385847000 | -0.193858000 |
| H | -3.821110000 | 1.620715000 | -0.711248000 |
| H | -5.395002000 | 1.645119000 | -1.511526000 |
| C | -6.456405000 | 3.841574000 | -0.540104000 |
| H | -4.988772000 | 3.024511000 | 0.836699000  |
| H | -7.170551000 | 3.030456000 | -0.356950000 |
| H | -6.531470000 | 4.121165000 | -1.596698000 |
| H | -6.768047000 | 4.705102000 | 0.051939000  |
| C | 0.003066000  | 4.112226000 | 4.015829000  |
| H | 0.170526000  | 4.068506000 | 5.094798000  |
| H | 0.533138000  | 4.995794000 | 3.645439000  |
| H | 0.500073000  | 3.243188000 | 3.561895000  |
| C | -2.253204000 | 3.354374000 | 5.930506000  |
| C | -1.448192000 | 2.217958000 | 6.085767000  |
| N | -1.205482000 | 1.637197000 | 7.276116000  |
| C | -1.759669000 | 2.153539000 | 8.392152000  |
| C | -2.579890000 | 3.275580000 | 8.333079000  |
| C | -2.827578000 | 3.879307000 | 7.101333000  |
| H | -3.452495000 | 4.765378000 | 7.044565000  |

|   |              |              |              |
|---|--------------|--------------|--------------|
| H | -0.992090000 | 1.751883000  | 5.220193000  |
| H | -1.539358000 | 1.656054000  | 9.329899000  |
| H | -3.009093000 | 3.671786000  | 9.247320000  |
| H | 3.010432000  | -3.828735000 | 9.183005000  |
| C | 2.581097000  | -3.417017000 | 8.275708000  |
| H | 1.540711000  | -1.814705000 | 9.300118000  |
| H | 3.453514000  | -4.884651000 | 6.961880000  |
| C | 1.760885000  | -2.296147000 | 8.354001000  |
| C | 2.828605000  | -3.999676000 | 7.033822000  |
| H | -0.169788000 | -4.154676000 | 5.024790000  |
| C | -0.002487000 | -4.180026000 | 3.945209000  |
| H | -0.499563000 | -3.303390000 | 3.506205000  |
| N | 1.206534000  | -1.760872000 | 7.247002000  |
| H | -0.532607000 | -5.057165000 | 3.559912000  |
| C | 2.254061000  | -3.454880000 | 5.872189000  |
| C | 1.449072000  | -2.321276000 | 6.046899000  |
| C | 1.467230000  | -4.248295000 | 3.586821000  |
| C | 2.511820000  | -3.987589000 | 4.509240000  |
| H | 0.083294000  | -5.648249000 | 1.477736000  |
| H | 0.935196000  | -7.729701000 | 0.317339000  |
| C | 0.925738000  | -5.022536000 | 1.161265000  |
| C | 1.844665000  | -4.645590000 | 2.303545000  |
| H | 0.992845000  | -1.840527000 | 5.189454000  |
| H | 2.149663000  | -7.423467000 | 1.568872000  |
| C | 1.910156000  | -7.267830000 | 0.511227000  |
| C | 3.844048000  | -4.230064000 | 4.137178000  |
| H | 0.499924000  | -4.123708000 | 0.690102000  |
| H | 4.626935000  | -4.089999000 | 4.879397000  |
| C | 1.869261000  | -5.764069000 | 0.173792000  |
| C | 3.193829000  | -4.758336000 | 1.896072000  |
| H | 2.659185000  | -7.801738000 | -0.078018000 |
| C | 4.222146000  | -4.633759000 | 2.849120000  |
| H | 1.540222000  | -5.623516000 | -0.858630000 |
| C | 3.196656000  | -5.050940000 | 0.432424000  |
| H | 6.110246000  | -5.464024000 | 3.460696000  |
| C | 5.666720000  | -4.985257000 | 2.581734000  |
| H | 2.198711000  | -7.142541000 | -2.447611000 |
| H | 3.860968000  | -7.075359000 | -1.852031000 |
| C | 3.971540000  | -4.458816000 | -0.513958000 |
| C | 3.210286000  | -6.791686000 | -2.682653000 |
| H | 5.753329000  | -5.679858000 | 1.742793000  |
| H | 6.280687000  | -4.106914000 | 2.351120000  |
| H | 4.988904000  | -3.038314000 | 0.784337000  |
| C | 3.678997000  | -4.359553000 | -1.974249000 |
| C | 3.268120000  | -5.303343000 | -2.934296000 |
| H | 3.821013000  | -1.608358000 | -0.739305000 |
| C | 5.024859000  | -3.382046000 | -0.252230000 |
| H | 3.541191000  | -7.340279000 | -3.570379000 |

|   |              |              |              |
|---|--------------|--------------|--------------|
| C | 4.563831000  | -2.260077000 | -1.223753000 |
| C | 2.973572000  | -4.814660000 | -4.214707000 |
| C | 3.938909000  | -3.027139000 | -2.369356000 |
| H | 2.617153000  | -5.520557000 | -4.961764000 |
| C | 6.456326000  | -3.831812000 | -0.606404000 |
| H | 6.768054000  | -4.705298000 | -0.029203000 |
| C | 3.104371000  | -3.463183000 | -4.573118000 |
| C | 3.650345000  | -2.540902000 | -3.645054000 |
| H | 5.394786000  | -1.619130000 | -1.540116000 |
| H | 3.284422000  | -0.390958000 | -3.537961000 |
| H | 1.453125000  | -1.404462000 | -5.217202000 |
| C | 2.652009000  | -3.053826000 | -5.927976000 |
| C | 1.782533000  | -1.965994000 | -6.083602000 |
| H | 6.531230000  | -4.093366000 | -1.667619000 |
| C | 3.986584000  | -1.105379000 | -3.990585000 |
| H | 7.170504000  | -3.023931000 | -0.409571000 |
| C | 3.007892000  | -3.743400000 | -7.100208000 |
| N | 1.300703000  | -1.565418000 | -7.275450000 |
| H | 3.687109000  | -4.588546000 | -7.043126000 |
| C | 1.653440000  | -2.233557000 | -8.392784000 |
| C | 2.505687000  | -3.331463000 | -8.333550000 |
| H | 3.999399000  | -0.925799000 | -5.068415000 |
| H | 4.978956000  | -0.841506000 | -3.610551000 |
| H | 1.243451000  | -1.879003000 | -9.331719000 |
| H | 2.775733000  | -3.847593000 | -9.248819000 |
| H | 3.751062000  | 2.931185000  | 9.240527000  |
| H | -1.734763000 | -1.619303000 | 9.302027000  |
| H | 1.736116000  | 1.460657000  | 9.328001000  |
| H | -3.749723000 | -3.088132000 | 9.189817000  |
| C | 3.347021000  | 2.509687000  | 8.326131000  |
| C | -2.224314000 | -1.831517000 | 8.358256000  |
| C | 2.225529000  | 1.688914000  | 8.387910000  |
| C | -3.345815000 | -2.651123000 | 8.282671000  |
| C | 3.940146000  | 2.767809000  | 7.091381000  |
| N | -1.698570000 | -1.267802000 | 7.251418000  |
| H | 4.825697000  | 3.393248000  | 7.032285000  |
| N | 1.699624000  | 1.144128000  | 7.271709000  |
| C | -3.939120000 | -2.888181000 | 7.043791000  |
| H | -4.824679000 | -3.512526000 | 6.974181000  |
| C | 3.405181000  | 2.203300000  | 5.920298000  |
| C | -2.269262000 | -1.500242000 | 6.054170000  |
| H | 4.048661000  | 4.584566000  | 4.953317000  |
| C | 2.270142000  | 1.396923000  | 6.078510000  |
| C | -3.404324000 | -2.303811000 | 5.882414000  |
| C | 4.194989000  | 3.808072000  | 4.205612000  |
| H | 5.434613000  | 6.079906000  | 3.559055000  |
| H | -1.795896000 | -1.036758000 | 5.196508000  |
| H | 4.086919000  | 6.259964000  | 2.439563000  |

|   |              |              |              |
|---|--------------|--------------|--------------|
| C | 3.949380000  | 2.472716000  | 4.564161000  |
| H | -4.111398000 | 0.127052000  | 5.061553000  |
| H | 1.796651000  | 0.948110000  | 5.213149000  |
| C | 4.963285000  | 5.643976000  | 2.672305000  |
| H | -3.273188000 | 0.469706000  | 3.538550000  |
| C | -4.146016000 | -0.031132000 | 3.980855000  |
| C | -3.948720000 | -2.550095000 | 4.521964000  |
| C | 4.609544000  | 4.197185000  | 2.924302000  |
| C | -4.217346000 | -1.497776000 | 3.610670000  |
| H | -4.047931000 | -4.668268000 | 4.875114000  |
| H | 4.112115000  | -0.213232000 | 5.058058000  |
| C | 4.217862000  | 1.436066000  | 3.635040000  |
| H | 5.664946000  | 5.737736000  | 1.840034000  |
| C | -4.194373000 | -3.879155000 | 4.140762000  |
| H | -5.026438000 | 0.502151000  | 3.607595000  |
| C | 4.146566000  | -0.036669000 | 3.980205000  |
| H | 3.031586000  | 4.981759000  | 0.852788000  |
| C | 4.742160000  | 3.177080000  | 1.963544000  |
| H | 3.027290000  | 7.173537000  | -0.322408000 |
| H | 4.705384000  | 6.767708000  | 0.068672000  |
| C | 4.625977000  | 1.824477000  | 2.358451000  |
| C | 3.836802000  | 6.461017000  | -0.518542000 |
| C | -4.625644000 | -1.864395000 | 2.327711000  |
| C | 3.384058000  | 5.026593000  | -0.180492000 |
| H | 5.026918000  | -0.563531000 | 3.597778000  |
| H | 3.273658000  | -0.529889000 | 3.529575000  |
| C | -4.609111000 | -4.246395000 | 2.853072000  |
| H | -5.434086000 | -6.139657000 | 3.455788000  |
| H | -5.635373000 | -0.096195000 | 1.525446000  |
| C | 5.047109000  | 3.192455000  | 0.502497000  |
| C | -4.741875000 | -3.210079000 | 1.909845000  |
| H | 7.409962000  | 2.135565000  | 1.649889000  |
| C | -5.012393000 | -0.935886000 | 1.196511000  |
| H | -7.409726000 | -2.163402000 | 1.614366000  |
| C | -4.962880000 | -5.688688000 | 2.576525000  |
| H | 1.632080000  | 5.407705000  | -1.479994000 |
| C | 2.270329000  | 4.574014000  | -1.165378000 |
| H | 4.107309000  | 6.545018000  | -1.576828000 |
| C | 4.462996000  | 3.975482000  | -0.442160000 |
| C | 5.012551000  | 0.915364000  | 1.211545000  |
| H | 1.614541000  | 3.827112000  | -0.692850000 |
| H | -4.086544000 | -6.300618000 | 2.333210000  |
| H | -4.117648000 | -0.506035000 | 0.721261000  |
| C | -7.263177000 | -1.914961000 | 0.557485000  |
| C | 7.263251000  | 1.905160000  | 0.588951000  |
| H | -7.726704000 | -0.938436000 | 0.375808000  |
| C | 5.762393000  | 1.867276000  | 0.238502000  |
| H | 4.117731000  | 0.493677000  | 0.729174000  |

|   |              |              |              |
|---|--------------|--------------|--------------|
| H | 5.635570000  | 0.070187000  | 1.526039000  |
| C | -5.762370000 | -1.871097000 | 0.207509000  |
| H | 7.802114000  | 2.659180000  | 0.010685000  |
| H | -5.664655000 | -5.768268000 | 1.742874000  |
| C | -5.047036000 | -3.200572000 | 0.448791000  |
| C | 4.376065000  | 3.695500000  | -1.905697000 |
| C | 3.047035000  | 3.958895000  | -2.309791000 |
| H | 7.726740000  | 0.931865000  | 0.390602000  |
| H | -7.802118000 | -2.659032000 | -0.033459000 |
| H | -3.031444000 | -4.995558000 | 0.768265000  |
| H | 0.871960000  | 5.009727000  | -3.560404000 |
| H | 7.090741000  | 3.876208000  | -1.758991000 |
| H | 5.630554000  | 1.547124000  | -0.797857000 |
| H | -5.630688000 | -1.533340000 | -0.823267000 |
| C | -4.463054000 | -3.967389000 | -0.509149000 |
| C | -3.384067000 | -5.022792000 | -0.265578000 |
| C | 1.139032000  | 4.020642000  | -3.946716000 |
| C | 2.571585000  | 3.681336000  | -3.591980000 |
| C | 5.327925000  | 3.292815000  | -2.861236000 |
| C | 6.814092000  | 3.232713000  | -2.597544000 |
| H | 0.968561000  | 4.042738000  | -5.025874000 |
| H | -1.614636000 | -3.814736000 | -0.757690000 |
| H | -4.705339000 | -6.767915000 | -0.045911000 |
| H | 7.370159000  | 3.571203000  | -3.477728000 |
| C | -2.270486000 | -4.553491000 | -1.242775000 |
| C | -3.836845000 | -6.451256000 | -0.627943000 |
| H | -7.090995000 | -3.845745000 | -1.823727000 |
| H | 0.420811000  | 3.314666000  | -3.506195000 |
| H | 7.162952000  | 2.219130000  | -2.368258000 |
| H | -3.027297000 | -7.167003000 | -0.444091000 |
| C | -4.376337000 | -3.662521000 | -1.967718000 |
| C | 4.850070000  | 3.009311000  | -4.148209000 |
| C | 3.501668000  | 3.143283000  | -4.516878000 |
| H | -1.632274000 | -5.381695000 | -1.571636000 |
| C | -6.814471000 | -3.188046000 | -2.651228000 |
| H | -7.163302000 | -2.178522000 | -2.404645000 |
| C | -3.047365000 | -3.918982000 | -2.376432000 |
| C | -5.328341000 | -3.243633000 | -2.916121000 |
| H | -4.107506000 | -6.517224000 | -1.687466000 |
| H | 4.647845000  | 3.747133000  | -6.972200000 |
| H | 5.562247000  | 2.659269000  | -4.892313000 |
| C | 3.103763000  | 2.702604000  | -5.878981000 |
| H | -7.370663000 | -3.511485000 | -3.536974000 |
| C | 3.803210000  | 3.068492000  | -7.042249000 |
| H | -0.421322000 | -3.254438000 | -3.562071000 |
| C | -2.572104000 | -3.619621000 | -3.653778000 |
| C | -4.850676000 | -2.938247000 | -4.198150000 |
| C | -1.139600000 | -3.952815000 | -4.014451000 |

|    |              |              |              |
|----|--------------|--------------|--------------|
| C  | -3.502327000 | -3.065907000 | -4.569244000 |
| H  | -0.872461000 | -4.948336000 | -3.645085000 |
| C  | 2.017285000  | 1.834575000  | -6.051249000 |
| H  | -5.562966000 | -2.575592000 | -4.936081000 |
| C  | 3.401703000  | 2.576929000  | -8.283293000 |
| H  | 1.448458000  | 1.497777000  | -5.192482000 |
| H  | 3.925543000  | 2.854790000  | -9.191817000 |
| H  | -1.449218000 | -1.409127000 | -5.217026000 |
| H  | -0.969284000 | -3.956520000 | -5.093853000 |
| C  | -3.104623000 | -2.602091000 | -5.923702000 |
| C  | -2.018171000 | -1.731251000 | -6.081321000 |
| N  | 1.626787000  | 1.363028000  | -7.250531000 |
| C  | 2.304336000  | 1.725301000  | -8.359113000 |
| C  | -3.804240000 | -2.948118000 | -7.092931000 |
| H  | -4.648864000 | -3.627856000 | -7.034327000 |
| N  | -1.627848000 | -1.239346000 | -7.272455000 |
| H  | 1.957723000  | 1.323418000  | -9.304495000 |
| C  | -3.402916000 | -2.435488000 | -8.325481000 |
| C  | -2.305561000 | -1.582690000 | -8.386947000 |
| H  | -3.926888000 | -2.697838000 | -9.238529000 |
| H  | -1.959086000 | -1.164763000 | -9.325398000 |
| Pd | -0.000535000 | 0.062302000  | -7.315727000 |
| Pd | 0.000531000  | -0.062300000 | 7.315811000  |

$(S,S)_3(R,R)$

Sum of electronic and thermal free energies: -5952.736258

|   |             |              |              |
|---|-------------|--------------|--------------|
| C | 4.139081000 | -4.757915000 | -0.953241000 |
| C | 2.902383000 | -5.147512000 | -1.471078000 |
| C | 2.564153000 | -5.030221000 | -2.838088000 |
| C | 3.567078000 | -4.691583000 | -3.768603000 |
| C | 4.797464000 | -4.265761000 | -3.246452000 |
| C | 5.077532000 | -4.229304000 | -1.871189000 |
| H | 5.567922000 | -3.943992000 | -3.944287000 |
| C | 4.450299000 | -5.011344000 | 0.506121000  |
| H | 3.655685000 | -4.649008000 | 1.167339000  |
| H | 5.391527000 | -4.556589000 | 0.824696000  |
| H | 4.541582000 | -6.089928000 | 0.689108000  |
| C | 3.420946000 | -4.845121000 | -5.265124000 |
| H | 4.348889000 | -5.236480000 | -5.694848000 |
| H | 3.205840000 | -3.898933000 | -5.775195000 |
| H | 2.619757000 | -5.545372000 | -5.511466000 |
| C | 1.747304000 | -5.732457000 | -0.690759000 |
| C | 1.106136000 | -5.340766000 | -2.964666000 |
| C | 6.352112000 | -3.595697000 | -1.430413000 |
| C | 7.620980000 | -4.016505000 | -1.858258000 |
| C | 8.759734000 | -3.326587000 | -1.441069000 |
| C | 8.622992000 | -2.220524000 | -0.609597000 |

|   |              |              |              |
|---|--------------|--------------|--------------|
| N | 7.408342000  | -1.798406000 | -0.197002000 |
| C | 6.310549000  | -2.468423000 | -0.597101000 |
| H | 5.357432000  | -2.084641000 | -0.253061000 |
| H | 7.712490000  | -4.884995000 | -2.503702000 |
| H | 9.750524000  | -3.640988000 | -1.751881000 |
| H | 9.483716000  | -1.656366000 | -0.268385000 |
| C | 0.191915000  | -4.641802000 | -3.690189000 |
| C | 0.520337000  | -3.455188000 | -4.596703000 |
| C | -0.478732000 | -2.384170000 | -4.091487000 |
| C | -1.668056000 | -3.206121000 | -3.645515000 |
| H | -0.725482000 | -1.651418000 | -4.867884000 |
| H | -0.054556000 | -1.824150000 | -3.244060000 |
| C | -1.287501000 | -4.560037000 | -3.479171000 |
| C | 0.263003000  | -3.749076000 | -6.088821000 |
| H | 1.550919000  | -3.123463000 | -4.455107000 |
| H | -0.793171000 | -3.983158000 | -6.262056000 |
| H | 0.850565000  | -4.595774000 | -6.450322000 |
| H | 0.516766000  | -2.875150000 | -6.700415000 |
| C | -2.282919000 | -5.524449000 | -3.224515000 |
| C | -3.583123000 | -5.052161000 | -2.993446000 |
| C | -3.944169000 | -3.695930000 | -3.057156000 |
| C | -2.967837000 | -2.740771000 | -3.443582000 |
| H | -4.349950000 | -5.785155000 | -2.753618000 |
| C | -2.051926000 | -7.016514000 | -3.281683000 |
| H | -1.199808000 | -7.256455000 | -3.921693000 |
| H | -2.931741000 | -7.520940000 | -3.693609000 |
| H | -1.862484000 | -7.457152000 | -2.296249000 |
| C | 0.799350000  | -6.274826000 | -1.794810000 |
| H | 1.246350000  | -4.953936000 | -0.097079000 |
| H | 2.059519000  | -6.514503000 | 0.010590000  |
| C | 1.138221000  | -7.747888000 | -2.101367000 |
| H | -0.244587000 | -6.190196000 | -1.484895000 |
| H | 0.907163000  | -8.379968000 | -1.236644000 |
| H | 2.204756000  | -7.862189000 | -2.324592000 |
| H | 0.579455000  | -8.130365000 | -2.958746000 |
| C | -3.280533000 | -1.284842000 | -3.716640000 |
| H | -4.340871000 | -1.117288000 | -3.920497000 |
| H | -2.727898000 | -0.926097000 | -4.589648000 |
| H | -2.989916000 | -0.630061000 | -2.882123000 |
| C | -5.352736000 | -3.324378000 | -2.758780000 |
| C | -5.662576000 | -2.199145000 | -1.979645000 |
| N | -6.923281000 | -1.810463000 | -1.698540000 |
| C | -7.960413000 | -2.546552000 | -2.145297000 |
| C | -7.750191000 | -3.696034000 | -2.900444000 |
| C | -6.449084000 | -4.078324000 | -3.218637000 |
| H | -6.279229000 | -4.950909000 | -3.841524000 |
| H | -4.871627000 | -1.586208000 | -1.565512000 |
| H | -8.957115000 | -2.202331000 | -1.893642000 |

|   |              |              |              |
|---|--------------|--------------|--------------|
| H | -8.602706000 | -4.268336000 | -3.250715000 |
| H | -9.248359000 | 4.340863000  | 1.291784000  |
| C | -8.331674000 | 3.775386000  | 1.161547000  |
| H | -9.287537000 | 2.162498000  | 0.070917000  |
| H | -7.094444000 | 5.164818000  | 2.243840000  |
| C | -8.366557000 | 2.562637000  | 0.479566000  |
| C | -7.124192000 | 4.235195000  | 1.683898000  |
| H | -5.180165000 | 1.423594000  | 3.080810000  |
| C | -4.101787000 | 1.590522000  | 3.023508000  |
| H | -3.692468000 | 0.888835000  | 2.281657000  |
| N | -7.245260000 | 1.836660000  | 0.300562000  |
| H | -3.679101000 | 1.294351000  | 3.986343000  |
| C | -5.946023000 | 3.485839000  | 1.510012000  |
| C | -6.075019000 | 2.291603000  | 0.787854000  |
| C | -3.751016000 | 3.027468000  | 2.706504000  |
| C | -4.624365000 | 3.919958000  | 2.030989000  |
| H | -1.895513000 | 2.203144000  | 4.754267000  |
| H | -1.092666000 | 3.718961000  | 6.617873000  |
| C | -1.473666000 | 2.820227000  | 3.952699000  |
| C | -2.528155000 | 3.540197000  | 3.137522000  |
| H | -5.204810000 | 1.679648000  | 0.587002000  |
| H | -2.250202000 | 4.731893000  | 5.739320000  |
| C | -1.186988000 | 4.488500000  | 5.843039000  |
| C | -4.250565000 | 5.264942000  | 1.874448000  |
| H | -0.869945000 | 2.155527000  | 3.316897000  |
| H | -4.951206000 | 5.950172000  | 1.402572000  |
| C | -0.605535000 | 3.980866000  | 4.508860000  |
| C | -2.111239000 | 4.865630000  | 2.873008000  |
| H | -0.676702000 | 5.387090000  | 6.197500000  |
| C | -3.010962000 | 5.775350000  | 2.286989000  |
| H | 0.426676000  | 3.656224000  | 4.654565000  |
| C | -0.711574000 | 4.999240000  | 3.373456000  |
| H | -3.667449000 | 7.825894000  | 2.314358000  |
| C | -2.744528000 | 7.256977000  | 2.163309000  |
| H | 1.774317000  | 4.792619000  | 6.150768000  |
| H | 1.242052000  | 6.305133000  | 5.404064000  |
| C | 0.345066000  | 5.549459000  | 2.720435000  |
| C | 2.084323000  | 5.615823000  | 5.496615000  |
| H | -2.019084000 | 7.589123000  | 2.910128000  |
| H | -2.354741000 | 7.533965000  | 1.176826000  |
| H | -0.659198000 | 6.023464000  | 0.849390000  |
| C | 1.781329000  | 5.234525000  | 2.966849000  |
| C | 2.550612000  | 5.139126000  | 4.140949000  |
| H | 1.009942000  | 4.474725000  | 0.130951000  |
| C | 0.309863000  | 6.181110000  | 1.329762000  |
| H | 2.894349000  | 6.144393000  | 6.010029000  |
| C | 1.425427000  | 5.380001000  | 0.598581000  |
| C | 3.847261000  | 4.627382000  | 4.002425000  |



|   |               |              |              |
|---|---------------|--------------|--------------|
| C | 2.387732000   | 5.016102000  | 1.709638000  |
| H | 4.440754000   | 4.488532000  | 4.903393000  |
| C | 0.650413000   | 7.684265000  | 1.338340000  |
| H | -0.052632000  | 8.260567000  | 1.944685000  |
| C | 4.401724000   | 4.260919000  | 2.765318000  |
| C | 3.683305000   | 4.517227000  | 1.570170000  |
| H | 1.897734000   | 5.964238000  | -0.199916000 |
| H | 3.840483000   | 3.464452000  | -0.337652000 |
| H | 5.097768000   | 1.974289000  | 1.471336000  |
| C | 5.721364000   | 3.580412000  | 2.775879000  |
| C | 5.905097000   | 2.385423000  | 2.066191000  |
| H | 1.653817000   | 7.854323000  | 1.743971000  |
| C | 4.267177000   | 4.331948000  | 0.185461000  |
| H | 0.627947000   | 8.087430000  | 0.319426000  |
| C | 6.814114000   | 4.032046000  | 3.536530000  |
| N | 7.052772000   | 1.682081000  | 2.086104000  |
| H | 6.734674000   | 4.959282000  | 4.095680000  |
| C | 8.092218000   | 2.124577000  | 2.823983000  |
| C | 7.999507000   | 3.299905000  | 3.561680000  |
| H | 5.353497000   | 4.213258000  | 0.202174000  |
| H | 4.049745000   | 5.204298000  | -0.440004000 |
| H | 8.994940000   | 1.524308000  | 2.816878000  |
| H | 8.853061000   | 3.634992000  | 4.141483000  |
| H | -8.388048000  | 2.181807000  | -5.186902000 |
| H | -9.703874000  | -0.655056000 | 0.860720000  |
| H | -8.766010000  | 0.890302000  | -3.085704000 |
| H | -10.298482000 | -1.647913000 | 3.064899000  |
| C | -7.561996000  | 1.994054000  | -4.509136000 |
| C | -8.937967000  | -1.041673000 | 1.524149000  |
| C | -7.784991000  | 1.275310000  | -3.339884000 |
| C | -9.258976000  | -1.594298000 | 2.758834000  |
| C | -6.283128000  | 2.474658000  | -4.782248000 |
| N | -7.659039000  | -0.960939000 | 1.098753000  |
| H | -6.101567000  | 3.056808000  | -5.680389000 |
| N | -6.782770000  | 1.029161000  | -2.470438000 |
| C | -8.237849000  | -2.069356000 | 3.584632000  |
| H | -8.472025000  | -2.501259000 | 4.553052000  |
| C | -5.226979000  | 2.224960000  | -3.887951000 |
| C | -6.676859000  | -1.435063000 | 1.889618000  |
| H | -3.956801000  | 2.019401000  | -6.201329000 |
| C | -5.544609000  | 1.484376000  | -2.739491000 |
| C | -6.906761000  | -1.997057000 | 3.152508000  |
| C | -3.307936000  | 2.443670000  | -5.438349000 |
| H | -2.384633000  | 2.862421000  | -7.902950000 |
| H | -5.665134000  | -1.361371000 | 1.506878000  |
| H | -1.267764000  | 1.564849000  | -7.490757000 |
| C | -3.831987000  | 2.662331000  | -4.153228000 |
| H | -6.208118000  | -0.734401000 | 6.449905000  |

|   |              |              |              |
|---|--------------|--------------|--------------|
| H | -4.774369000 | 1.237594000  | -2.018957000 |
| C | -1.560386000 | 2.589977000  | -7.235950000 |
| H | -4.962362000 | 0.284191000  | 5.742783000  |
| C | -5.705692000 | -0.482553000 | 5.506492000  |
| C | -5.717433000 | -2.495122000 | 3.910431000  |
| C | -1.984021000 | 2.737020000  | -5.793201000 |
| C | -5.073520000 | -1.713677000 | 4.898048000  |
| H | -5.763856000 | -4.372715000 | 2.868117000  |
| H | -4.639942000 | 3.763408000  | -1.779077000 |
| C | -3.028462000 | 3.294064000  | -3.170269000 |
| H | -0.715119000 | 3.243078000  | -7.465222000 |
| C | -5.189706000 | -3.739425000 | 3.541523000  |
| H | -6.458447000 | -0.030948000 | 4.853703000  |
| C | -3.548361000 | 3.729060000  | -1.816667000 |
| H | 0.154760000  | 1.064710000  | -5.794608000 |
| C | -1.149392000 | 3.235310000  | -4.774714000 |
| H | 1.588828000  | 0.396622000  | -7.713017000 |
| H | 1.172367000  | 2.105437000  | -7.913221000 |
| C | -1.706836000 | 3.574100000  | -3.519786000 |
| C | 1.706534000  | 1.395577000  | -7.277473000 |
| C | -3.812455000 | -2.150494000 | 5.316328000  |
| C | 1.189943000  | 1.412736000  | -5.824951000 |
| H | -3.188797000 | 4.732953000  | -1.569938000 |
| H | -3.202979000 | 3.073413000  | -1.004663000 |
| C | -3.962671000 | -4.213761000 | 4.023051000  |
| H | -4.409146000 | -6.310336000 | 3.945888000  |
| H | -2.453170000 | -0.544672000 | 5.828312000  |
| C | 0.307311000  | 3.557911000  | -4.720869000 |
| C | -3.210140000 | -3.322341000 | 4.810617000  |
| H | -0.917582000 | 6.108521000  | -4.663219000 |
| C | -2.872217000 | -1.455979000 | 6.281479000  |
| C | -3.562747000 | -5.644309000 | 3.745313000  |
| H | 2.512085000  | -0.327578000 | -5.473246000 |
| C | 2.096768000  | 0.527088000  | -4.926681000 |
| H | 2.770505000  | 1.654028000  | -7.315274000 |
| C | 1.333464000  | 2.777685000  | -5.151954000 |
| C | -0.671465000 | 4.272768000  | -2.665001000 |
| H | 1.525611000  | 0.119710000  | -4.079021000 |
| H | -3.263440000 | -5.811511000 | 2.704037000  |
| H | -3.364798000 | -1.152726000 | 7.211894000  |
| C | 0.105426000  | 6.072913000  | -4.272746000 |
| C | 0.421588000  | 4.680925000  | -3.689972000 |
| H | -0.259984000 | 3.584001000  | -1.911586000 |
| H | -1.073732000 | 5.136496000  | -2.123376000 |
| C | -1.749213000 | -2.508246000 | 6.530310000  |
| H | 0.779225000  | 6.339733000  | -5.090113000 |
| H | -2.738050000 | -5.956120000 | 4.389205000  |
| C | -1.779742000 | -3.311788000 | 5.232208000  |

|   |              |              |              |
|---|--------------|--------------|--------------|
| C | 2.747890000  | 2.823529000  | -4.675748000 |
| C | 3.158544000  | 1.490898000  | -4.443591000 |
| H | 0.194417000  | 6.841606000  | -3.496376000 |
| H | 4.528152000  | -0.858636000 | -4.582531000 |
| H | 2.686645000  | 5.328814000  | -5.740066000 |
| H | 1.409056000  | 4.689310000  | -3.222798000 |
| C | -0.733428000 | -3.579970000 | 4.405539000  |
| C | -0.891006000 | -3.981812000 | 2.937538000  |
| C | 4.748018000  | -0.294810000 | -3.669783000 |
| C | 4.376331000  | 1.162240000  | -3.847910000 |
| C | 3.659324000  | 3.876973000  | -4.471296000 |
| C | 3.428258000  | 5.295017000  | -4.938579000 |
| H | 5.810786000  | -0.433393000 | -3.457085000 |
| H | 0.338270000  | -3.261250000 | 1.254595000  |
| H | 4.358848000  | 5.722769000  | -5.325460000 |
| C | 0.008559000  | -2.929826000 | 2.244839000  |
| H | 0.553522000  | -4.596176000 | 6.877029000  |
| H | 4.176537000  | -0.778622000 | -2.865306000 |
| H | 3.081417000  | 5.955652000  | -4.135500000 |
| C | 0.703610000  | -3.185258000 | 4.522298000  |
| C | 4.877901000  | 3.548877000  | -3.860241000 |
| C | 5.228922000  | 2.238838000  | -3.496052000 |
| H | -0.538968000 | -1.985332000 | 2.108102000  |
| C | 1.318509000  | -3.817607000 | 6.940234000  |
| H | 0.949641000  | -3.048855000 | 7.628631000  |
| C | 1.139261000  | -2.765942000 | 3.240337000  |
| C | 1.636487000  | -3.261279000 | 5.573854000  |
| H | 7.803176000  | 3.207587000  | -3.962354000 |
| H | 5.576885000  | 4.355061000  | -3.648050000 |
| C | 6.478534000  | 2.036000000  | -2.718662000 |
| H | 2.210505000  | -4.256357000 | 7.397521000  |
| C | 7.713457000  | 2.616901000  | -3.055686000 |
| H | 2.057351000  | -2.257228000 | 0.837137000  |
| C | 2.442525000  | -2.352634000 | 2.963911000  |
| C | 2.956552000  | -2.888515000 | 5.282566000  |
| C | 2.778665000  | -1.881706000 | 1.564990000  |
| C | 3.392552000  | -2.447025000 | 4.020973000  |
| H | 2.757401000  | -0.784829000 | 1.488221000  |
| C | 6.447869000  | 1.277528000  | -1.541054000 |
| H | 3.683787000  | -2.962772000 | 6.086837000  |
| C | 8.824485000  | 2.419656000  | -2.236510000 |
| H | 5.521844000  | 0.818777000  | -1.215025000 |
| H | 9.786589000  | 2.855304000  | -2.484817000 |
| H | 4.756271000  | -0.552750000 | 2.477295000  |
| H | 3.766088000  | -2.218931000 | 1.240471000  |
| C | 4.853920000  | -2.261602000 | 3.807166000  |
| C | 5.389997000  | -1.295919000 | 2.940213000  |
| N | 7.521665000  | 1.083086000  | -0.752165000 |

|    |              |              |              |
|----|--------------|--------------|--------------|
| C  | 8.701239000  | 1.644016000  | -1.087610000 |
| C  | 5.794935000  | -3.110388000 | 4.427438000  |
| H  | 5.453944000  | -3.890141000 | 5.100195000  |
| N  | 6.700001000  | -1.226816000 | 2.620111000  |
| H  | 9.540582000  | 1.466727000  | -0.424657000 |
| C  | 7.154310000  | -2.985714000 | 4.157960000  |
| C  | 7.579711000  | -2.052154000 | 3.218308000  |
| H  | 7.880731000  | -3.634152000 | 4.636212000  |
| H  | 8.620065000  | -1.964718000 | 2.926854000  |
| Pd | 7.218382000  | -0.061628000 | 0.964589000  |
| Pd | -7.187487000 | 0.004503000  | -0.696244000 |
| C  | -0.376346000 | -5.402648000 | 2.630635000  |
| H  | 0.699284000  | -5.478756000 | 2.824685000  |
| H  | -0.872594000 | -6.160966000 | 3.239399000  |
| H  | -0.546700000 | -5.651849000 | 1.576571000  |
| H  | -1.926502000 | -3.884704000 | 2.608130000  |
| C  | -2.087625000 | -3.357676000 | 7.771677000  |
| H  | -3.087733000 | -3.795999000 | 7.682081000  |
| H  | -1.378954000 | -4.177009000 | 7.915802000  |
| H  | -2.073460000 | -2.735336000 | 8.673105000  |
| H  | -0.783250000 | -2.016087000 | 6.668857000  |

$(S,S)_2(R,R)_2$

Sum of electronic and thermal free energies: -5952.730598

|   |             |             |              |
|---|-------------|-------------|--------------|
| C | 4.997119000 | 2.032553000 | -4.182062000 |
| C | 3.816062000 | 2.706126000 | -4.504501000 |
| C | 3.468394000 | 3.956658000 | -3.942709000 |
| C | 4.427786000 | 4.666489000 | -3.193570000 |
| C | 5.580391000 | 3.962074000 | -2.814257000 |
| C | 5.841977000 | 2.648541000 | -3.228407000 |
| H | 6.301145000 | 4.460623000 | -2.169034000 |
| C | 5.391592000 | 0.770503000 | -4.917674000 |
| H | 4.527005000 | 0.154240000 | -5.176325000 |
| H | 6.093397000 | 0.151600000 | -4.350820000 |
| H | 5.891036000 | 1.027998000 | -5.861330000 |
| C | 4.327962000 | 6.137867000 | -2.861387000 |
| H | 5.294251000 | 6.623789000 | -3.033633000 |
| H | 4.055746000 | 6.327641000 | -1.816620000 |
| H | 3.590714000 | 6.634762000 | -3.495068000 |
| C | 2.729368000 | 2.234453000 | -5.448091000 |
| C | 2.047279000 | 4.237678000 | -4.313850000 |
| C | 6.979351000 | 1.925662000 | -2.584389000 |
| C | 8.328509000 | 2.278558000 | -2.734223000 |
| C | 9.309830000 | 1.586711000 | -2.022083000 |
| C | 8.935280000 | 0.563548000 | -1.158341000 |

|   |              |             |              |
|---|--------------|-------------|--------------|
| N | 7.639838000  | 0.218687000 | -0.997163000 |
| C | 6.694893000  | 0.877626000 | -1.696835000 |
| H | 5.667506000  | 0.571985000 | -1.533098000 |
| H | 8.605124000  | 3.084524000 | -3.407433000 |
| H | 10.360369000 | 1.835576000 | -2.129659000 |
| H | 9.668260000  | 0.012347000 | -0.580133000 |
| C | 1.085246000  | 4.713106000 | -3.476630000 |
| C | 1.339072000  | 5.155447000 | -2.034592000 |
| C | 0.257649000  | 4.361828000 | -1.264234000 |
| C | -0.881457000 | 4.294696000 | -2.257000000 |
| H | -0.015497000 | 4.846228000 | -0.320453000 |
| H | 0.617143000  | 3.351310000 | -1.016597000 |
| C | -0.402447000 | 4.558316000 | -3.564519000 |
| C | 1.123681000  | 6.668513000 | -1.823422000 |
| H | 2.339618000  | 4.872035000 | -1.703887000 |
| H | 0.086951000  | 6.947099000 | -2.042093000 |
| H | 1.767760000  | 7.272302000 | -2.466092000 |
| H | 1.331254000  | 6.942797000 | -0.782237000 |
| C | -1.331835000 | 4.694944000 | -4.615646000 |
| C | -2.677737000 | 4.432978000 | -4.317901000 |
| C | -3.145017000 | 4.096602000 | -3.036433000 |
| C | -2.223530000 | 4.060741000 | -1.957788000 |
| H | -3.396055000 | 4.507950000 | -5.130977000 |
| C | -0.982989000 | 5.200883000 | -5.995726000 |
| H | -0.107446000 | 5.853453000 | -5.963119000 |
| H | -1.814865000 | 5.778112000 | -6.411240000 |
| H | -0.768779000 | 4.392867000 | -6.704377000 |
| C | 1.822962000  | 3.484703000 | -5.623654000 |
| H | 2.159216000  | 1.405073000 | -5.002570000 |
| H | 3.123652000  | 1.873562000 | -6.404424000 |
| C | 2.278048000  | 4.292927000 | -6.856166000 |
| H | 0.777474000  | 3.190154000 | -5.737097000 |
| H | 2.104912000  | 3.718975000 | -7.773265000 |
| H | 3.348873000  | 4.517539000 | -6.798253000 |
| H | 1.746383000  | 5.243174000 | -6.946314000 |
| C | -2.635577000 | 3.872344000 | -0.514543000 |
| H | -3.677284000 | 4.152754000 | -0.342303000 |
| H | -2.027966000 | 4.490192000 | 0.151477000  |
| H | -2.503123000 | 2.834603000 | -0.174150000 |
| C | -4.604564000 | 3.880797000 | -2.844138000 |
| C | -5.106081000 | 2.843958000 | -2.039590000 |
| N | -6.420259000 | 2.661009000 | -1.795859000 |
| C | -7.322957000 | 3.474012000 | -2.381095000 |
| C | -6.922978000 | 4.499694000 | -3.230593000 |
| C | -5.564620000 | 4.712587000 | -3.450689000 |
| H | -5.241325000 | 5.540848000 | -4.073177000 |
| H | -4.431669000 | 2.135560000 | -1.574396000 |
| H | -8.368357000 | 3.297884000 | -2.154244000 |

|   |               |              |              |
|---|---------------|--------------|--------------|
| H | -7.671365000  | 5.138576000  | -3.687423000 |
| H | -10.360368000 | -1.835575000 | 2.129660000  |
| C | -9.309830000  | -1.586710000 | 2.022083000  |
| H | -9.668260000  | -0.012345000 | 0.580133000  |
| H | -8.605123000  | -3.084524000 | 3.407431000  |
| C | -8.935279000  | -0.563546000 | 1.158341000  |
| C | -8.328508000  | -2.278558000 | 2.734221000  |
| H | -5.891038000  | -1.028003000 | 5.861329000  |
| C | -5.391594000  | -0.770507000 | 4.917674000  |
| H | -4.527008000  | -0.154244000 | 5.176325000  |
| N | -7.639837000  | -0.218687000 | 0.997161000  |
| H | -6.093399000  | -0.151605000 | 4.350820000  |
| C | -6.979350000  | -1.925663000 | 2.584386000  |
| C | -6.694891000  | -0.877627000 | 1.696832000  |
| C | -4.997120000  | -2.032556000 | 4.182061000  |
| C | -5.580387000  | -3.962074000 | 2.814249000  |
| H | -2.159219000  | -1.405077000 | 5.002578000  |
| C | -2.729372000  | -2.234459000 | 5.448095000  |
| C | -3.816063000  | -2.706130000 | 4.504501000  |
| H | -5.667505000  | -0.571987000 | 1.533094000  |
| C | -5.841976000  | -2.648543000 | 3.228404000  |
| H | -3.123658000  | -1.873571000 | 6.404428000  |
| H | -6.301139000  | -4.460621000 | 2.169022000  |
| C | -1.822965000  | -3.484709000 | 5.623655000  |
| C | -3.468393000  | -3.956659000 | 3.942705000  |
| C | -4.427782000  | -4.666489000 | 3.193561000  |
| C | -2.047278000  | -4.237680000 | 4.313848000  |
| H | -4.055738000  | -6.327634000 | 1.816604000  |
| C | -4.327954000  | -6.137865000 | 2.861372000  |
| H | 0.107449000   | -5.853468000 | 5.963111000  |
| H | 0.768777000   | -4.392884000 | 6.704378000  |
| C | -1.085244000  | -4.713104000 | 3.476628000  |
| C | 0.982990000   | -5.200895000 | 5.995722000  |
| H | -0.086949000  | -6.947091000 | 2.042083000  |
| H | -5.294243000  | -6.623790000 | 3.033616000  |
| C | 0.402449000   | -4.558315000 | 3.564519000  |
| C | 1.331836000   | -4.694948000 | 4.615646000  |
| H | 0.015499000   | -4.846211000 | 0.320451000  |
| C | -1.339070000  | -5.155439000 | 2.034588000  |
| H | 1.814867000   | -5.778125000 | 6.411234000  |
| C | -0.257647000  | -4.361816000 | 1.264235000  |
| C | 2.677739000   | -4.432981000 | 4.317901000  |
| C | 0.881458000   | -4.294688000 | 2.257001000  |
| H | 3.396056000   | -4.507958000 | 5.130977000  |
| C | 3.145019000   | -4.096600000 | 3.036435000  |
| C | 2.223532000   | -4.060732000 | 1.957791000  |
| H | -0.617141000  | -3.351296000 | 1.016602000  |
| H | 2.027974000   | -4.490169000 | -0.151477000 |

|   |              |              |              |
|---|--------------|--------------|--------------|
| H | 4.431669000  | -2.135559000 | 1.574397000  |
| C | 4.604566000  | -3.880794000 | 2.844140000  |
| C | 5.106082000  | -2.843957000 | 2.039591000  |
| C | 2.635582000  | -3.872324000 | 0.514547000  |
| C | 5.564622000  | -4.712585000 | 3.450690000  |
| N | 6.420260000  | -2.661007000 | 1.795859000  |
| H | 5.241327000  | -5.540847000 | 4.073177000  |
| C | 7.322958000  | -3.474010000 | 2.381094000  |
| C | 6.922979000  | -4.499693000 | 3.230593000  |
| H | 3.677290000  | -4.152729000 | 0.342309000  |
| H | 2.503125000  | -2.834581000 | 0.174161000  |
| H | 8.368358000  | -3.297882000 | 2.154243000  |
| H | 7.671367000  | -5.138575000 | 3.687422000  |
| H | -8.204035000 | 4.650179000  | 3.282210000  |
| H | -9.298769000 | 0.556874000  | -2.375217000 |
| H | -8.668642000 | 3.093210000  | 1.384427000  |
| H | -9.657710000 | -1.063357000 | -4.237231000 |
| C | -7.389100000 | 4.114947000  | 2.806460000  |
| C | -8.536489000 | -0.165394000 | -2.645793000 |
| C | -7.660157000 | 3.253906000  | 1.747892000  |
| C | -8.723959000 | -1.070600000 | -3.684825000 |
| C | -6.078849000 | 4.253018000  | 3.258213000  |
| N | -7.390879000 | -0.148127000 | -1.932753000 |
| H | -5.865983000 | 4.890136000  | 4.110772000  |
| N | -6.668389000 | 2.577534000  | 1.134926000  |
| C | -7.709881000 | -1.975857000 | -3.996452000 |
| H | -7.844240000 | -2.691676000 | -4.801859000 |
| C | -5.031392000 | 3.547530000  | 2.635290000  |
| C | -6.414016000 | -1.024550000 | -2.230151000 |
| H | -3.799448000 | 5.775306000  | 3.391469000  |
| C | -5.397603000 | 2.734208000  | 1.552856000  |
| C | -6.514380000 | -1.970409000 | -3.259309000 |
| C | -3.140421000 | 4.915214000  | 3.483312000  |
| H | -2.309483000 | 7.065191000  | 4.811048000  |
| H | -5.508064000 | -0.958995000 | -1.638576000 |
| H | -1.034154000 | 7.121331000  | 3.597394000  |
| C | -3.623793000 | 3.651875000  | 3.101276000  |
| H | -5.249580000 | -4.922010000 | -0.982278000 |
| H | -4.646397000 | 2.195038000  | 0.992932000  |
| C | -1.444656000 | 6.521416000  | 4.418127000  |
| H | -4.648175000 | -3.370401000 | -0.417065000 |
| C | -5.246548000 | -3.848749000 | -1.204854000 |
| C | -5.342001000 | -2.827020000 | -3.573777000 |
| C | -1.844424000 | 5.135298000  | 3.972153000  |
| C | -4.682677000 | -3.601385000 | -2.587544000 |
| H | -5.406431000 | -2.252156000 | -5.645218000 |
| H | -4.277513000 | 0.943798000  | 3.002218000  |
| C | -2.786845000 | 2.513075000  | 3.252359000  |

|   |              |              |              |
|---|--------------|--------------|--------------|
| H | -0.686973000 | 6.477904000  | 5.204943000  |
| C | -4.843200000 | -2.790163000 | -4.885609000 |
| H | -6.276803000 | -3.498117000 | -1.104322000 |
| C | -3.204537000 | 1.107124000  | 2.884840000  |
| H | 0.556540000  | 5.748477000  | 2.632827000  |
| C | -1.011941000 | 4.008040000  | 4.094378000  |
| H | 2.044131000  | 7.730176000  | 2.883640000  |
| H | 1.352114000  | 7.341936000  | 4.466447000  |
| C | -1.522277000 | 2.722432000  | 3.800144000  |
| C | 2.011143000  | 6.973814000  | 3.675907000  |
| C | -3.471051000 | -4.187315000 | -2.955821000 |
| C | 1.532109000  | 5.623192000  | 3.110345000  |
| H | -2.695801000 | 0.369390000  | 3.508345000  |
| H | -2.939427000 | 0.864196000  | 1.844648000  |
| C | -3.626252000 | -3.378319000 | -5.253929000 |
| H | -4.054625000 | -3.629495000 | -7.345765000 |
| H | -2.072407000 | -4.452869000 | -1.324971000 |
| C | 0.392191000  | 3.830385000  | 4.564936000  |
| C | -2.888178000 | -3.991373000 | -4.225855000 |
| H | -1.188796000 | 2.718564000  | 6.642600000  |
| C | -2.572582000 | -5.054613000 | -2.098464000 |
| C | -3.203994000 | -3.374613000 | -6.704582000 |
| H | 3.121807000  | 5.849668000  | 1.579923000  |
| C | 2.572581000  | 5.054615000  | 2.098468000  |
| H | 3.018309000  | 6.885704000  | 4.098016000  |
| C | 1.493963000  | 4.510813000  | 4.156122000  |
| C | -0.514506000 | 1.665635000  | 4.206600000  |
| H | 2.072406000  | 4.452872000  | 1.324974000  |
| H | -2.837260000 | -2.395240000 | -7.033801000 |
| H | -3.121808000 | -5.849666000 | -1.579917000 |
| C | -0.146892000 | 2.380643000  | 6.617205000  |
| C | 0.416704000  | 2.432360000  | 5.184193000  |
| H | 0.054513000  | 1.302551000  | 3.337874000  |
| H | -0.975017000 | 0.791487000  | 4.680717000  |
| C | -1.532110000 | -5.623192000 | -3.110341000 |
| H | 0.421569000  | 3.014121000  | 7.302312000  |
| H | -2.415658000 | -4.107784000 | -6.889174000 |
| C | -1.493964000 | -4.510814000 | -4.156118000 |
| C | 2.888176000  | 3.991370000  | 4.225857000  |
| C | 3.471050000  | 4.187315000  | 2.955823000  |
| H | -0.116590000 | 1.354884000  | 7.002871000  |
| H | 5.249575000  | 4.922014000  | 0.982281000  |
| H | 2.415654000  | 4.107774000  | 6.889176000  |
| H | 1.423441000  | 2.010320000  | 5.169472000  |
| C | -0.392192000 | -3.830387000 | -4.564933000 |
| C | -0.416705000 | -2.432362000 | -5.184191000 |
| C | 5.246547000  | 3.848753000  | 1.204856000  |
| C | 4.682676000  | 3.601386000  | 2.587546000  |



|    |              |              |              |
|----|--------------|--------------|--------------|
| C  | 3.626250000  | 3.378314000  | 5.253930000  |
| C  | 3.203990000  | 3.374604000  | 6.704582000  |
| H  | 6.276805000  | 3.498126000  | 1.104326000  |
| H  | 0.975016000  | -0.791489000 | -4.680715000 |
| H  | 4.054621000  | 3.629486000  | 7.345767000  |
| C  | 0.514505000  | -1.665637000 | -4.206598000 |
| H  | 0.686971000  | -6.477906000 | -5.204939000 |
| H  | 4.648178000  | 3.370403000  | 0.417067000  |
| H  | 2.837258000  | 2.395230000  | 7.033799000  |
| C  | 1.011939000  | -4.008042000 | -4.094376000 |
| C  | 4.843199000  | 2.790160000  | 4.885609000  |
| C  | 5.342000000  | 2.827019000  | 3.573778000  |
| H  | -0.054514000 | -1.302553000 | -3.337872000 |
| C  | 1.444655000  | -6.521419000 | -4.418124000 |
| H  | 1.034153000  | -7.121334000 | -3.597390000 |
| C  | 1.522275000  | -2.722434000 | -3.800142000 |
| C  | 1.844422000  | -5.135301000 | -3.972149000 |
| H  | 7.844240000  | 2.691677000  | 4.801858000  |
| H  | 5.406430000  | 2.252151000  | 5.645217000  |
| C  | 6.514379000  | 1.970409000  | 3.259309000  |
| H  | 2.309481000  | -7.065193000 | -4.811046000 |
| C  | 7.709881000  | 1.975859000  | 3.996451000  |
| H  | 2.695800000  | -0.369392000 | -3.508340000 |
| C  | 2.786844000  | -2.513078000 | -3.252356000 |
| C  | 3.140419000  | -4.915217000 | -3.483308000 |
| C  | 3.204535000  | -1.107126000 | -2.884836000 |
| C  | 3.623792000  | -3.651878000 | -3.101273000 |
| H  | 2.939425000  | -0.864199000 | -1.844644000 |
| C  | 6.414016000  | 1.024552000  | 2.230150000  |
| H  | 3.799447000  | -5.775308000 | -3.391466000 |
| C  | 8.723960000  | 1.070602000  | 3.684823000  |
| H  | 5.508063000  | 0.958996000  | 1.638576000  |
| H  | 9.657711000  | 1.063360000  | 4.237228000  |
| H  | 4.646397000  | -2.195038000 | -0.992930000 |
| H  | 4.277511000  | -0.943801000 | -3.002212000 |
| C  | 5.031390000  | -3.547532000 | -2.635286000 |
| C  | 5.397602000  | -2.734209000 | -1.552854000 |
| N  | 7.390879000  | 0.148129000  | 1.932751000  |
| C  | 8.536490000  | 0.165396000  | 2.645790000  |
| C  | 6.078847000  | -4.253020000 | -3.258210000 |
| H  | 5.865981000  | -4.890139000 | -4.110769000 |
| N  | 6.668389000  | -2.577534000 | -1.134926000 |
| H  | 9.298770000  | -0.556871000 | 2.375214000  |
| C  | 7.389098000  | -4.114948000 | -2.806458000 |
| C  | 7.660157000  | -3.253907000 | -1.747892000 |
| H  | 8.204034000  | -4.650181000 | -3.282208000 |
| H  | 8.668641000  | -3.093209000 | -1.384428000 |
| Pd | 7.055670000  | -1.227026000 | 0.405745000  |

|    |              |              |              |
|----|--------------|--------------|--------------|
| Pd | -7.055670000 | 1.227027000  | -0.405746000 |
| C  | 0.146891000  | -2.380646000 | -6.617202000 |
| H  | 1.188795000  | -2.718567000 | -6.642597000 |
| H  | -0.421570000 | -3.014124000 | -7.302309000 |
| H  | 0.116589000  | -1.354887000 | -7.002868000 |
| H  | -1.423442000 | -2.010322000 | -5.169470000 |
| C  | -2.011144000 | -6.973815000 | -3.675901000 |
| H  | -3.018311000 | -6.885705000 | -4.098010000 |
| H  | -1.352115000 | -7.341938000 | -4.466441000 |
| H  | -2.044133000 | -7.730176000 | -2.883632000 |
| H  | -0.556541000 | -5.748476000 | -2.632822000 |
| C  | -2.278052000 | -4.292937000 | 6.856164000  |
| H  | -3.348877000 | -4.517549000 | 6.798248000  |
| H  | -1.746387000 | -5.243184000 | 6.946309000  |
| H  | -2.104917000 | -3.718988000 | 7.773265000  |
| H  | -0.777477000 | -3.190159000 | 5.737101000  |
| H  | -2.339616000 | -4.872025000 | 1.703884000  |
| C  | -1.123679000 | -6.668503000 | 1.823411000  |
| H  | -3.590706000 | -6.634762000 | 3.495051000  |
| H  | -1.767759000 | -7.272296000 | 2.466077000  |
| H  | -1.331250000 | -6.942782000 | 0.782225000  |

(S,S)(R,R)(S,S)(R,R)

Sum of electronic and thermal free energies: -5952.716101

|   |             |              |              |
|---|-------------|--------------|--------------|
| C | 4.131317000 | -2.414031000 | -4.927223000 |
| C | 2.852011000 | -2.224512000 | -5.459759000 |
| C | 2.385531000 | -0.962876000 | -5.885252000 |
| C | 3.280237000 | 0.119071000  | -5.985147000 |
| C | 4.539361000 | -0.053009000 | -5.395608000 |
| C | 4.950557000 | -1.265346000 | -4.824802000 |
| H | 5.234982000 | 0.783744000  | -5.403122000 |
| C | 4.582566000 | -3.793047000 | -4.501588000 |
| H | 3.793005000 | -4.331987000 | -3.967288000 |
| H | 5.463971000 | -3.765496000 | -3.855062000 |
| H | 4.842330000 | -4.403557000 | -5.376285000 |
| C | 2.987809000 | 1.390297000  | -6.748315000 |
| H | 3.830811000 | 1.631095000  | -7.405191000 |
| H | 2.833993000 | 2.256341000  | -6.093891000 |
| H | 2.101249000 | 1.279228000  | -7.375870000 |
| C | 1.761346000 | -3.264941000 | -5.615433000 |
| C | 0.915143000 | -1.079737000 | -6.104915000 |
| C | 6.233356000 | -1.270293000 | -4.056998000 |
| C | 7.454014000 | -1.763560000 | -4.538024000 |
| C | 8.592960000 | -1.694849000 | -3.733944000 |
| C | 8.494130000 | -1.154527000 | -2.457039000 |

|   |              |              |              |
|---|--------------|--------------|--------------|
| N | 7.323036000  | -0.682050000 | -1.978677000 |
| C | 6.230193000  | -0.726980000 | -2.765034000 |
| H | 5.313502000  | -0.324055000 | -2.349803000 |
| H | 7.511754000  | -2.187868000 | -5.535927000 |
| H | 9.552669000  | -2.057126000 | -4.087196000 |
| H | 9.354905000  | -1.094849000 | -1.800270000 |
| C | -0.005456000 | -0.193189000 | -5.641453000 |
| C | 0.349311000  | 1.079476000  | -4.869666000 |
| C | -0.497574000 | 0.891908000  | -3.587370000 |
| C | -1.743158000 | 0.210100000  | -4.115308000 |
| H | -0.697277000 | 1.844196000  | -3.084578000 |
| H | 0.030439000  | 0.248210000  | -2.867988000 |
| C | -1.459445000 | -0.398805000 | -5.362249000 |
| C | -0.065218000 | 2.375355000  | -5.594606000 |
| H | 1.412968000  | 1.114845000  | -4.629769000 |
| H | -1.150869000 | 2.413513000  | -5.737311000 |
| H | 0.397578000  | 2.461969000  | -6.579908000 |
| H | 0.228071000  | 3.252946000  | -5.005963000 |
| C | -2.512207000 | -0.957533000 | -6.111467000 |
| C | -3.793868000 | -0.912101000 | -5.542621000 |
| C | -4.075665000 | -0.352065000 | -4.284817000 |
| C | -3.009398000 | 0.216718000  | -3.532178000 |
| H | -4.614129000 | -1.330073000 | -6.120941000 |
| C | -2.349491000 | -1.498760000 | -7.511114000 |
| H | -1.547310000 | -0.978600000 | -8.041415000 |
| H | -3.272369000 | -1.371842000 | -8.085264000 |
| H | -2.110474000 | -2.568383000 | -7.519691000 |
| C | 0.677822000  | -2.542712000 | -6.472179000 |
| H | 1.350533000  | -3.550650000 | -4.634960000 |
| H | 2.118200000  | -4.185516000 | -6.090759000 |
| C | 0.904417000  | -2.832226000 | -7.969229000 |
| H | -0.324431000 | -2.866059000 | -6.179662000 |
| H | 0.744192000  | -3.895357000 | -8.179557000 |
| H | 1.929882000  | -2.582649000 | -8.263344000 |
| H | 0.227989000  | -2.256243000 | -8.605782000 |
| C | -3.184348000 | 0.868603000  | -2.177754000 |
| H | -4.152449000 | 1.363918000  | -2.083559000 |
| H | -2.419277000 | 1.627230000  | -2.001407000 |
| H | -3.097930000 | 0.140454000  | -1.357478000 |
| C | -5.496258000 | -0.245626000 | -3.854916000 |
| C | -5.892776000 | -0.396652000 | -2.517852000 |
| N | -7.145744000 | -0.152657000 | -2.077499000 |
| C | -8.111725000 | 0.168255000  | -2.958585000 |
| C | -7.833176000 | 0.254206000  | -4.319800000 |
| C | -6.525591000 | 0.074896000  | -4.763512000 |
| H | -6.292045000 | 0.212938000  | -5.814299000 |
| H | -5.184442000 | -0.716363000 | -1.765766000 |
| H | -9.101145000 | 0.364512000  | -2.561553000 |

|   |              |              |              |
|---|--------------|--------------|--------------|
| H | -8.629473000 | 0.501349000  | -5.013914000 |
| H | -9.569727000 | -4.618825000 | -0.276585000 |
| C | -8.626403000 | -4.126604000 | -0.064566000 |
| H | -9.417086000 | -2.133292000 | -0.366336000 |
| H | -7.528078000 | -5.946925000 | 0.304371000  |
| C | -8.554181000 | -2.738984000 | -0.113320000 |
| C | -7.485985000 | -4.862764000 | 0.258868000  |
| H | -4.992771000 | -4.739706000 | 4.018055000  |
| C | -4.821658000 | -3.998879000 | 3.226216000  |
| H | -4.138107000 | -3.250169000 | 3.641597000  |
| N | -7.399869000 | -2.087086000 | 0.146281000  |
| H | -5.782376000 | -3.514187000 | 3.034318000  |
| C | -6.281514000 | -4.198564000 | 0.536762000  |
| C | -6.300970000 | -2.798671000 | 0.459426000  |
| C | -4.250327000 | -4.674003000 | 1.998317000  |
| C | -4.482960000 | -5.743339000 | -0.180411000 |
| H | -1.576591000 | -4.059776000 | 3.255063000  |
| C | -1.966071000 | -5.085188000 | 3.174285000  |
| C | -2.956044000 | -5.197179000 | 2.035356000  |
| H | -5.394315000 | -2.234605000 | 0.640817000  |
| C | -4.991958000 | -4.891981000 | 0.812310000  |
| H | -2.408858000 | -5.332116000 | 4.146054000  |
| H | -5.106642000 | -5.973420000 | -1.041864000 |
| C | -0.832703000 | -6.074199000 | 2.776676000  |
| C | -2.383374000 | -5.903146000 | 0.954764000  |
| C | -3.195842000 | -6.296084000 | -0.126478000 |
| C | -0.928827000 | -6.068201000 | 1.252075000  |
| H | -2.519990000 | -6.865113000 | -2.125340000 |
| C | -2.789158000 | -7.317190000 | -1.163649000 |
| H | 1.510987000  | -7.924279000 | 1.919309000  |
| H | 1.898769000  | -7.034987000 | 3.394941000  |
| C | 0.086449000  | -5.833278000 | 0.378203000  |
| C | 2.250326000  | -7.266616000 | 2.383068000  |
| H | 1.491101000  | -6.642326000 | -1.951576000 |
| H | -3.618518000 | -8.006209000 | -1.355444000 |
| C | 1.511127000  | -5.486806000 | 0.672984000  |
| C | 2.473402000  | -6.029192000 | 1.546437000  |
| H | 1.087310000  | -3.947596000 | -2.191048000 |
| C | -0.110262000 | -5.431902000 | -1.084376000 |
| H | 3.182170000  | -7.830729000 | 2.489202000  |
| C | 0.753041000  | -4.148973000 | -1.167387000 |
| C | 3.739130000  | -5.424996000 | 1.556046000  |
| C | 1.888292000  | -4.443526000 | -0.208544000 |
| H | 4.480798000  | -5.829618000 | 2.240294000  |
| C | 4.099373000  | -4.343175000 | 0.734499000  |
| C | 3.145175000  | -3.838763000 | -0.192573000 |
| H | 0.177141000  | -3.271558000 | -0.836941000 |
| H | 2.827780000  | -2.844713000 | -2.086328000 |

|   |              |              |              |
|---|--------------|--------------|--------------|
| H | 5.017098000  | -1.741702000 | 0.554884000  |
| C | 5.496378000  | -3.836623000 | 0.802485000  |
| C | 5.804920000  | -2.475575000 | 0.656511000  |
| C | 3.441656000  | -2.739776000 | -1.190104000 |
| C | 6.599501000  | -4.693934000 | 0.991639000  |
| N | 7.064130000  | -1.991380000 | 0.619837000  |
| H | 6.440554000  | -5.762497000 | 1.094214000  |
| C | 8.103986000  | -2.826134000 | 0.805154000  |
| C | 7.895811000  | -4.186158000 | 1.017450000  |
| H | 4.484960000  | -2.744578000 | -1.516096000 |
| H | 3.222101000  | -1.740411000 | -0.784581000 |
| H | 9.098598000  | -2.395700000 | 0.776085000  |
| H | 8.748270000  | -4.840046000 | 1.168342000  |
| H | -8.629478000 | -0.501346000 | 5.013909000  |
| H | -9.417083000 | 2.133295000  | 0.366335000  |
| H | -9.101147000 | -0.364507000 | 2.561547000  |
| H | -9.569723000 | 4.618829000  | 0.276587000  |
| C | -7.833180000 | -0.254204000 | 4.319796000  |
| C | -8.554178000 | 2.738987000  | 0.113319000  |
| C | -8.111727000 | -0.168251000 | 2.958581000  |
| C | -8.626400000 | 4.126607000  | 0.064567000  |
| C | -6.525595000 | -0.074898000 | 4.763510000  |
| N | -7.399867000 | 2.087090000  | -0.146284000 |
| H | -6.292051000 | -0.212941000 | 5.814297000  |
| N | -7.145744000 | 0.152660000  | 2.077496000  |
| C | -7.485982000 | 4.862767000  | -0.258868000 |
| H | -7.528075000 | 5.946929000  | -0.304370000 |
| C | -5.496261000 | 0.245624000  | 3.854916000  |
| C | -6.300968000 | 2.798674000  | -0.459430000 |
| H | -4.614134000 | 1.330066000  | 6.120944000  |
| C | -5.892776000 | 0.396652000  | 2.517852000  |
| C | -6.281511000 | 4.198567000  | -0.536764000 |
| C | -3.793873000 | 0.912093000  | 5.542624000  |
| H | -3.272376000 | 1.371829000  | 8.085269000  |
| H | -5.394313000 | 2.234609000  | -0.640824000 |
| H | -2.110478000 | 2.568369000  | 7.519700000  |
| C | -4.075668000 | 0.352060000  | 4.284819000  |
| H | -4.992752000 | 4.739703000  | -4.018068000 |
| H | -5.184440000 | 0.716362000  | 1.765767000  |
| C | -2.349498000 | 1.498746000  | 7.511120000  |
| H | -4.138117000 | 3.250156000  | -3.641589000 |
| C | -4.821658000 | 3.998882000  | -3.226219000 |
| C | -4.991955000 | 4.891985000  | -0.812314000 |
| C | -2.512213000 | 0.957522000  | 6.111472000  |
| C | -4.250326000 | 4.674008000  | -1.998322000 |
| H | -5.106638000 | 5.973424000  | 1.041861000  |
| H | -4.152453000 | -1.363921000 | 2.083560000  |
| C | -3.009402000 | -0.216722000 | 3.532180000  |

|   |              |              |              |
|---|--------------|--------------|--------------|
| H | -1.547317000 | 0.978584000  | 8.041421000  |
| C | -4.482957000 | 5.743344000  | 0.180406000  |
| H | -5.782386000 | 3.514208000  | -3.034325000 |
| C | -3.184352000 | -0.868605000 | 2.177755000  |
| H | -0.324437000 | 2.866044000  | 6.179680000  |
| C | -1.459450000 | 0.398795000  | 5.362254000  |
| H | 0.744189000  | 3.895335000  | 8.179577000  |
| H | 0.227986000  | 2.256220000  | 8.605797000  |
| C | -1.743162000 | -0.210106000 | 4.115311000  |
| C | 0.904414000  | 2.832206000  | 7.969245000  |
| C | -2.956043000 | 5.197185000  | -2.035362000 |
| C | 0.677816000  | 2.542697000  | 6.472194000  |
| H | -2.419282000 | -1.627232000 | 2.001406000  |
| H | -3.097935000 | -0.140454000 | 1.357481000  |
| C | -3.195840000 | 6.296090000  | 0.126471000  |
| H | -3.618517000 | 8.006218000  | 1.355433000  |
| H | -1.576592000 | 4.059781000  | -3.255071000 |
| C | -0.005461000 | 0.193177000  | 5.641459000  |
| C | -2.383373000 | 5.903152000  | -0.954771000 |
| H | -1.150881000 | -2.413523000 | 5.737305000  |
| C | -1.966071000 | 5.085193000  | -3.174292000 |
| C | -2.789157000 | 7.317198000  | 1.163641000  |
| H | 2.118193000  | 4.185503000  | 6.090779000  |
| C | 1.761339000  | 3.264929000  | 5.615449000  |
| H | 1.929879000  | 2.582627000  | 8.263357000  |
| C | 0.915138000  | 1.079723000  | 6.104925000  |
| C | -0.497578000 | -0.891913000 | 3.587372000  |
| H | 1.350526000  | 3.550641000  | 4.634978000  |
| H | -2.519991000 | 6.865122000  | 2.125334000  |
| H | -2.408859000 | 5.332120000  | -4.146061000 |
| C | -0.065229000 | -2.375366000 | 5.594605000  |
| C | 0.349304000  | -1.079486000 | 4.869669000  |
| H | 0.030438000  | -0.248212000 | 2.867994000  |
| H | -0.697280000 | -1.844198000 | 3.084576000  |
| C | -0.832703000 | 6.074202000  | -2.776685000 |
| H | 0.397563000  | -2.461982000 | 6.579908000  |
| H | -1.938184000 | 7.909663000  | 0.820793000  |
| C | -0.928825000 | 6.068207000  | -1.252083000 |
| C | 2.385526000  | 0.962864000  | 5.885261000  |
| C | 2.852005000  | 2.224501000  | 5.459771000  |
| H | 0.228061000  | -3.252956000 | 5.005962000  |
| H | 4.842314000  | 4.403551000  | 5.376302000  |
| H | 2.101250000  | -1.279241000 | 7.375878000  |
| H | 1.412962000  | -1.114857000 | 4.629774000  |
| C | 0.086451000  | 5.833286000  | -0.378211000 |
| C | -0.110258000 | 5.431916000  | 1.084370000  |
| C | 4.582558000  | 3.793041000  | 4.501603000  |
| C | 4.131311000  | 2.414023000  | 4.927234000  |

|    |             |              |              |
|----|-------------|--------------|--------------|
| C  | 3.280233000 | -0.119082000 | 5.985153000  |
| C  | 2.987809000 | -1.390309000 | 6.748321000  |
| H  | 5.463966000 | 3.765493000  | 3.855081000  |
| H  | 1.087316000 | 3.947614000  | 2.191046000  |
| H  | 3.830813000 | -1.631104000 | 7.405196000  |
| C  | 0.753045000 | 4.148986000  | 1.167385000  |
| H  | 1.510993000 | 7.924283000  | -1.919325000 |
| H  | 3.792996000 | 4.331978000  | 3.967298000  |
| H  | 2.833994000 | -2.256353000 | 6.093899000  |
| C  | 1.511128000 | 5.486813000  | -0.672993000 |
| C  | 4.539356000 | 0.053000000  | 5.395613000  |
| C  | 4.950551000 | 1.265338000  | 4.824809000  |
| H  | 0.177145000 | 3.271570000  | 0.836942000  |
| C  | 2.250327000 | 7.266616000  | -2.383085000 |
| H  | 1.898764000 | 7.034983000  | -3.394955000 |
| C  | 1.888295000 | 4.443536000  | 0.208539000  |
| C  | 2.473403000 | 6.029194000  | -1.546449000 |
| H  | 7.511748000 | 2.187856000  | 5.535940000  |
| H  | 5.234978000 | -0.783752000 | 5.403125000  |
| C  | 6.233351000 | 1.270288000  | 4.057005000  |
| H  | 3.182173000 | 7.830724000  | -2.489227000 |
| C  | 7.454008000 | 1.763552000  | 4.538035000  |
| H  | 2.827781000 | 2.844728000  | 2.086327000  |
| C  | 3.145177000 | 3.838772000  | 0.192569000  |
| C  | 3.739131000 | 5.424998000  | -1.556057000 |
| C  | 3.441659000 | 2.739788000  | 1.190104000  |
| C  | 4.099375000 | 4.343180000  | -0.734506000 |
| H  | 3.222104000 | 1.740423000  | 0.784584000  |
| C  | 6.230188000 | 0.726981000  | 2.765038000  |
| H  | 4.480798000 | 5.829617000  | -2.240308000 |
| C  | 8.592955000 | 1.694843000  | 3.733956000  |
| H  | 5.313498000 | 0.324059000  | 2.349805000  |
| H  | 9.552665000 | 2.057118000  | 4.087211000  |
| H  | 5.017100000 | 1.741709000  | -0.554877000 |
| H  | 4.484962000 | 2.744592000  | 1.516097000  |
| C  | 5.496380000 | 3.836628000  | -0.802492000 |
| C  | 5.804923000 | 2.475581000  | -0.656510000 |
| N  | 7.323032000 | 0.682052000  | 1.978684000  |
| C  | 8.494126000 | 1.154527000  | 2.457049000  |
| C  | 6.599504000 | 4.693938000  | -0.991654000 |
| H  | 6.440555000 | 5.762500000  | -1.094238000 |
| N  | 7.064134000 | 1.991387000  | -0.619834000 |
| H  | 9.354902000 | 1.094851000  | 1.800281000  |
| C  | 7.895813000 | 4.186162000  | -1.017464000 |
| C  | 8.103988000 | 2.826139000  | -0.805159000 |
| H  | 8.748273000 | 4.840049000  | -1.168360000 |
| H  | 9.098601000 | 2.395706000  | -0.776084000 |
| Pd | 7.237063000 | 0.000004000  | 0.000003000  |

|    |              |              |              |
|----|--------------|--------------|--------------|
| Pd | -7.336791000 | 0.000002000  | -0.000001000 |
| C  | 0.414627000  | 6.484521000  | 2.081616000  |
| H  | 1.491107000  | 6.642340000  | 1.951563000  |
| H  | -0.076110000 | 7.452025000  | 1.956064000  |
| H  | 0.245375000  | 6.151774000  | 3.112645000  |
| H  | -1.157433000 | 5.209746000  | 1.297148000  |
| C  | -1.105088000 | 7.463031000  | -3.388735000 |
| H  | -2.110781000 | 7.811365000  | -3.128747000 |
| H  | -0.394300000 | 8.214925000  | -3.037412000 |
| H  | -1.037929000 | 7.417367000  | -4.481371000 |
| H  | 0.139100000  | 5.704480000  | -3.112948000 |
| C  | -1.105091000 | -7.463028000 | 3.388725000  |
| H  | -2.110785000 | -7.811360000 | 3.128737000  |
| H  | -0.394304000 | -8.214923000 | 3.037401000  |
| H  | -1.037931000 | -7.417365000 | 4.481361000  |
| H  | 0.139100000  | -5.704479000 | 3.112940000  |
| H  | -1.157437000 | -5.209732000 | -1.297153000 |
| C  | 0.414621000  | -6.484504000 | -2.081627000 |
| H  | -1.938187000 | -7.909658000 | -0.820800000 |
| H  | -0.076117000 | -7.452008000 | -1.956079000 |
| H  | 0.245369000  | -6.151753000 | -3.112655000 |

### **Pd<sub>2</sub>(unstable Z-1)<sub>4</sub>**

(S,S)<sub>4</sub>

Sum of electronic and thermal free energies: -5952.761853

|   |              |              |             |
|---|--------------|--------------|-------------|
| H | -0.348844000 | 1.348783000  | 4.574277000 |
| C | 7.466693000  | 0.914311000  | 3.988962000 |
| H | 8.398676000  | 0.762554000  | 4.523189000 |
| C | 0.458858000  | 1.121003000  | 5.279413000 |
| C | 7.337810000  | 0.447975000  | 2.686020000 |
| H | 8.147746000  | -0.070214000 | 2.185259000 |
| H | 2.796967000  | 0.611481000  | 4.122419000 |
| C | 6.386909000  | 1.555778000  | 4.589282000 |
| C | 2.793040000  | 1.619589000  | 4.532520000 |
| N | 6.194489000  | 0.617319000  | 1.989655000 |
| H | 6.463881000  | 1.908183000  | 5.612708000 |
| H | 0.018975000  | 1.169682000  | 6.281254000 |
| C | 1.624992000  | 2.069016000  | 5.159858000 |
| C | 5.182286000  | 1.727056000  | 3.883344000 |
| C | 5.146940000  | 1.237928000  | 2.570256000 |
| H | 0.784374000  | 0.091244000  | 5.097873000 |
| C | 3.986245000  | 2.359922000  | 4.494551000 |
| H | 4.258313000  | 1.363877000  | 1.961809000 |



|   |              |              |              |
|---|--------------|--------------|--------------|
| C | 1.661455000  | 3.362132000  | 5.740749000  |
| C | 0.678702000  | 4.060358000  | 6.591899000  |
| C | 4.042901000  | 3.632201000  | 5.112431000  |
| C | 2.879177000  | 4.082388000  | 5.735098000  |
| C | 1.477569000  | 5.093319000  | 7.418338000  |
| H | 5.008818000  | 5.554798000  | 4.936020000  |
| C | 5.276726000  | 4.508984000  | 5.117344000  |
| C | 2.731834000  | 5.345832000  | 6.535132000  |
| H | 3.615856000  | 5.587859000  | 7.133398000  |
| H | 6.000595000  | 4.220094000  | 4.350768000  |
| H | 5.792951000  | 4.483162000  | 6.086270000  |
| H | 2.550873000  | 6.207843000  | 5.874653000  |
| H | -5.008474000 | 1.713954000  | 7.231107000  |
| H | -2.550493000 | 2.231723000  | 8.250824000  |
| C | -1.477668000 | 4.119419000  | 8.000354000  |
| C | -5.276576000 | 2.368998000  | 6.395992000  |
| C | -2.731733000 | 3.221666000  | 7.804498000  |
| H | -6.000312000 | 1.830548000  | 5.778442000  |
| H | -4.258305000 | 1.081068000  | 2.130634000  |
| C | -2.879151000 | 3.115541000  | 6.312832000  |
| C | -5.147045000 | 1.676302000  | 2.308319000  |
| C | -4.042869000 | 2.780300000  | 5.621456000  |
| N | -6.194664000 | 1.459073000  | 1.486790000  |
| C | -0.678757000 | 3.880786000  | 6.699209000  |
| C | -1.661498000 | 3.461833000  | 5.681131000  |
| C | -3.986336000 | 2.838986000  | 4.208285000  |
| C | -5.182441000 | 2.600561000  | 3.361497000  |
| H | -5.793021000 | 3.234400000  | 6.832269000  |
| C | -2.793201000 | 3.223263000  | 3.574217000  |
| C | -1.625113000 | 3.562835000  | 4.267130000  |
| H | 0.348548000  | 3.388114000  | 3.355172000  |
| H | -3.615804000 | 3.633727000  | 8.301101000  |
| C | -6.387207000 | 3.303035000  | 3.545553000  |
| C | -7.467075000 | 3.078306000  | 2.696336000  |
| C | -0.459000000 | 4.117155000  | 3.488810000  |
| H | -2.797216000 | 3.339766000  | 2.492139000  |
| H | -0.018895000 | 4.976250000  | 4.006313000  |
| H | -6.464216000 | 4.037061000  | 4.341032000  |
| H | -8.399172000 | 3.620399000  | 2.816138000  |
| H | -0.784584000 | 4.445268000  | 2.496007000  |
| H | -8.148103000 | -1.956878000 | -0.974568000 |
| C | -7.338092000 | -2.152320000 | -1.668082000 |
| N | -6.194638000 | -1.459175000 | -1.486858000 |
| C | -7.467026000 | -3.078420000 | -2.696415000 |
| C | -5.147013000 | -1.676392000 | -2.308381000 |
| H | -8.399116000 | -3.620524000 | -2.816221000 |
| H | -4.258280000 | -1.081150000 | -2.130690000 |
| C | -6.387151000 | -3.303137000 | -3.545626000 |

|   |              |              |              |
|---|--------------|--------------|--------------|
| C | -5.182394000 | -2.600648000 | -3.361564000 |
| H | -2.797191000 | -3.339870000 | -2.492174000 |
| H | -6.464146000 | -4.037164000 | -4.341105000 |
| N | 6.194521000  | -0.617239000 | -1.989625000 |
| C | -2.793155000 | -3.223355000 | -3.574249000 |
| C | -3.986276000 | -2.839065000 | -4.208336000 |
| H | 4.258357000  | -1.363830000 | -1.961796000 |
| C | 5.146986000  | -1.237864000 | -2.570235000 |
| H | 8.147769000  | 0.070324000  | -2.185212000 |
| H | 0.348590000  | -3.388209000 | -3.355136000 |
| C | 7.337845000  | -0.447877000 | -2.685982000 |
| H | -0.348785000 | -1.348848000 | -4.574216000 |
| H | -0.784564000 | -4.445372000 | -2.496012000 |
| H | -6.000204000 | -1.830566000 | -5.778520000 |
| C | -0.458956000 | -4.117246000 | -3.488804000 |
| H | 2.797001000  | -0.611469000 | -4.122384000 |
| C | -1.625052000 | -3.562918000 | -4.267144000 |
| C | -4.042777000 | -2.780349000 | -5.621507000 |
| C | 0.458898000  | -1.121049000 | -5.279367000 |
| C | -5.276460000 | -2.369009000 | -6.396064000 |
| H | 0.784389000  | -0.091279000 | -5.097837000 |
| C | 2.793101000  | -1.619574000 | -4.532495000 |
| C | 5.182350000  | -1.726989000 | -3.883325000 |
| C | 7.466744000  | -0.914206000 | -3.988924000 |
| H | -0.018842000 | -4.976335000 | -4.006309000 |
| C | 1.625060000  | -2.069029000 | -5.159829000 |
| H | 0.018999000  | -1.169745000 | -6.281200000 |
| H | -5.008327000 | -1.713947000 | -7.231156000 |
| C | -1.661405000 | -3.461885000 | -5.681145000 |
| H | -5.792905000 | -3.234393000 | -6.832378000 |
| C | -2.879042000 | -3.115574000 | -6.312863000 |
| C | 3.986325000  | -2.359875000 | -4.494540000 |
| C | 6.386974000  | -1.555687000 | -4.589255000 |
| H | 8.398729000  | -0.762433000 | -4.523143000 |
| C | 1.661553000  | -3.362139000 | -5.740729000 |
| C | 4.043012000  | -3.632147000 | -5.112434000 |
| C | -0.678642000 | -3.880814000 | -6.699211000 |
| C | -2.731587000 | -3.221648000 | -7.804529000 |
| H | 6.463960000  | -1.908090000 | -5.612681000 |
| C | 2.879296000  | -4.082359000 | -5.735098000 |
| C | 0.678816000  | -4.060377000 | -6.591890000 |
| H | -2.550342000 | -2.231687000 | -8.250814000 |
| H | 6.000727000  | -4.219990000 | -4.350788000 |
| H | -3.615642000 | -3.633694000 | -8.301169000 |
| C | 5.276860000  | -4.508895000 | -5.117363000 |
| C | -1.477510000 | -4.119386000 | -8.000388000 |
| H | 5.008982000  | -5.554718000 | -4.936045000 |
| C | 2.731983000  | -5.345798000 | -6.535145000 |

|   |              |              |              |
|---|--------------|--------------|--------------|
| H | 2.551048000  | -6.207818000 | -5.874671000 |
| C | 1.477703000  | -5.093316000 | -7.418340000 |
| H | 5.793078000  | -4.483051000 | -6.086293000 |
| H | 3.616005000  | -5.587799000 | -7.133419000 |
| H | 5.008928000  | -4.935978000 | 5.554769000  |
| H | 2.550994000  | -5.874650000 | 6.207838000  |
| C | 5.276824000  | -5.117301000 | 4.508952000  |
| H | 6.000678000  | -4.350713000 | 4.220049000  |
| H | 5.793063000  | -6.086220000 | 4.483124000  |
| H | 3.615997000  | -7.133375000 | 5.587852000  |
| C | 2.731962000  | -6.535128000 | 5.345828000  |
| C | 4.042989000  | -5.112407000 | 3.632184000  |
| C | 1.477712000  | -7.418359000 | 5.093325000  |
| C | 2.879280000  | -5.735094000 | 4.082381000  |
| H | 6.463962000  | -5.612646000 | 1.908172000  |
| H | 8.398740000  | -4.523101000 | 0.762538000  |
| C | 6.386972000  | -4.589225000 | 1.555759000  |
| C | 7.466747000  | -3.988890000 | 0.914291000  |
| H | -0.018830000 | -4.006369000 | 4.976313000  |
| H | -0.784512000 | -2.496063000 | 4.445322000  |
| C | 0.678821000  | -6.591937000 | 4.060366000  |
| C | 3.986311000  | -4.494529000 | 2.359906000  |
| C | 5.182338000  | -3.883304000 | 1.727033000  |
| C | 7.337844000  | -2.685951000 | 0.447951000  |
| C | -0.458912000 | -3.488861000 | 4.117209000  |
| C | 1.661554000  | -5.740771000 | 3.362134000  |
| C | -1.477543000 | -8.000415000 | 4.119389000  |
| C | -0.678638000 | -6.699260000 | 3.880790000  |
| H | 8.147774000  | -2.185178000 | -0.070237000 |
| C | 5.146972000  | -2.570217000 | 1.237904000  |
| N | 6.194512000  | -1.989602000 | 0.617293000  |
| H | 0.348656000  | -3.355211000 | 3.388194000  |
| C | -1.661379000 | -5.681185000 | 3.461831000  |
| C | -1.625005000 | -4.267183000 | 3.562849000  |
| C | 2.793102000  | -4.532521000 | 1.619581000  |
| C | 1.625069000  | -5.159883000 | 2.069018000  |
| H | 4.258337000  | -1.961783000 | 1.363856000  |
| C | -2.731593000 | -7.804555000 | 3.221617000  |
| H | -3.615667000 | -8.301171000 | 3.633654000  |
| C | -2.879020000 | -6.312889000 | 3.115511000  |
| C | -2.793094000 | -3.574275000 | 3.223267000  |
| H | 8.147738000  | 2.185288000  | 0.070291000  |
| H | -2.797121000 | -2.492199000 | 3.339791000  |
| H | 2.797013000  | -4.122424000 | 0.611472000  |
| C | 7.337805000  | 2.686048000  | -0.447905000 |
| C | 0.458928000  | -5.279468000 | 1.121016000  |
| H | 8.398669000  | 4.523221000  | -0.762468000 |
| C | 7.466688000  | 3.988992000  | -0.914235000 |

|   |              |              |              |
|---|--------------|--------------|--------------|
| H | -2.550333000 | -8.250865000 | 2.231669000  |
| C | -4.042739000 | -5.621519000 | 2.780264000  |
| N | 6.194488000  | 1.989679000  | -0.617261000 |
| C | -3.986219000 | -4.208349000 | 2.838968000  |
| H | 0.019074000  | -6.281321000 | 1.169698000  |
| H | -0.348792000 | -4.574356000 | 1.348805000  |
| H | -5.792886000 | -6.832351000 | 3.234335000  |
| C | 5.146942000  | 2.570279000  | -1.237878000 |
| C | 6.386909000  | 4.589310000  | -1.555710000 |
| H | 0.784367000  | 5.097899000  | -0.091225000 |
| C | -5.276437000 | -6.396060000 | 2.368942000  |
| H | -6.464080000 | -4.341138000 | 4.037068000  |
| C | -5.182335000 | -3.361571000 | 2.600561000  |
| H | 2.796958000  | 4.122430000  | -0.611452000 |
| H | 0.784429000  | -5.097919000 | 0.091254000  |
| C | -6.387091000 | -3.545652000 | 3.303047000  |
| C | 5.182290000  | 3.883369000  | -1.727003000 |
| H | 6.463882000  | 5.612737000  | -1.908112000 |
| H | 4.258318000  | 1.961829000  | -1.363839000 |
| C | 2.793042000  | 4.532537000  | -1.619559000 |
| C | -5.146965000 | -2.308387000 | 1.676306000  |
| C | 0.458862000  | 5.279450000  | -1.120986000 |
| H | -5.008323000 | -7.231166000 | 1.713892000  |
| H | -4.258237000 | -2.130689000 | 1.081058000  |
| C | -7.466974000 | -2.696449000 | 3.078337000  |
| C | 3.986255000  | 4.494576000  | -2.359878000 |
| H | -6.000172000 | -5.778510000 | 1.830493000  |
| H | -0.348846000 | 4.574325000  | -1.348777000 |
| C | 1.625001000  | 5.159886000  | -2.068991000 |
| H | -8.399062000 | -2.816269000 | 3.620441000  |
| H | 0.018991000  | 6.281296000  | -1.169661000 |
| N | -6.194601000 | -1.486875000 | 1.459094000  |
| C | -7.338051000 | -1.668113000 | 2.152242000  |
| C | 4.042929000  | 5.112475000  | -3.632148000 |
| H | -4.258262000 | 2.130630000  | -1.081088000 |
| C | 1.661485000  | 5.740798000  | -3.362095000 |
| H | -8.148070000 | -0.974608000 | 1.956801000  |
| H | 6.000632000  | 4.350826000  | -4.220025000 |
| N | -6.194605000 | 1.486772000  | -1.459160000 |
| C | -5.146984000 | 2.308309000  | -1.676353000 |
| C | 5.276767000  | 5.117406000  | -4.508913000 |
| C | 2.879214000  | 5.735157000  | -4.082337000 |
| H | 5.792990000  | 6.086333000  | -4.483064000 |
| H | -5.008471000 | 7.231093000  | -1.713959000 |
| H | -2.550468000 | 8.250845000  | -2.231673000 |
| H | 0.348662000  | 3.355288000  | -3.388063000 |
| C | -7.338046000 | 1.667984000  | -2.152328000 |
| C | 0.678747000  | 6.591972000  | -4.060312000 |

|    |              |               |              |
|----|--------------|---------------|--------------|
| C  | -5.182361000 | 3.361492000   | -2.600607000 |
| H  | -8.148054000 | 0.974461000   | -1.956902000 |
| C  | -3.986260000 | 4.208297000   | -2.838993000 |
| H  | -6.000279000 | 5.778410000   | -1.830583000 |
| C  | -2.793108000 | 3.574248000   | -3.223253000 |
| C  | -5.276546000 | 6.395976000   | -2.369014000 |
| C  | -4.042817000 | 5.621467000   | -2.780299000 |
| C  | -1.625027000 | 4.267183000   | -3.562808000 |
| C  | 1.477634000  | 7.418436000   | -5.093240000 |
| C  | -1.661442000 | 5.681182000   | -3.461806000 |
| C  | -2.879105000 | 6.312863000   | -3.115518000 |
| C  | 2.731889000  | 6.535219000   | -5.345766000 |
| H  | -2.797104000 | 2.492171000   | -3.339762000 |
| C  | -0.678713000 | 6.699273000   | -3.880748000 |
| C  | -0.458886000 | 3.488891000   | -4.117110000 |
| H  | 3.615918000  | 7.133479000   | -5.587779000 |
| C  | -2.731702000 | 7.804533000   | -3.221624000 |
| H  | 5.008874000  | 4.936101000   | -5.554733000 |
| C  | -7.466975000 | 2.696319000   | -3.078426000 |
| C  | -6.387107000 | 3.545545000   | -3.303116000 |
| H  | -0.018792000 | 4.006397000   | -4.976209000 |
| C  | -1.477634000 | 8.000412000   | -4.119369000 |
| H  | -5.792983000 | 6.832250000   | -3.234423000 |
| H  | -3.615774000 | 8.301135000   | -3.633679000 |
| H  | -8.399057000 | 2.816119000   | -3.620546000 |
| H  | -0.784437000 | 2.496074000   | -4.445214000 |
| H  | 2.550920000  | 5.874759000   | -6.207789000 |
| H  | -6.464100000 | 4.341031000   | -4.037136000 |
| Pd | -6.140976000 | -0.000051000  | -0.000033000 |
| Pd | 6.140877000  | 0.000038000   | 0.000015000  |
| C  | -7.338126000 | 2.152205000   | 1.668006000  |
| H  | -8.148131000 | 1.956752000   | 0.974488000  |
| C  | -0.776810000 | -9.321079000  | 3.776847000  |
| H  | 0.022928000  | -9.584839000  | 4.470591000  |
| H  | -0.352168000 | -9.284204000  | 2.766764000  |
| H  | -1.505191000 | -10.139179000 | 3.803174000  |
| H  | -1.826804000 | -8.031371000  | 5.161125000  |
| C  | 0.777014000  | -7.741846000  | 6.418812000  |
| H  | 1.505328000  | -8.152716000  | 7.126812000  |
| H  | -0.023011000 | -8.477478000  | 6.322694000  |
| H  | 0.352746000  | -6.834592000  | 6.864722000  |
| H  | 1.826690000  | -8.350669000  | 4.627302000  |
| C  | -0.776946000 | 3.776882000   | 9.321026000  |
| H  | 0.022813000  | 4.470609000   | 9.584770000  |
| H  | -0.352332000 | 2.766786000   | 9.284170000  |
| H  | -1.505326000 | 3.803247000   | 10.139125000 |
| H  | -1.826906000 | 5.161164000   | 8.031295000  |
| C  | 0.776846000  | 6.418795000   | 7.741811000  |

|   |              |              |               |
|---|--------------|--------------|---------------|
| H | 1.505136000  | 7.126800000  | 8.152715000   |
| H | -0.023207000 | 6.322659000  | 8.477413000   |
| H | 0.352605000  | 6.864708000  | 6.834547000   |
| H | 1.826529000  | 4.627297000  | 8.350658000   |
| C | -0.776917000 | 9.321084000  | -3.776820000  |
| H | 0.022849000  | 9.584832000  | -4.470539000  |
| H | -0.352312000 | 9.284224000  | -2.766721000  |
| H | -1.505298000 | 10.139182000 | -3.803188000  |
| H | -1.826869000 | 8.031359000  | -5.161113000  |
| C | 0.776938000  | 7.741966000  | -6.418717000  |
| H | 1.505249000  | 8.152876000  | -7.126697000  |
| H | -0.023099000 | 8.477583000  | -6.322572000  |
| H | 0.352685000  | 6.834724000  | -6.864665000  |
| H | 1.826604000  | 8.350734000  | -4.627183000  |
| C | -0.776735000 | -3.776771000 | -9.321012000  |
| H | 0.023052000  | -4.470466000 | -9.584755000  |
| H | -0.352143000 | -2.766668000 | -9.284088000  |
| H | -1.505078000 | -3.803109000 | -10.139146000 |
| H | -1.826734000 | -5.161133000 | -8.031390000  |
| C | 0.777026000  | -6.418820000 | -7.741802000  |
| H | 1.505343000  | -7.126799000 | -8.152705000  |
| H | -0.023032000 | -6.322721000 | -8.477401000  |
| H | 0.352808000  | -6.864745000 | -6.834533000  |
| H | 1.826638000  | -4.627279000 | -8.350661000  |
